# Supplementary material for: Single-Cell analysis Uncovers the Dynamic Process of EMT in Endometrial Cancer and the Core Roles of INHBA and POSTN in Regulating Tumor Malignant Phenotypes
Source: Research Square preprint supplement (doi:10.21203/rs.3.rs-8267986/v1), 2026-02-03
Supplement: Supplementary file 1 [file 42cbe211eb3d42df55a80db3.xlsx]

## Sheet: Sheet1
TableS7:siRNAs sequence and RT-qPCR Primers of INHBA and POSTN
siRNAs sequence
siINHBA#1	Sense	5'-GGAAGACGCUGCACUUCGATT-3'
siINHBA#1	Antisense	5'-UCGAAGUGCAGCGUCUUCCTT-3'
siINHBA#2	Sense	5'-CCAUGUCCAUGUUGUACUATT-3'
siINHBA#2	Antisense	5'-UAGUACAACAUGGACAUGGTT-3'
siINHBA#3	Sense	5'-AGUUCUUUGUCAGUUUCAATT-3'
siINHBA#3	Antisense	5'-UUGAAACUGACAAAGAACUTT-3'
siPOSTN#1	Sense	5'-GGAUCUAGAAGACGAUUAATT-3'
siPOSTN#1	Antisense	5'-UUAAUCGUCUUCUAGAUCCTT-3'
siPOSTN#2	Sense	5'-GGAAAUACUUAAUAAAUUATT-3'
siPOSTN#2	Antisense	5'-UAAUUUAUUAAGUAUUUCCTT-3'
siPOSTN#3	Sense	5'-CGAGAAGAACGAAUCAUUATT-3'
siPOSTN#3	Antisense	5'-UAAUGAUUCGUUCUUCUCGTT-3'
qRT-PCR Primers
INHBA	Forward Primer	5'-ACGGGTATGTGGAGATAGAGGA-3'
	Reverse Primer	5'-GGACTTTTAGGAAGAGCCAGACT-3'
POSTN	Forward Primer	5'-GACCGTGTGCTTACACAAATTG-3'
	Reverse Primer	5'-AAGTGACCGTCTCTTCCAAGG-3'

## Sheet: Sheet2
TableS7:Antibody names for Western blot/immunofluorescence/immunohistochemistry
Reagent name	Manufacturers	Item number
POSTN	Bioss	bsm-54036R
INHBA	ABclonal	A5232
N-cadherin	proteintech	22018-1-AP
E-cadherin	proteintech	20874-1-AP
GAPDH	selleck	F0003
