# Supplementary material for: Single-Cell analysis Uncovers the Dynamic Process of EMT in Endometrial Cancer and the Core Roles of INHBA and POSTN in Regulating Tumor Malignant Phenotypes
Source: Research Square preprint supplement (doi:10.21203/rs.3.rs-8267986/v1), 2026-02-03
Supplement: Supplementary file 1 [file 293ce8298474b371587aa844.pdf]

## Supplementary Material

### 1 Supplementary Figures

**Supplementary Fig.S1** The epithelial cells subsets highly associated with EMT

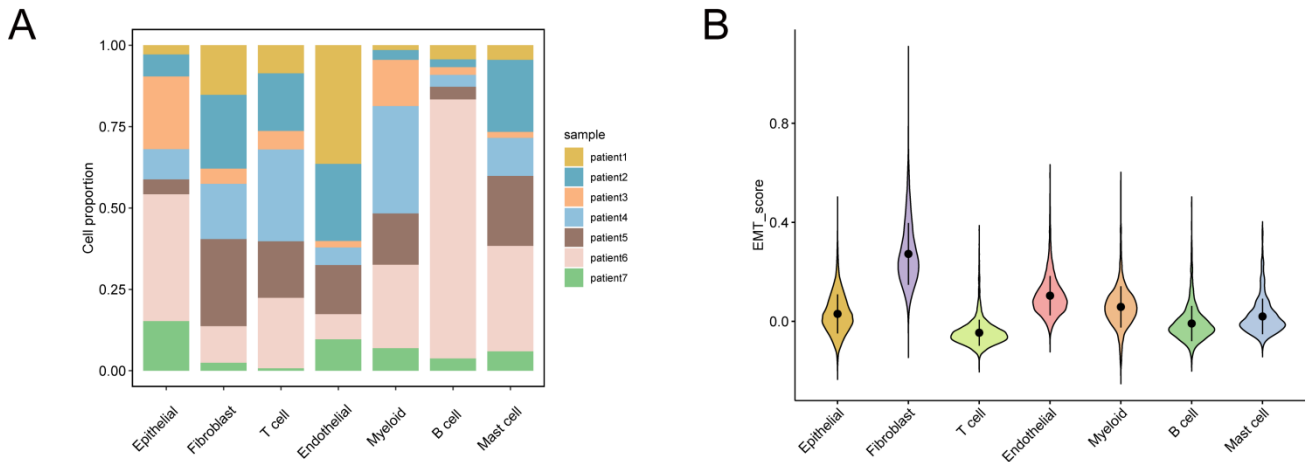

**Fig.S2** The epithelial cells subsets highly associated with EMT **A** Stacked bar plot showing the proportional distribution of 7 individual patients across 7 major cell types. **B** Violin plot showing the EMT score level of 7 major cell type.

**Supplementary Fig. S2** The GO enrichment analysis of biological processes

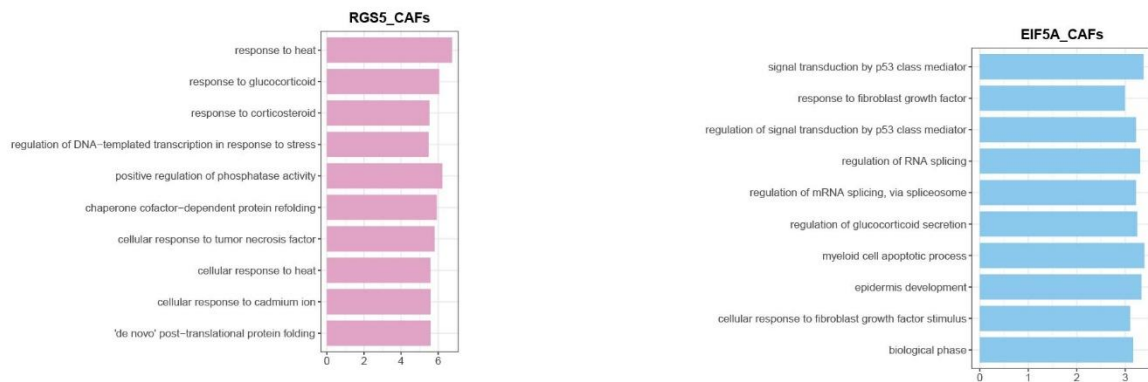

**Supplementary Fig. S3** Single-cell landscape of 11 normal endometrial samples

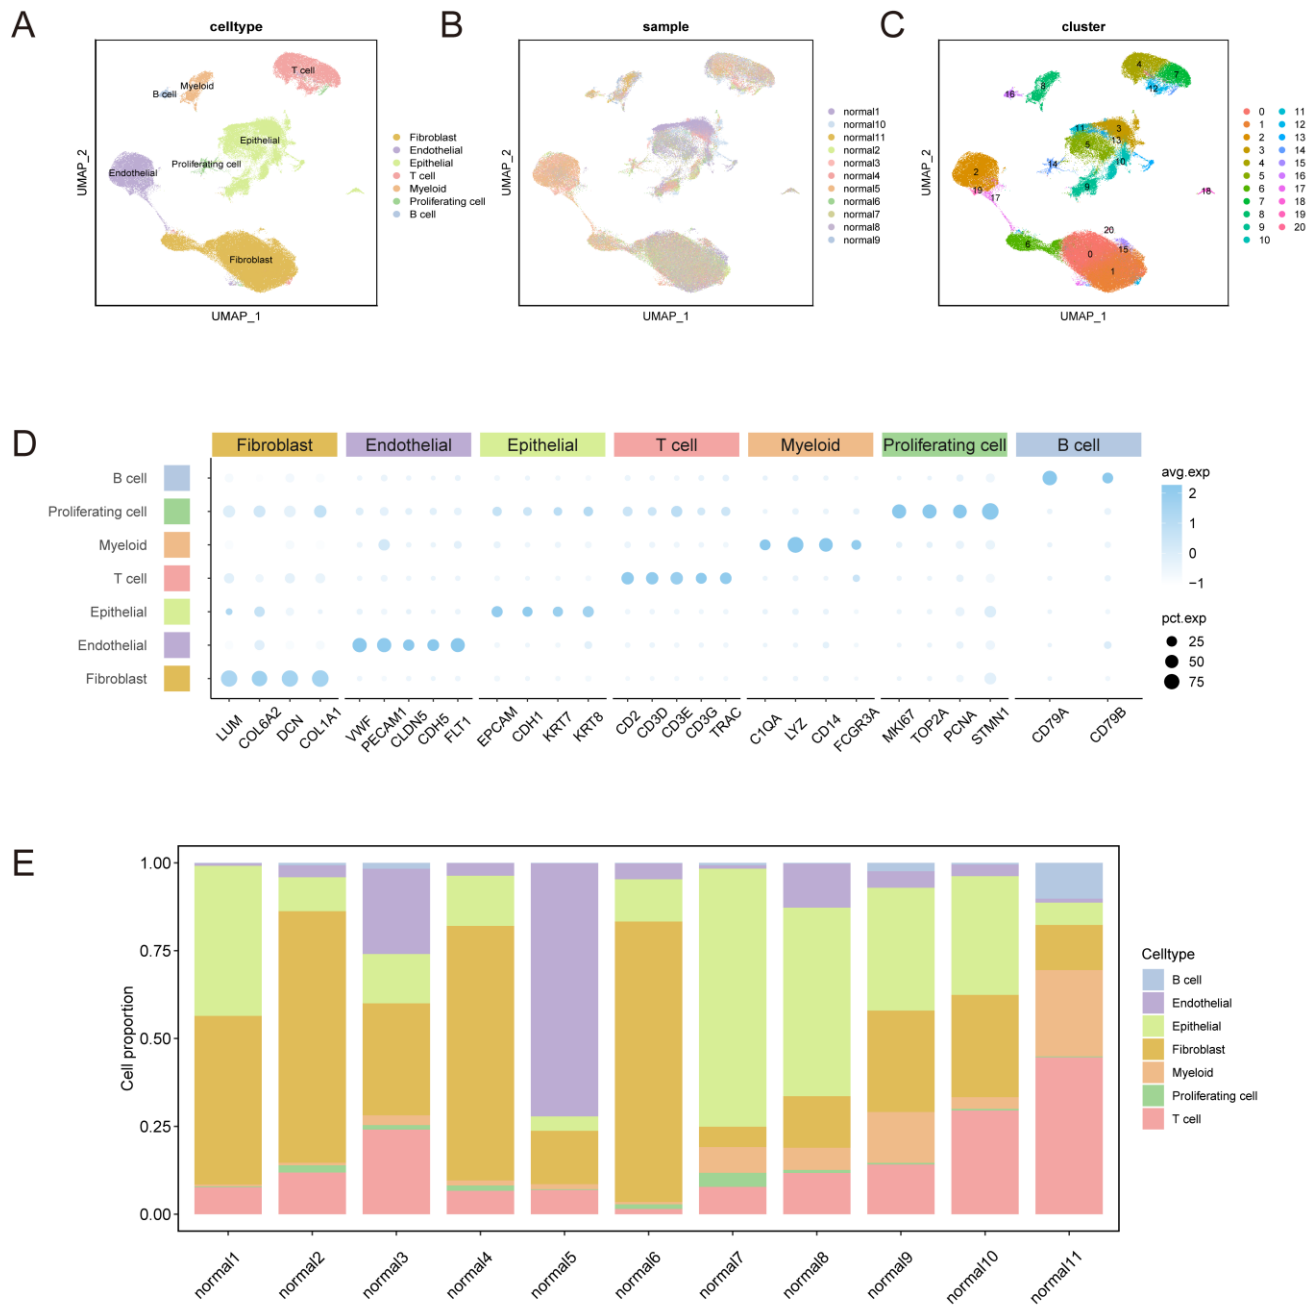

**Supplementary Fig. S3** Single-cell landscape of 11 normal endometrial samples **A-C** UMAP plot of single-cell transcriptomes: **A** coded by annotated cell types. **B**, ratified by patient origin. **C** segregated by unsupervised clustering. **D** The dot plot of the representative marker genes for the cell types. **E** Stacked bar plot showing the proportional distribution of major cell types across individual patients.

## Supplementary Tables

**Supplementary TableS1** The detailed information for 7 ScRNAseq EC sample and 11 ScRNAseq normal endometrial samples

**Supplementary TableS2** The 200 EMT\_related genes used to EMT score

**Supplementary TableS3** The top500 genes of trajectory analysis

**Supplementary TableS4** The cNMF anlysis outcome of MP1

**Supplementary TableS5** The 47 EMT related genes

**Supplementary TableS6** The genes highly expressed in tumor epithelial cells (8403) and in tumor fibroblasts (3974)

**Supplementary TableS7** The detailed information for siRNAs sequence and RT-qPCR Primers of INHBA and POSTN and related Antibody
