# Supplementary material for: Single-Cell analysis Uncovers the Dynamic Process of EMT in Endometrial Cancer and the Core Roles of INHBA and POSTN in Regulating Tumor Malignant Phenotypes
Source: Research Square preprint supplement (doi:10.21203/rs.3.rs-8267986/v1), 2026-02-03
Supplement: Supplementary file 2 [file d0e76004e970bf7f25dd3a31.xlsx]

## Sheet: EC sample
TableS1：Detailed information for ScRNAseq EC sample.
Sample	Age	Stage	Grade	Race	GEO Dataset	GEO Sample
patient1	70	IA	2	African American	GSE173682	GSM5276933
patient2	70	IA	3	Caucasian		GSM5276934
patient3	70	IA	2	Caucasian		GSM5276935
patient4	49	IA	1	Caucasian		GSM5276936
patient5	62	IA	1	Caucasian		GSM5276937
patient6	71	IA	3	Asian	GSE251923	GSM7990051
patient7	63	IB	1	Asian		GSM7990052

## Sheet: Normal  samples
TableS1：Detailed information for ScRNAseq normal endometrial samples.
Sample	GEO Dataset	GEO Sample
C1	GSE179640	GSM6102532
C2		GSM6102533
C3		GSM6102534
C4	GSE213216	GSM6574512
C5		GSM6574528
C6		GSM6574534
C7		GSM6574536
C8		GSM6574542
C9		GSM6574543
C10		GSM6574544
C11		GSM6574539
