# Supplementary material for: Single-Cell analysis Uncovers the Dynamic Process of EMT in Endometrial Cancer and the Core Roles of INHBA and POSTN in Regulating Tumor Malignant Phenotypes
Source: Research Square preprint supplement (doi:10.21203/rs.3.rs-8267986/v1), 2026-02-03
Supplement: Supplementary file 3 [file fdd0db1323d1851e8bbae1a4.xlsx]

## Sheet: epi_high_sig
TableS6：8403 significantly upregulated genes in tumor epithelium
gene	p_val	avg_log2FC	pct.1	pct.2	p_val_adj
SCGB1A1	0	11.6185913868924	0.069	0	0
FOXA1	0	9.0853830256511	0.155	0.001	0
BBOX1-AS1	0	6.79079344878084	0.058	0.001	0
MNX1	0	6.59966352472625	0.055	0.001	0
ZNF385B	0	6.50270362541692	0.116	0.009	0
OLFM4	0	6.47505587703547	0.101	0.005	0
TRIM36	0	6.27984515251818	0.076	0.005	0
HOXC9	0	6.21201887946641	0.053	0.001	0
TUBA3D	0	6.20400187035983	0.1	0.004	0
DEFB4A	0	6.20096364373857	0.117	0.002	0
RAET1L	0	6.07551217409587	0.057	0.001	0
MOBP	0	6.00924108598273	0.071	0.001	0
HOXC10	0	6.00260000889836	0.063	0.001	0
JSRP1	0	5.9442003196363	0.12	0.003	0
TFAP2A	0	5.90579175166212	0.153	0.006	0
KIF1A	0	5.85859875033787	0.195	0.007	0
IFI30	0	5.71696146921745	0.16	0.011	0
PPP4R4	0	5.25918077608659	0.06	0.002	0
TNNT2	0	5.15213353072633	0.073	0.003	0
PPARG	0	5.14922417231731	0.232	0.026	0
C2orf54	0	5.04441391356993	0.111	0.006	0
AMH	0	4.89016685407217	0.059	0.002	0
MTRNR2L1	0	4.78497745706126	0.202	0.018	0
IGHG1	0	4.66561532647824	0.157	0.003	0
SBSN	0	4.62538638902457	0.073	0.003	0
SCD	0	4.57713648043375	0.226	0.06	0
BCL2L2	0	4.53817652186143	0.215	0.06	0
SLC7A11	0	4.50975946225321	0.189	0.016	0
AL031316.1	0	4.48229	0.057	0.002	0
FGFBP1	0	4.47993237264668	0.116	0.02	0
NUS1	0	4.46711980767441	0.394	0.123	0
CSF3	0	4.44949265777717	0.253	0.018	0
PTPRS	0	4.42131667387841	0.141	0.032	0
EHBP1L1	0	4.3658758401056	0.284	0.071	0
CCL20	0	4.26953222569821	0.247	0.026	0
AC128688.2	0	4.23477504909634	0.071	0.004	0
RESF1	0	4.18692	0.25	0.037	0
STC2	0	4.18034659621701	0.215	0.017	0
DAPP1	0	4.17013483048758	0.143	0.027	0
KCNG1	0	4.16639831536291	0.14	0.033	0
TAC1	0	4.1238812051707	0.085	0.005	0
IL1RN	0	4.10183138357321	0.083	0.005	0
HDAC9	0	4.09863002647985	0.26	0.022	0
BEX5	0	4.08255110184248	0.174	0.053	0
TXNDC5	0	4.07789721292997	0.201	0.051	0
ATP2C2	0	4.06002552831724	0.197	0.048	0
MBOAT1	0	4.0493350647477	0.147	0.033	0
SEL1L3	0	4.02431407073246	0.303	0.11	0
PABPC1L	0	4.00835785269449	0.154	0.039	0
IL23A	0	3.98270384664774	0.219	0.034	0
GJB2	0	3.98217169262633	0.153	0.014	0
NPAS3	0	3.94879241119008	0.269	0.098	0
BCL2A1	0	3.83037612527514	0.165	0.006	0
MYEOV	0	3.81975683663445	0.104	0.01	0
AP1S3	0	3.81181874608139	0.19	0.032	0
WBP1	0	3.7483664188956	0.14	0.031	0
KRT23	0	3.74332523251175	0.311	0.078	0
LAMC2	0	3.74321310638798	0.417	0.119	0
KIAA1324	0	3.72280986172593	0.535	0.15	0
TFPI2	0	3.71610639441044	0.604	0.199	0
NT5E	0	3.69351773336247	0.382	0.114	0
PCNX2	0	3.68572528197463	0.193	0.054	0
CXCL1	0	3.65845532222318	0.209	0.066	0
SLC25A38	0	3.63281019600932	0.331	0.121	0
SEMA7A	0	3.62356387254177	0.14	0.006	0
NECTIN3	0	3.61879285748026	0.255	0.079	0
PITX1	0	3.59979590433302	0.098	0.002	0
GALNT4	0	3.58092098223673	0.147	0.033	0
BAIAP2L1	0	3.56487090494743	0.283	0.063	0
EDEM3	0	3.53601907854458	0.297	0.106	0
TM7SF3	0	3.53439623186607	0.257	0.117	0
AC068491.3	0	3.52567956672867	0.151	0.019	0
PRSS8	0	3.51721320423247	0.454	0.133	0
SPOCD1	0	3.5062201837148	0.125	0.01	0
CDH2	0	3.4873876557375	0.155	0.026	0
PARVG	0	3.48189634154102	0.115	0.02	0
MSTO1	0	3.46087855781872	0.151	0.043	0
FAM3B	0	3.45109857905444	0.076	0.007	0
MYEF2	0	3.37370601119034	0.23	0.088	0
TMPRSS2	0	3.3730394334131	0.119	0.021	0
PTGS2	0	3.36264779727059	0.263	0.051	0
C3orf52	0	3.34950430904727	0.157	0.022	0
STX6	0	3.34544813473753	0.284	0.092	0
TXNRD1	0	3.33054748969784	0.427	0.133	0
NEK6	0	3.29781376173043	0.265	0.095	0
GDA	0	3.29649311448616	0.29	0.139	0
POSTN	0	3.2942313755897	0.262	0.09	0
ATP1B1	0	3.27631950151905	0.561	0.231	0
OSGIN1	0	3.27150506199779	0.11	0.009	0
VNN1	0	3.24105723733294	0.157	0.04	0
ICA1	0	3.2294927895392	0.42	0.17	0
TFF1	0	3.21947387139632	0.088	0.007	0
PHLDA2	0	3.20679021932437	0.402	0.073	0
TUFT1	0	3.19919718731848	0.208	0.04	0
AC022144.1	0	3.17199217233819	0.124	0.018	0
CXCL8	0	3.15832118737024	0.431	0.266	0
ATP8B1	0	3.15588570512601	0.31	0.118	0
NECTIN4	0	3.15354355450836	0.22	0.053	0
EDN1	0	3.13639797540542	0.267	0.101	0
HOXA9	0	3.11446520095602	0.153	0.016	0
ATP2C1	0	3.1128	0.365	0.211	0
BCAR3	0	3.11211402535639	0.246	0.056	0
TRIB3	0	3.11181338208868	0.098	0.007	0
LEMD1	0	3.09442275391949	0.134	0.029	0
TTC9	0	3.0769931303808	0.205	0.049	0
STXBP6	0	3.07645265421398	0.391	0.19	0
PATJ	0	3.07323361089302	0.402	0.188	0
CHAC1	0	3.06438471948738	0.071	0.006	0
HAPLN3	0	3.03656442130893	0.209	0.053	0
PRAME	0	3.03482532772834	0.298	0.091	0
ZNF664	0	3.02889471889039	0.315	0.16	0
TGFA	0	3.01512854816046	0.131	0.025	0
GSR	0	3.00936168084036	0.293	0.135	0
TNFRSF21	0	3.00862747622029	0.221	0.055	0
PPARD	0	3.00316162796681	0.175	0.045	0
CSTF3	0	3.00115342545394	0.257	0.105	0
KDM7A	0	3.0003411025885	0.335	0.114	0
AL512274.1	0	2.98866658925564	0.142	0.031	0
F2RL1	0	2.98400097873189	0.279	0.082	0
ANO1	0	2.94886749855565	0.337	0.096	0
OCLN	0	2.94593944767625	0.379	0.15	0
TFF3	0	2.93508974681581	0.424	0.1	0
SERPINA5	0	2.93310263897033	0.273	0.109	0
FADS2	0	2.92884585086002	0.133	0.03	0
ABCC1	0	2.92567095609732	0.206	0.072	0
F11R	0	2.92422831775672	0.479	0.169	0
GDF15	0	2.9157406730888	0.324	0.097	0
ISG20	0	2.91491269636586	0.429	0.187	0
MREG	0	2.91007504680128	0.233	0.061	0
LRP8	0	2.88971601275529	0.105	0.016	0
CDK5RAP3	0	2.87436472967252	0.419	0.211	0
CCNA1	0	2.86935907363421	0.17	0.035	0
KHDC4	0	2.86497095874741	0.423	0.16	0
VLDLR	0	2.86257673373952	0.213	0.08	0
EN2	0	2.86092488427196	0.108	0.02	0
BCL2L1	0	2.85387885698615	0.352	0.148	0
RAB3IP	0	2.84783394954011	0.352	0.129	0
TIMM23	0	2.84601013529557	0.233	0.09	0
CCND1	0	2.84574628846991	0.476	0.204	0
VHL	0	2.84356367909824	0.251	0.093	0
PLAU	0	2.84283	0.225	0.03	0
RANBP9	0	2.83106086202831	0.277	0.1	0
S100A2	0	2.82073034837309	0.253	0.086	0
STT3A	0	2.8083282457069	0.342	0.187	0
SRPK2	0	2.80115740641558	0.417	0.189	0
DSG2	0	2.78865225953841	0.389	0.187	0
TRIO	0	2.78367488567286	0.247	0.08	0
RASGRP3	0	2.78282221759314	0.108	0.012	0
EIF4EBP2	0	2.78137178318727	0.351	0.189	0
TNIP1	0	2.77727070597691	0.479	0.184	0
HIPK2	0	2.77223863067333	0.319	0.152	0
DNAH14	0	2.76562762777692	0.227	0.086	0
SFN	0	2.76264085565619	0.31	0.11	0
KCNN4	0	2.75628016291535	0.203	0.038	0
TLE1	0	2.75592891879075	0.548	0.209	0
UBE2Q1	0	2.75417096158962	0.282	0.121	0
HBS1L	0	2.7529852856359	0.308	0.127	0
CD40	0	2.75274673356813	0.158	0.03	0
SYNGR2	0	2.74924	0.413	0.207	0
CCNL2	0	2.74915499864493	0.444	0.202	0
CDCP1	0	2.74743270191518	0.296	0.113	0
LINC01588	0	2.73991190632694	0.145	0.017	0
TMEM183A	0	2.73704143760774	0.435	0.179	0
ST14	0	2.73657683685172	0.391	0.166	0
IVNS1ABP	0	2.73354700713304	0.449	0.233	0
MMP26	0	2.72484730085697	0.187	0.061	0
GPAT3	0	2.71926782883943	0.081	0.004	0
TACSTD2	0	2.71454983180331	0.577	0.25	0
MDM2	0	2.70462158455945	0.381	0.155	0
KCNK1	0	2.69490936338334	0.393	0.185	0
DUSP10	0	2.69449532372021	0.17	0.045	0
NQO1	0	2.69372381532408	0.19	0.055	0
MAST4	0	2.67596357912532	0.269	0.103	0
ARHGAP26	0	2.67255856129868	0.363	0.129	0
SLC47A1	0	2.67191774484644	0.268	0.085	0
H1F0	0	2.66588189650494	0.423	0.201	0
LIPG	0	2.65818779869519	0.105	0.016	0
GCLM	0	2.64655391934938	0.307	0.108	0
AC095055.1	0	2.63967682831688	0.071	0.006	0
PAM	0	2.63448143807169	0.503	0.293	0
CPM	0	2.63312190184618	0.456	0.195	0
AL357060.1	0	2.62831803835482	0.082	0.009	0
UHMK1	0	2.62583300076656	0.388	0.176	0
VEZF1	0	2.62361860422646	0.444	0.204	0
CXCL3	0	2.62003541249755	0.287	0.078	0
ATP2B4	0	2.61713574535771	0.497	0.239	0
SUCO	0	2.6121864579633	0.383	0.155	0
SLC12A7	0	2.60720528468528	0.247	0.075	0
PMAIP1	0	2.60536301528824	0.424	0.155	0
MB21D2	0	2.58442064498956	0.127	0.025	0
DAP	0	2.58188708835126	0.469	0.194	0
PIP5K1A	0	2.5816569516811	0.337	0.106	0
HMGA1	0	2.58061120286251	0.433	0.241	0
KRT15	0	2.57375557475747	0.086	0.006	0
EPHX1	0	2.57005519369363	0.463	0.251	0
ALCAM	0	2.55855940851662	0.461	0.218	0
TRABD2A	0	2.55778730222171	0.09	0.007	0
TNFRSF10A	0	2.54739	0.164	0.046	0
PITPNC1	0	2.54119241546107	0.304	0.089	0
PIGR	0	2.53944683814042	0.532	0.27	0
LAD1	0	2.52536754414445	0.305	0.147	0
CNST	0	2.51341215821186	0.235	0.077	0
DUSP4	0	2.50941402708872	0.367	0.122	0
ARHGEF2	0	2.4999017061018	0.303	0.104	0
WDR82	0	2.49632089505746	0.424	0.228	0
WDR26	0	2.49402146578582	0.382	0.152	0
DUSP12	0	2.4909506417129	0.243	0.088	0
ESYT2	0	2.48578330858547	0.285	0.13	0
ADIPOR1	0	2.47188688449086	0.406	0.17	0
HIST1H1C	0	2.46990579478919	0.302	0.148	0
CCNC	0	2.45086664991793	0.504	0.207	0
OCIAD2	0	2.44879581759919	0.627	0.278	0
FBXO28	0	2.44178623424348	0.254	0.103	0
MAP2K1	0	2.43143528940362	0.26	0.098	0
ARHGAP30	0	2.43033615235766	0.106	0.008	0
COG3	0	2.43027155117423	0.228	0.088	0
PLAUR	0	2.41428078396664	0.428	0.179	0
CCL2	0	2.41415543597691	0.205	0.059	0
SERINC2	0	2.41081479865728	0.566	0.247	0
WNT2B	0	2.40306538055144	0.14	0.033	0
FOXC1	0	2.39301534254468	0.12	0.023	0
SDCBP2	0	2.38972235845901	0.259	0.07	0
SRPK1	0	2.38910165800514	0.425	0.155	0
STX3	0	2.38552506298249	0.347	0.121	0
CDK16	0	2.37286098048599	0.304	0.15	0
MED24	0	2.3706265122498	0.274	0.117	0
FAT1	0	2.36762013864131	0.269	0.095	0
KLF5	0	2.36534863727138	0.456	0.202	0
MISP	0	2.36519862546854	0.223	0.082	0
WFDC2	0	2.35708842425935	0.809	0.397	0
BBC3	0	2.35361983319698	0.263	0.075	0
TFRC	0	2.35028827263199	0.32	0.155	0
NMB	0	2.34810212927533	0.264	0.107	0
RAB11FIP1	0	2.34795949716542	0.467	0.213	0
EHF	0	2.34756203996451	0.498	0.233	0
ZNF644	0	2.33806676942921	0.431	0.22	0
CD82	0	2.3341301555016	0.246	0.094	0
AKAP12	0	2.33059475786184	0.277	0.122	0
MAL2	0	2.32932673268991	0.482	0.22	0
ZNF562	0	2.32317228336188	0.256	0.11	0
NOV	0	2.3167714410625	0.183	0.047	0
NAV2	0	2.31475338118144	0.246	0.102	0
EGLN1	0	2.31045095996463	0.277	0.122	0
IGSF8	0	2.30736529824071	0.327	0.156	0
SLC50A1	0	2.30618413971587	0.302	0.144	0
PAX8	0	2.30302	0.541	0.252	0
SLMAP	0	2.3003393167019	0.354	0.141	0
CAPN2	0	2.29686888661492	0.53	0.226	0
DAP3	0	2.28445719687358	0.434	0.198	0
TMEM132A	0	2.28369237015747	0.334	0.117	0
ALDH3A2	0	2.28210539824154	0.38	0.182	0
ANKHD1	0	2.27488911774522	0.242	0.077	0
RNF115	0	2.27343281848578	0.423	0.221	0
YES1	0	2.26905503863683	0.36	0.161	0
ABRACL	0	2.25875754979368	0.497	0.226	0
PHF5A	0	2.25748510148504	0.348	0.137	0
MACC1	0	2.25593241042181	0.286	0.134	0
ASPH	0	2.24563297622817	0.48	0.219	0
CHD2	0	2.23783620998843	0.474	0.221	0
HES4	0	2.23298515198256	0.431	0.208	0
TOR1AIP1	0	2.22353395979803	0.356	0.141	0
GALNT2	0	2.21556543877133	0.267	0.108	0
S100A10	0	2.20937090182465	0.526	0.342	0
SPINT1	0	2.20513429199149	0.514	0.234	0
PEA15	0	2.20338803837181	0.428	0.185	0
RIPK2	0	2.20255471469257	0.393	0.167	0
AC009549.1	0	2.20108651394009	0.099	0.014	0
CDH1	0	2.19853572815722	0.445	0.216	0
CXCL16	0	2.19270424398266	0.324	0.14	0
NPLOC4	0	2.18556105228655	0.271	0.11	0
TNFRSF10B	0	2.18259536418781	0.353	0.106	0
DNAJC5	0	2.17652973793208	0.227	0.087	0
MBD2	0	2.17173895826402	0.51	0.247	0
IL11	0	2.16961617506405	0.1	0.013	0
DSP	0	2.16729497012031	0.504	0.237	0
TM4SF1	0	2.1663838201344	0.451	0.16	0
PRCC	0	2.1656159525505	0.329	0.13	0
RALA	0	2.16502506238441	0.435	0.198	0
HYOU1	0	2.16380238617095	0.298	0.138	0
HOXA10	0	2.15888227600494	0.234	0.057	0
CASP7	0	2.15883941447295	0.262	0.101	0
FNBP1L	0	2.15250908118729	0.401	0.227	0
STT3B	0	2.1473037101901	0.401	0.224	0
MAPKBP1	0	2.14521575737637	0.15	0.04	0
SMAD3	0	2.14387672537522	0.311	0.102	0
SETD5	0	2.14354532699756	0.388	0.191	0
AEN	0	2.13401724778652	0.185	0.053	0
B4GALT5	0	2.12788276340368	0.353	0.136	0
RAB4A	0	2.12550250066769	0.439	0.23	0
B4GALT3	0	2.12340935362697	0.247	0.103	0
NET1	0	2.12039883451412	0.328	0.124	0
ITCH	0	2.11854009193325	0.306	0.137	0
MYO6	0	2.11570765094499	0.489	0.225	0
SMS	0	2.10105526654265	0.547	0.257	0
CLDN4	0	2.09790315666329	0.578	0.317	0
ETV6	0	2.07945557481013	0.297	0.126	0
FAM136A	0	2.07894753140951	0.362	0.188	0
CTSS	0	2.07652356710038	0.348	0.159	0
EZR	0	2.06815255392045	0.595	0.307	0
TM9SF3	0	2.05579820235371	0.583	0.326	0
ADAR	0	2.05349185502292	0.443	0.237	0
LARP4	0	2.05307681552918	0.326	0.142	0
FOXO3	0	2.04995019945162	0.394	0.189	0
CSF1	0	2.04307076529431	0.215	0.066	0
TRAF4	0	2.04000784728151	0.4	0.165	0
SAT1	0	2.03838457289205	0.82	0.691	0
CDKN2A	0	2.02365319695832	0.163	0.042	0
PTBP3	0	2.01619401038696	0.433	0.221	0
AKT1	0	2.01526546180027	0.336	0.162	0
ADAM9	0	2.01314299857045	0.422	0.185	0
CHTOP	0	2.00923716266395	0.417	0.208	0
PRKAG2	0	2.00560910570606	0.298	0.127	0
SDC4	0	1.9866694525639	0.489	0.218	0
NENF	0	1.98192979358396	0.514	0.28	0
B4GALT1	0	1.98028975536675	0.548	0.294	0
GOLM1	0	1.98019282885188	0.446	0.243	0
B3GALNT2	0	1.97977542210667	0.246	0.08	0
SERPINB9	0	1.97159428728711	0.213	0.056	0
ERO1A	0	1.9701027364269	0.461	0.229	0
ACBD3	0	1.96581841822779	0.452	0.213	0
KCMF1	0	1.96458579291381	0.443	0.194	0
SESTD1	0	1.9615074873455	0.429	0.207	0
UAP1	0	1.9574568246178	0.329	0.152	0
KRT19	0	1.95621380608365	0.529	0.368	0
TOMM34	0	1.95507307694547	0.204	0.071	0
PFKP	0	1.95328397807789	0.312	0.143	0
FAM3C	0	1.94371681208983	0.606	0.313	0
PLEKHA5	0	1.94356398559943	0.481	0.252	0
FNTA	0	1.93854011884363	0.426	0.239	0
TRIP12	0	1.93336895945532	0.354	0.189	0
2025-03-07	0	1.92407121960275	0.395	0.206	0
TNC	0	1.92360896142261	0.209	0.051	0
ZNF655	0	1.91104822651192	0.341	0.175	0
PRELID3B	0	1.90323416797434	0.358	0.154	0
RAB25	0	1.89818699338414	0.454	0.228	0
SUZ12	0	1.89232185077177	0.345	0.175	0
CMPK1	0	1.89088855156934	0.464	0.275	0
LPGAT1	0	1.88035804371035	0.341	0.17	0
ASNS	0	1.87356798889345	0.175	0.05	0
NCEH1	0	1.8663089923732	0.22	0.082	0
BACE2	0	1.86486484863009	0.451	0.231	0
STK24	0	1.86064576131458	0.379	0.2	0
APP	0	1.85907377208393	0.666	0.361	0
TXNL4A	0	1.85874604624029	0.52	0.266	0
ELF3	0	1.85868	0.57	0.276	0
GTPBP4	0	1.85453949367603	0.426	0.184	0
NOP16	0	1.85230015201017	0.247	0.104	0
IBTK	0	1.85039291181184	0.361	0.168	0
TRIM11	0	1.84657935502312	0.204	0.067	0
ITSN2	0	1.84402777298718	0.317	0.147	0
CAB39	0	1.83502587662286	0.309	0.126	0
NRP2	0	1.83343332746488	0.248	0.076	0
SEC11C	0	1.83323776195314	0.553	0.29	0
CLPTM1L	0	1.82976423120326	0.369	0.196	0
EEF1G	0	1.81989505136137	0.347	0.183	0
ADSS	0	1.81507840232485	0.383	0.213	0
CFLAR	0	1.81413200882261	0.512	0.257	0
OS9	0	1.80968888808373	0.461	0.27	0
AFDN	0	1.80283261913152	0.538	0.274	0
KRT8	0	1.79925134894033	0.576	0.299	0
EPRS	0	1.79901243450557	0.43	0.228	0
SMAD2	0	1.79349795377896	0.387	0.218	0
NPC1	0	1.79221029431637	0.205	0.07	0
RNASEH1	0	1.79128560900854	0.267	0.099	0
RNF145	0	1.79017675184768	0.353	0.148	0
SLC7A5	0	1.79003409009197	0.248	0.068	0
GPATCH2L	0	1.78503198531334	0.358	0.167	0
SOX17	0	1.77970357364803	0.519	0.258	0
TICAM1	0	1.76809428930954	0.231	0.071	0
SLC38A1	0	1.76631704583278	0.348	0.16	0
SLC35B1	0	1.76604281509467	0.414	0.186	0
ACSL3	0	1.76548065875057	0.349	0.158	0
SDE2	0	1.75916697705108	0.246	0.082	0
PDXK	0	1.75306501977646	0.45	0.232	0
DNAJC10	0	1.75293644559917	0.467	0.264	0
UBE2J1	0	1.74533491472963	0.396	0.195	0
GON4L	0	1.73793462529967	0.333	0.155	0
KRAS	0	1.72366280592573	0.358	0.177	0
RAB10	0	1.71588049903016	0.465	0.254	0
USP14	0	1.7158105534199	0.408	0.197	0
ABHD2	0	1.71383202166016	0.279	0.129	0
AZIN1	0	1.71355749386434	0.438	0.201	0
EMC4	0	1.7102502002907	0.461	0.252	0
CD24	0	1.70251959361288	0.799	0.43	0
OGA	0	1.70050156078751	0.41	0.22	0
EHD4	0	1.6975287775328	0.277	0.101	0
CD9	0	1.69739615539141	0.692	0.326	0
TTC3	0	1.69702230120475	0.587	0.37	0
SPINT2	0	1.68852947359613	0.719	0.309	0
SCGB2A1	0	1.67938667179134	0.677	0.329	0
MPC2	0	1.67849484776426	0.46	0.258	0
ANXA3	0	1.67824482108117	0.332	0.169	0
GTF3C5	0	1.67733284182771	0.231	0.083	0
USP53	0	1.67516890441564	0.434	0.233	0
CLU	0	1.67462279325234	0.582	0.338	0
TRAPPC3	0	1.67319349080852	0.415	0.208	0
MTHFD2	0	1.67278458273817	0.316	0.102	0
WDR45B	0	1.67210016683276	0.422	0.231	0
COPA	0	1.66690139058823	0.481	0.251	0
UGCG	0	1.66669925074381	0.466	0.243	0
SF3B4	0	1.65861330645353	0.392	0.184	0
CD2AP	0	1.65193494097254	0.43	0.244	0
FAM129A	0	1.65136953232186	0.146	0.016	0
TRIM16	0	1.6502559996541	0.262	0.088	0
MAP4K4	0	1.64720508036183	0.397	0.181	0
CEBPG	0	1.64687768195473	0.267	0.097	0
DESI2	0	1.64431189908732	0.329	0.152	0
FHL2	0	1.63826939797303	0.365	0.129	0
APH1A	0	1.63564956050303	0.473	0.253	0
AP3D1	0	1.62341736826419	0.353	0.171	0
FAM49B	0	1.6207852324622	0.331	0.151	0
KMT2C	0	1.61130988124289	0.47	0.266	0
HCCS	0	1.58972892382579	0.231	0.092	0
NSFL1C	0	1.58720864985872	0.403	0.206	0
STX12	0	1.58618700975106	0.358	0.168	0
RAP2B	0	1.58094519107218	0.313	0.108	0
CKAP4	0	1.58045733194611	0.442	0.22	0
LRRFIP2	0	1.57856887260947	0.393	0.211	0
ZNF267	0	1.56902566049575	0.229	0.071	0
IMPAD1	0	1.56882926295218	0.341	0.177	0
TNFRSF12A	0	1.56858865999332	0.479	0.256	0
SRPRA	0	1.56777110549288	0.389	0.212	0
CD47	0	1.56516913784732	0.523	0.258	0
TGIF1	0	1.5610424532976	0.457	0.266	0
HSPA14.1	0	1.55915503052594	0.196	0.067	0
SLC25A33	0	1.55910810140639	0.276	0.113	0
YRDC	0	1.5557995694765	0.283	0.092	0
UCHL3	0	1.55545573292774	0.324	0.164	0
SRA1	0	1.55410970459197	0.34	0.171	0
CITED4	0	1.55343139659165	0.445	0.238	0
MIR4435-2HG	0	1.54939671352096	0.326	0.119	0
RNF126	0	1.54640174596407	0.329	0.126	0
ZFAND1	0	1.54468364878258	0.332	0.17	0
LAMP1	0	1.54242867951283	0.512	0.311	0
KRT18	0	1.53965382374965	0.494	0.327	0
AKAP17A	0	1.53894172601184	0.297	0.132	0
TIPRL	0	1.53712382618787	0.364	0.195	0
NDUFV2	0	1.53385769022105	0.579	0.329	0
BRIX1	0	1.52392419939911	0.35	0.173	0
MDK	0	1.52047809441148	0.773	0.534	0
ACADVL	0	1.51963576257817	0.564	0.296	0
GNB1	0	1.51962739450289	0.517	0.28	0
REEP3	0	1.51692639142946	0.361	0.182	0
TIMM17A	0	1.5106	0.426	0.182	0
ARL8A	0	1.50309442835665	0.337	0.155	0
MAPK1IP1L	0	1.50041933559375	0.444	0.243	0
TBL1XR1	0	1.49908919936758	0.449	0.264	0
RNF114	0	1.49341935259431	0.42	0.204	0
MSX1	0	1.49338759656373	0.519	0.3	0
IL4R	0	1.49285246994223	0.169	0.047	0
DAZAP1	0	1.48813690393809	0.373	0.169	0
HDGF	0	1.48464831705588	0.522	0.288	0
COPB2	0	1.47959976561218	0.448	0.263	0
TSPAN3	0	1.47852288014142	0.452	0.262	0
DCUN1D5	0	1.47833253898557	0.337	0.158	0
ITPKC	0	1.47647796520652	0.246	0.077	0
ARL8B	0	1.46342997601114	0.356	0.173	0
NPDC1	0	1.46192978472015	0.488	0.282	0
CRELD2	0	1.45428675241392	0.394	0.206	0
RIT1	0	1.44830413463589	0.261	0.109	0
ANXA11	0	1.44699912080355	0.532	0.304	0
UFM1	0	1.44519228928195	0.565	0.308	0
HOTAIRM1	0	1.44316163814836	0.187	0.05	0
METTL9	0	1.44288241122284	0.513	0.301	0
COL18A1	0	1.44183586608102	0.537	0.289	0
PLPP2	0	1.43300269084238	0.503	0.266	0
VEGFA	0	1.43127150678714	0.381	0.182	0
CADM1	0	1.42864103878696	0.427	0.224	0
RGS10	0	1.42096249089088	0.446	0.255	0
GORASP2	0	1.42055690562741	0.365	0.193	0
EPCAM	0	1.41966294136362	0.712	0.299	0
TCERG1	0	1.41927188043381	0.312	0.142	0
NFKB2	0	1.41223385301594	0.283	0.105	0
PRPF40A	0	1.41170604387446	0.501	0.276	0
EIF4EBP1	0	1.40957952013107	0.298	0.126	0
STK17A	0	1.40696475918877	0.264	0.115	0
IFNGR2	0	1.40543997384964	0.46	0.223	0
GLUL	0	1.40096975125744	0.584	0.386	0
TP53BP2	0	1.39824463039861	0.272	0.102	0
MARCKSL1	0	1.39772803462762	0.594	0.359	0
WDR43	0	1.39476396349288	0.356	0.178	0
FGFR1	0	1.39028406916247	0.4	0.216	0
LY6K	0	1.3868344221922	0.253	0.089	0
C1orf43	0	1.38649182756524	0.516	0.295	0
EPHA2	0	1.38134445485841	0.239	0.079	0
ARPC5L	0	1.38056351620479	0.425	0.223	0
JUP	0	1.37880943250013	0.411	0.23	0
PSMD6	0	1.37010001522136	0.408	0.207	0
SNRPA1	0	1.36455910031959	0.395	0.199	0
AKAP8L	0	1.35485704609024	0.355	0.172	0
MTRNR2L12	0	1.34861517726431	0.51	0.257	0
PGM3	0	1.3440520343903	0.353	0.175	0
HGS	0	1.33998793244126	0.32	0.15	0
PERP	0	1.33856258997635	0.678	0.314	0
DNTTIP2	0	1.33840854975307	0.41	0.208	0
CHMP2B	0	1.33218309300439	0.422	0.226	0
MYO1B	0	1.33202302045944	0.214	0.078	0
LYST	0	1.33023912191994	0.215	0.077	0
CHMP4B	0	1.32800891258621	0.428	0.233	0
MAP2K3	0	1.31607866910012	0.453	0.181	0
ACOT9	0	1.3117039152779	0.304	0.123	0
STK40	0	1.31057822073308	0.237	0.077	0
DNAJB11	0	1.28637607975972	0.419	0.212	0
RAB14	0	1.28308674958238	0.461	0.272	0
CD46	0	1.27700276920344	0.543	0.329	0
FNBP4	0	1.27453562188312	0.439	0.22	0
IL32	0	1.27239890828304	0.357	0.176	0
POLR1D	0	1.26899223441135	0.548	0.314	0
DAZAP2	0	1.26435090571618	0.488	0.296	0
CLDN3	0	1.26401848645866	0.601	0.321	0
CLDN7	0	1.2579802017822	0.508	0.266	0
YTHDF2	0	1.25400527101668	0.455	0.263	0
RHOF	0	1.25393733843948	0.211	0.073	0
VASP	0	1.2516582461811	0.354	0.186	0
BCL10	0	1.25026553468295	0.377	0.185	0
RUNX1	0	1.24979604423323	0.282	0.119	0
KDM5B	0	1.24872238533368	0.465	0.227	0
CDV3	0	1.24802919600977	0.49	0.274	0
SYNJ2	0	1.23995379005884	0.205	0.073	0
PELO	0	1.2384759625814	0.27	0.119	0
G3BP2	0	1.23364586918183	0.41	0.237	0
TUBA1C	0	1.22997267811528	0.518	0.316	0
EIF2S1	0	1.22280001680697	0.375	0.197	0
BID	0	1.21816155571656	0.256	0.109	0
MPRIP	0	1.21209168734882	0.348	0.161	0
TOMM20	0	1.21161467704153	0.661	0.413	0
LTBP1	0	1.21067621943164	0.222	0.069	0
MT-ND4L	0	1.2092974440341	0.887	0.602	0
ITGB8	0	1.20424572387473	0.509	0.312	0
LAPTM4B	0	1.20389697132826	0.539	0.292	0
PSMD12	0	1.19645451251561	0.43	0.229	0
PFDN2	0	1.19340790610452	0.569	0.35	0
IGKC	0	1.18980567323338	0.185	0.036	0
RPN2	0	1.1873746367229	0.549	0.328	0
ELOVL5	0	1.17839636602453	0.321	0.139	0
C1orf52	0	1.17800392489536	0.295	0.134	0
BRD4	0	1.17570935302382	0.456	0.241	0
HNRNPA3	0	1.17233063300652	0.721	0.444	0
AREG	0	1.17082209805285	0.167	0.044	0
XBP1	0	1.1693651660634	0.731	0.466	0
CDC42EP1	0	1.16433069126572	0.229	0.058	0
TAF10	0	1.1577806427463	0.466	0.271	0
AKIRIN2	0	1.15537061039161	0.304	0.145	0
LCP1	0	1.14934394873505	0.212	0.066	0
FOSL1	0	1.14548288952228	0.27	0.056	0
OAZ1	0	1.13593265394691	0.816	0.563	0
UFC1	0	1.13382810281729	0.601	0.37	0
ILF2	0	1.13364676111932	0.528	0.329	0
PPP2R2A	0	1.13131208938085	0.39	0.206	0
HNRNPD	0	1.12992105550073	0.569	0.332	0
UBE2H	0	1.12144552647823	0.518	0.316	0
CSNK1E	0	1.11867721247573	0.444	0.244	0
ANKLE2	0	1.1116084402068	0.401	0.191	0
EIF3A	0	1.11037969000444	0.585	0.348	0
BRI3	0	1.1089223437548	0.625	0.373	0
ANXA2	0	1.09176787731224	0.724	0.558	0
JARID2	0	1.08561450074556	0.276	0.108	0
SRP19	0	1.08184848046591	0.479	0.276	0
ARID4B	0	1.07627646729558	0.499	0.297	0
MAFG	0	1.06770168905324	0.329	0.124	0
DYNLT1	0	1.05729431532448	0.605	0.356	0
SRP9	0	1.05599351271551	0.603	0.366	0
INSIG1	0	1.04747667036763	0.22	0.074	0
RHOC	0	1.04706178090335	0.554	0.324	0
SPTSSA	0	1.04609939540329	0.423	0.235	0
PEBP1	0	1.04594457800587	0.754	0.464	0
KIF5B	0	1.04167756802692	0.525	0.324	0
RCAN1	0	1.01928165753327	0.279	0.113	0
TMEM165	0	1.01326062407718	0.568	0.334	0
MAPKAPK2	0	0.987285668343357	0.329	0.16	0
PSMD11	0	0.985926442660754	0.395	0.221	0
ARPP19	0	0.983786595488556	0.427	0.246	0
PLK2	0	0.98249275114271	0.311	0.115	0
U2SURP	0	0.978003844853394	0.463	0.282	0
BAZ1A	0	0.974166847017702	0.389	0.218	0
AGO2	0	0.973013854291171	0.358	0.179	0
NANS	0	0.969176543191022	0.42	0.245	0
CCNI	0	0.968175499715427	0.743	0.486	0
JTB	0	0.964182265626833	0.563	0.356	0
STRAP	0	0.958334896859307	0.498	0.301	0
ADRM1	0	0.941050947042704	0.408	0.24	0
NUCKS1	0	0.933052462127926	0.648	0.409	0
RIOK3	0	0.911805225663313	0.385	0.21	0
PDIA3	0	0.910123091316325	0.684	0.453	0
UPP1	0	0.905922340043501	0.258	0.094	0
EIF4H	0	0.904206538755105	0.5	0.295	0
RELB	0	0.897754855247799	0.258	0.093	0
SQSTM1	0	0.897450760612731	0.612	0.421	0
UBE2I	0	0.895373203788564	0.521	0.326	0
ARF1	0	0.891157875735767	0.67	0.45	0
UBE2D2	0	0.86976506106489	0.539	0.336	0
GSPT1	0	0.865773823803593	0.433	0.26	0
FTH1	0	0.861446798698454	0.973	0.931	0
CSDE1	0	0.852067681861895	0.598	0.383	0
RAC1	0	0.842036392816039	0.62	0.444	0
ETS1	0	0.796352630077916	0.274	0.103	0
CHCHD2	0	0.771521209725893	0.718	0.566	0
PRRC2C	0	0.744556047571415	0.577	0.394	0
LDLR	0	0.682527969220104	0.357	0.165	0
ADAMTS9	0	0.569249387071243	0.322	0.134	0
NFKBIB	0	0.49337347820911	0.254	0.1	0
ADM	0	0.482163124640913	0.261	0.097	0
CREB5	0	0.401594423294891	0.286	0.102	0
SPHK1	0	0.386572136407234	0.27	0.073	0
TNFRSF18	0	0.374895790014997	0.129	0.028	0
ZC3H12A	0	0.307276476026759	0.298	0.123	0
IER5	0	0.172933794686531	0.306	0.126	0
EI24	6.18597775098327e-307	1.75384837031637	0.428	0.257	1.86012350972067e-302
HPGD	7.16145115345375e-307	2.51431403463412	0.123	0.028	2.15344836184354e-302
MUC1	1.06967769962171e-306	1.79063535376543	0.457	0.263	3.21652084276248e-302
AMT	1.17092786611383e-306	4.01942387488211	0.106	0.02	3.52098009340429e-302
UBA2	3.86294714019884e-306	1.34996552626171	0.378	0.211	1.16158820505779e-301
ITPRID2	1.12702141125576e-305	2.98284542623662	0.122	0.027	3.38895338364606e-301
ERBIN	1.73943114554082e-305	2.04180151550353	0.386	0.221	5.23046945464123e-301
SH3YL1	1.85078106505788e-305	1.27132046352897	0.48	0.276	5.56529866262904e-301
KIAA0040	8.41658062063242e-305	1.96122861385454	0.257	0.113	2.53086579262417e-300
RPF2	1.04672702419814e-304	1.67208474593044	0.357	0.194	3.1475081617638e-300
MYO5B	1.06526369476593e-304	2.75506507138319	0.23	0.094	3.20324793016115e-300
BIRC3	8.40226018294542e-304	0.953760483306804	0.294	0.134	2.52655963701169e-299
CPD	9.110102772259e-304	2.3969100883266	0.336	0.179	2.73940790361828e-299
PSME4	1.08118452672492e-303	1.12531377001864	0.315	0.153	3.25112187186185e-299
SPIN1	3.44487300061729e-303	2.34520034727371	0.402	0.237	1.03587331128562e-298
ELP3	3.64127502169376e-303	3.61293639276517	0.335	0.189	1.09493139902331e-298
GABPB1	4.62193030381755e-303	1.54111108598083	0.191	0.065	1.38981444235794e-298
C12orf75	4.98266414011558e-303	1.59823777312868	0.447	0.254	1.49828710693275e-298
RPRD1A	7.29865219265222e-303	2.10364306189886	0.311	0.156	2.19470471433052e-298
DDX21	1.11650124953547e-302	0.710254995764066	0.481	0.311	3.35731925735315e-298
ASAP1	4.4627723267508e-302	1.24972855225442	0.249	0.104	1.34195563865397e-297
GLRX3	5.06394770608208e-302	0.963180067553129	0.379	0.215	1.52272907521888e-297
PNN	8.1635036026975e-302	0.866272331315646	0.536	0.356	2.45476553333114e-297
DNAJC2	9.120917863509e-302	1.00578170525701	0.343	0.183	2.74266000155716e-297
BUD23	1.2289724906702e-301	1.29486994496736	0.426	0.25	3.69552027944531e-297
ARCN1	1.8235204874702e-301	1.40898781613179	0.365	0.198	5.48332610582289e-297
KCNK6	4.04581950591781e-301	0.780993957632671	0.308	0.144	1.21657792542949e-296
LAMB3	8.88279940404609e-301	1.83222547335138	0.318	0.166	2.67105778079666e-296
EDN2	1.46882355496135e-300	4.27388575515867	0.09	0.014	4.41675242976879e-296
PIK3R3	3.40720653181017e-300	2.28726825775437	0.172	0.055	1.02454700411532e-295
CAMK2N1	1.71794292378959e-299	1.06613189865233	0.35	0.178	5.1658543718353e-295
MDM4	2.73289629531955e-299	1.38637346791355	0.438	0.26	8.21781916002589e-295
GPATCH2	5.18396063103075e-299	1.56732825275539	0.305	0.15	1.55881696175095e-294
AMIGO2	6.66155757891414e-299	3.14628906090689	0.257	0.119	2.00313036397948e-294
TARBP1	7.061844797722e-299	2.70318026936193	0.211	0.082	2.12349673067501e-294
SLK	1.53639612860121e-298	0.936698335956369	0.367	0.2	4.61994315870384e-294
CCR8	3.59119609368085e-298	13.4486468861617	0.045	0	1.07987266536983e-293
CCT6A	3.61352386195533e-298	1.05064993971966	0.498	0.31	1.08658662528997e-293
HEXB	1.78730246307103e-297	1.69611639173233	0.346	0.184	5.37441850645459e-293
ARF6	2.03365476709628e-297	0.934325138421051	0.422	0.251	6.11519988465851e-293
CCSER2	4.26808770197797e-297	1.99836367855503	0.292	0.141	1.28341397198478e-292
RASA2	5.03086960625094e-297	2.06843623950471	0.251	0.108	1.51278249059966e-292
TUBA3E	6.69218781170202e-297	4.61008486051459	0.055	0.002	2.0123408749788e-292
CCDC47	6.87294344562185e-297	1.39290534525991	0.43	0.256	2.06669409409849e-292
FNDC3B	1.30665275353404e-296	1.50985949347901	0.48	0.293	3.92910482987685e-292
ERGIC3	2.74951314846851e-296	1.20181381353956	0.487	0.298	8.2677860374448e-292
CFAP47	3.66827933344539e-296	5.00213742732343	0.091	0.015	1.10305159556703e-291
GARS	3.86650102187466e-296	1.34844488491746	0.298	0.147	1.16265685727771e-291
POGK	4.72658108510877e-296	2.35983296462644	0.227	0.093	1.42128293229221e-291
EIF6	7.29841480739852e-296	1.01407111609925	0.465	0.305	2.19463333258473e-291
GALNT3	3.4569669623986e-295	2.15599459990319	0.345	0.183	1.03950996559326e-290
EFHD2	4.37456791103708e-295	1.10098530852036	0.331	0.175	1.31543257084885e-290
TBC1D9B	2.83939486113855e-294	3.1867185167915	0.253	0.116	8.53806034744363e-290
SHB	2.86354050519537e-294	2.22369183349833	0.213	0.083	8.61066629912248e-290
CYTH2	2.17544806428368e-293	1.69773831595106	0.377	0.212	6.54157232930102e-289
UBE2L3	2.1769597045385e-293	0.764022979443035	0.49	0.315	6.54611783154727e-289
USF1	2.18905542500126e-293	3.48100190504927	0.157	0.049	6.58248966297879e-289
INPP1	2.59512435232812e-293	1.15032268726222	0.231	0.095	7.80353892745066e-289
SESN2	4.03626958428542e-293	1.09252128668238	0.155	0.046	1.21370626399463e-288
CLCC1	6.93058886051297e-293	3.12792054945381	0.233	0.1	2.08402807035625e-288
ENAH	1.32768599691302e-292	1.70329426978869	0.359	0.196	3.99235179271745e-288
YOD1	2.29821778573284e-292	1.10305828332637	0.177	0.058	6.91074088169864e-288
CRY1	5.86214020416634e-292	1.89085787617861	0.219	0.086	1.76274555939282e-287
SRP68	8.0073531430317e-292	1.77040258028765	0.294	0.144	2.40781109010963e-287
AC108463.3	9.17207053974361e-292	3.08194457105414	0.061	0.004	2.7580416113009e-287
TARS	1.04999421920873e-291	1.02774474275959	0.318	0.165	3.15733261716065e-287
HNRNPH3	1.17469686221806e-291	0.861296496980168	0.54	0.351	3.53231346468972e-287
TOMM5	2.97406944084685e-291	1.92808818345283	0.333	0.174	8.94302680862649e-287
UCHL5	6.13688310797846e-291	2.09016427806229	0.253	0.113	1.84536075056912e-286
ENSA	7.12143177895641e-291	1.00330335242434	0.472	0.292	2.14141453593219e-286
CRTC2	5.74547657344738e-290	2.04299200392289	0.199	0.074	1.72766480563563e-285
S100A3	6.29649421821267e-290	0.595182434072854	0.112	0.024	1.89335581141655e-285
GNL3	7.44313725580612e-290	1.41189712447526	0.393	0.229	2.2381513728209e-285
RNF4	1.33236049230405e-289	1.40696011629321	0.256	0.114	4.00640800035828e-285
MED15	3.81832021959357e-289	1.30028987725031	0.262	0.117	1.14816889003179e-284
LPCAT1	6.24012671908338e-289	1.88740317965815	0.177	0.06	1.87640610442837e-284
KCTD3	1.04732032241499e-288	2.78523106652352	0.233	0.1	3.14929220950189e-284
KRT86	6.00033186246732e-288	1.10288685886895	0.086	0.013	1.80429979104392e-283
SLC43A1	8.30944904187218e-288	3.70252007412595	0.117	0.027	2.49865132689097e-283
LGALSL	8.64999176078062e-288	1.3509487606275	0.187	0.065	2.60105252246673e-283
NT5C2	1.20248667991476e-287	2.31759459130007	0.258	0.117	3.61587744650368e-283
MAPK8	1.57728172025122e-287	1.54364373415992	0.256	0.114	4.74288613279542e-283
ELK3	2.8116023337962e-287	0.521576350403692	0.229	0.091	8.45448821772517e-283
BSDC1	3.17949779148829e-287	1.64363952233868	0.305	0.153	9.56074985900529e-283
COBL	3.68520097667594e-287	2.59839575407852	0.254	0.114	1.10813993368646e-282
KIF2A	5.10079719587718e-287	1.59762005760743	0.348	0.19	1.53380971680027e-282
MLPH	1.12069330366205e-286	2.5661755648901	0.317	0.169	3.36992476411177e-282
RHEX	2.01546479248238e-286	2.50776195441018	0.354	0.194	6.06050263099453e-282
RNF39	2.88348786805004e-286	2.5015169331439	0.116	0.026	8.67064801922646e-282
LYPD3	5.34769098177848e-286	1.11866829348584	0.106	0.021	1.60805067822079e-281
UBE2E3	5.43080594964276e-286	1.50515266389657	0.459	0.278	1.63304334905758e-281
LINC00958	1.30278025088608e-285	1.9811146105031	0.216	0.087	3.91746021441445e-281
ANGPTL4	3.27798686143183e-285	2.56353995846417	0.109	0.023	9.85690649232552e-281
RELCH	3.83258219184465e-285	3.84743706461557	0.078	0.01	1.15245746508769e-280
TENT2	4.99607862317119e-285	2.47598540913726	0.254	0.115	1.50232084198758e-280
LGALS4	5.3806233733803e-285	4.51795009884279	0.054	0.003	1.61795344837546e-280
MLEC	6.01478006702586e-285	1.34187973233794	0.471	0.287	1.80864436615468e-280
UBA6	6.03934449108611e-285	1.70919056544628	0.312	0.158	1.81603088846959e-280
DIS3	2.58464865010378e-284	1.57818185781504	0.29	0.141	7.77203849086206e-280
RRBP1	3.34924064176307e-284	0.757038523252213	0.545	0.353	1.00711666097816e-279
HK2	5.01019194890457e-284	2.41634382750809	0.127	0.032	1.50656471903561e-279
UBE2Q2	5.27398528106887e-284	2.41379199827506	0.286	0.142	1.58588737401741e-279
UBE3C	1.17471720075032e-283	2.4815300311452	0.245	0.109	3.5323746226562e-279
RAB22A	1.60458967619828e-283	1.22473673522704	0.31	0.159	4.82500115632824e-279
ELAVL1	3.00879052890111e-283	1.09969397589791	0.383	0.219	9.04743312040563e-279
TMED9	3.52831829444517e-283	0.733743793862265	0.499	0.323	1.06096531113966e-278
CNN2	4.4675000381238e-283	1.68470647547196	0.352	0.191	1.34337726146383e-278
CTSZ	7.87640851538162e-283	1.36646406338163	0.446	0.267	2.36843604057525e-278
DCAF12	1.14768099014515e-282	2.21018532733906	0.234	0.1	3.45107673736647e-278
TMEM11	2.68411732919368e-282	1.52442407253626	0.302	0.153	8.0711408088854e-278
OTUB2	1.76375092967475e-281	2.43751005368403	0.099	0.019	5.30359904553198e-277
PGRMC2	2.06707902949522e-281	2.60828355642137	0.377	0.226	6.21570664169214e-277
TRPM2	2.98239109075712e-281	3.90623842753574	0.071	0.008	8.96805000990666e-277
TMEM41B	3.24134406144309e-281	1.32548793680678	0.308	0.155	9.74672159275937e-277
TSPAN13	1.47907521642305e-280	1.77925337520109	0.317	0.164	4.44757917578411e-276
SSR2	2.2146247473574e-280	0.794512436355935	0.731	0.556	6.65937661530369e-276
TMED4	1.05892708243405e-279	1.1392620560972	0.479	0.298	3.18419373687919e-275
TPD52L2	1.54495244014117e-279	0.947637437079347	0.325	0.169	4.64567198750451e-275
ANXA2R	1.73978770698745e-279	2.37592429967172	0.08	0.011	5.23154163491126e-275
CYTOR	2.03837275922605e-279	0.481281816834025	0.35	0.18	6.12938688699272e-275
CYSTM1	5.2206431937596e-279	0.717423835326552	0.475	0.305	1.56984740836351e-274
TMEM238	1.37668053826451e-278	1.50400588089573	0.398	0.213	4.13967837856137e-274
ZFAND3	1.48377946066667e-278	1.62124066988544	0.275	0.131	4.46172483822467e-274
TMSB4X	2.03900901796474e-278	0.783517182268878	0.974	0.95	6.13130011701998e-274
CORO1C	2.30521754841758e-278	0.60140202749521	0.244	0.101	6.93178916809167e-274
OSBPL2	5.38535433696342e-278	2.22382286358411	0.218	0.089	1.6193760491249e-273
MAPK6	6.63044625663213e-278	0.684661404785554	0.357	0.185	1.99377518936928e-273
PMEPA1	8.01544539193142e-278	0.825999502690202	0.397	0.228	2.41024442935378e-273
TMEM123	1.54452099104074e-277	1.25423873252056	0.482	0.291	4.64437462005949e-273
GOLGA8B	2.50746041861603e-277	2.45445710568488	0.206	0.081	7.53993347877841e-273
TRIM2	3.26812116619342e-277	2.59676420455322	0.35	0.199	9.82724034674363e-273
AC004130.1	5.36693152862858e-277	2.89055425032814	0.145	0.043	1.61383631065861e-272
LSR	5.83012066709623e-277	1.30199754960414	0.385	0.224	1.75311728459584e-272
SEMA3B	6.12310708070761e-277	1.60976885807439	0.319	0.172	1.84121829916878e-272
TMEM120B	7.83674556358659e-277	0.90212248468887	0.238	0.1	2.35650939097049e-272
GNG10	1.20961107505043e-276	2.92087995059209	0.163	0.054	3.63730050267663e-272
FDX1	1.36720767380785e-276	1.1557873087844	0.339	0.188	4.1111934751402e-272
MND1	3.48515129117011e-276	5.21344828605728	0.062	0.005	1.04798499325485e-271
EFNB1	3.98434448468539e-276	1.26329532953312	0.152	0.046	1.1980923865449e-271
FOXN2	7.02680028429598e-276	1.52969562608897	0.161	0.051	2.1129588454878e-271
EDEM1	1.22662148021844e-275	2.54162662098728	0.213	0.086	3.68845079101684e-271
ECE1	1.42801437986429e-275	1.15463780370465	0.314	0.159	4.29403924025193e-271
SNAPC1	1.53212391939824e-275	1.69642240768178	0.265	0.126	4.60709662563052e-271
RNPS1	2.61992642007586e-275	0.728109968440972	0.437	0.275	7.8781187451681e-271
SH3BGRL3	6.65423564978128e-275	0.656631088147454	0.599	0.424	2.00092865988923e-270
GAD1	1.58920539585304e-274	4.57455226561442	0.057	0.004	4.7787406253301e-270
UCKL1-AS1	1.58966593607826e-274	1.84266680312712	0.101	0.02	4.78012546978733e-270
SMYD2	2.30957038523416e-274	2.96686592420728	0.248	0.115	6.94487814839911e-270
LMTK3	1.42033660038931e-273	2.81052254100833	0.108	0.024	4.27095215737064e-269
UCP2	1.854142212491e-273	2.76275909868018	0.381	0.228	5.57540563296042e-269
HIF1A	2.77000745819797e-273	1.06387913708878	0.466	0.311	8.32941242680129e-269
LSMEM2	5.3156091392495e-273	4.05744736949093	0.055	0.003	1.59840366817232e-268
HMOX2	6.48559081398039e-273	1.22906465906281	0.313	0.166	1.9502171577639e-268
CNPY2	1.21145087506492e-272	1.10207124516039	0.512	0.318	3.6428327813202e-268
ALKAL2	5.30327856674476e-272	2.56793171410876	0.258	0.121	1.59469586502015e-267
SGPP2	1.88428747428398e-271	2.73668076516589	0.19	0.071	5.66605243517193e-267
PLXNB2	2.15475287882761e-271	2.0749341723907	0.387	0.229	6.47934190663462e-267
CIAO2A	2.63730306794908e-271	4.1594885391342	0.078	0.011	7.93037032532289e-267
SORBS2	3.17797142470574e-271	2.12590339897881	0.333	0.184	9.55616007409016e-267
DHX15	1.72836878865063e-270	1.24216984415703	0.393	0.229	5.19720494747243e-266
HOXA7	2.2876696981427e-270	2.60304869461174	0.055	0.003	6.87902278231509e-266
DNAJA4	3.477771426344e-270	1.10025373464569	0.235	0.098	1.04576586790164e-265
PDCD6	4.46489226292526e-270	0.906795766337967	0.503	0.319	1.34259310346163e-265
TINAGL1	5.14321441730588e-270	2.19493715133103	0.251	0.115	1.54656457528388e-265
TNFSF14	3.43613979896579e-269	1.74035840805312	0.08	0.012	1.03324723754901e-264
NCKAP1	3.50918127226532e-269	1.46186423044496	0.41	0.246	1.05521080857018e-264
RNF7	1.15516395418614e-268	1.06415317080642	0.505	0.328	3.47357801023774e-264
BAG1	3.02656986034837e-268	1.21682815988768	0.485	0.305	9.10089557006756e-264
CDC42SE1	1.03322306451882e-267	1.08278521849849	0.356	0.194	3.1069017550081e-263
CLIP1	1.4935470250114e-267	1.15647546003977	0.365	0.206	4.49109590420927e-263
AC005324.3	3.5042805254842e-267	6.6334400798477	0.046	0.001	1.0537371540131e-262
EID3	5.32277227603788e-267	2.21575225326975	0.103	0.022	1.60055762340459e-262
MYH9	7.0289821944391e-267	0.657000492292839	0.478	0.309	2.11361494586784e-262
ZSCAN2	1.36136016081115e-266	2.67496687938592	0.116	0.029	4.09361000355914e-262
ZNF800	6.88994929822824e-266	1.5711913214846	0.266	0.127	2.07180775397723e-261
HEBP2	7.68000982473807e-266	0.79986675158628	0.52	0.32	2.30937895429874e-261
ALYREF	7.78425488905185e-266	1.14957598087118	0.277	0.137	2.34072544513789e-261
SAR1B	1.30864110421521e-265	1.35026033415823	0.351	0.196	3.93508380037512e-261
PODXL2	2.37524297435576e-265	2.12133072954978	0.198	0.077	7.14235562388777e-261
CD68	2.63858275975713e-265	0.998509139197646	0.206	0.081	7.9342183585897e-261
DIPK1B	3.3240041320418e-265	4.4813852305798	0.072	0.009	9.99528042504969e-261
PTK2	7.79164367187751e-265	1.55541705150599	0.319	0.17	2.34294725213357e-260
SEC13	1.05658163221416e-264	1.33530227526015	0.353	0.198	3.17714096806798e-260
YBX1	1.15546036822245e-264	0.608990189139812	0.697	0.52	3.4744693272449e-260
GNL2	1.58760526375846e-264	1.42568843133776	0.286	0.144	4.77392902812169e-260
API5	1.98121546804009e-264	2.29657798144319	0.297	0.155	5.95751491239656e-260
CDR2	4.04207212340791e-264	1.99485187212405	0.136	0.039	1.21545108750876e-259
NEU4	4.32243269094294e-264	5.7351874569893	0.043	0.001	1.29975551016654e-259
PILRB	7.9667506548004e-264	2.86394768115732	0.244	0.114	2.39560192189848e-259
TJP1	1.05754764131052e-263	1.06841958284959	0.439	0.273	3.18004575742072e-259
BIK	2.81745491601924e-263	2.63646097888666	0.143	0.043	8.47208693246985e-259
BCCIP	6.38568541292036e-263	1.98236964173656	0.271	0.134	1.92017560366515e-258
C1QTNF12	2.01036406928765e-262	3.12471311765409	0.055	0.004	6.04516475634795e-258
NXT2	2.02080546903624e-262	2.82413380556894	0.16	0.054	6.07656204539196e-258
CD74	4.05771700092953e-262	0.654033582166376	0.568	0.327	1.22015550217951e-257
TMEM254-AS1	5.18216860598772e-262	3.37802178450968	0.067	0.008	1.55827809982051e-257
COA6	1.46050193424239e-261	1.43448399397588	0.35	0.199	4.39172931626687e-257
PTAFR	1.47591113305148e-261	3.64999924299648	0.067	0.007	4.43806477708581e-257
KPNA4	1.75883494549667e-261	0.974252286637857	0.389	0.231	5.28881668110848e-257
DENND3	8.66350839051066e-261	1.49758182470486	0.132	0.037	2.60511697302655e-256
FGD6	9.18270665571683e-261	1.57190883045323	0.168	0.058	2.76123989137405e-256
SWAP70	1.47700196400854e-260	1.60323892849736	0.274	0.135	4.44134490577367e-256
BET1	8.14023527565673e-260	2.4849611796155	0.32	0.179	2.44776874738998e-255
MEAF6	1.09431899212994e-259	1.03228014296501	0.43	0.265	3.29061720933472e-255
MTCL1	1.20560912221856e-259	1.52635836290044	0.108	0.024	3.62526663051121e-255
TAB2	2.0001227653296e-259	2.00568596558343	0.246	0.113	6.01436915534612e-255
HOMER2	2.28621453992614e-259	1.56727132503233	0.395	0.223	6.87464712155791e-255
ULBP2	2.30630313311845e-259	3.76423772221813	0.045	0.001	6.93505352128717e-255
YTHDC1	3.38952410999472e-259	0.919961790371449	0.42	0.256	1.01922989987541e-254
EWSR1	3.94160985072386e-259	0.894968165284092	0.424	0.257	1.18524208211266e-254
USP12	8.90285293741184e-259	1.05641697480106	0.237	0.103	2.67708787827974e-254
TSPAN15	1.4465696821523e-258	2.12892484293454	0.305	0.16	4.34983503423198e-254
TBX18	1.7590006250007e-258	6.53402823279654	0.041	0	5.28931487937711e-254
LAMTOR3	4.75425648093757e-258	1.96371263594942	0.325	0.18	1.42960492381793e-253
PPP1R1B	4.92519227346646e-258	4.63829448787449	0.102	0.023	1.48100531663137e-253
CERT1	7.02965172372944e-258	3.03741309635129	0.108	0.026	2.11381627332544e-253
LY6G5B	1.73916801406889e-257	5.08939690877394	0.06	0.005	5.22967821830516e-253
LAMP5	3.31156613036663e-257	1.87294249658649	0.117	0.029	9.95787935401246e-253
AGFG1	4.99789314250484e-257	1.66233698847122	0.3	0.156	1.50286646795121e-252
KHDRBS3	5.51640034317805e-257	1.88796006085105	0.202	0.082	1.65878158319364e-252
ARFGAP3	7.33602919487926e-257	1.2098642680623	0.43	0.268	2.20594397890019e-252
YARS	7.3733443282929e-257	1.38658828509164	0.215	0.091	2.21716463951768e-252
ZDHHC9	1.83191648475984e-256	1.58818230479661	0.255	0.122	5.50857286967283e-252
TMED2	2.43851419882801e-256	0.818215428579602	0.593	0.399	7.33261219587583e-252
STARD10	5.14049879293861e-256	1.99959528842152	0.322	0.174	1.54574798703664e-251
DPM1	7.09848674113041e-256	1.25282568527286	0.328	0.18	2.13451496305791e-251
EFNA1	2.53935013972493e-255	2.52863207312827	0.286	0.149	7.63582587015285e-251
SLC7A1	3.00121688246658e-255	2.10452297299343	0.297	0.154	9.02465916557701e-251
TNFSF13	9.72756927352418e-255	4.70379459464248	0.064	0.007	2.92508008054872e-250
DUSP5	1.00207886443742e-254	0.124440031600437	0.263	0.112	3.01325114536332e-250
GRN	1.13081433005256e-254	1.13117986622092	0.535	0.342	3.40035869046805e-250
ATP6V1G1	1.61531975544364e-254	0.612658837631836	0.591	0.419	4.85726650461901e-250
TMEM159	1.2872529634236e-253	1.41858532105713	0.217	0.092	3.87076966101476e-249
IL1A	3.28138980441728e-253	2.10781352571779	0.07	0.009	9.86713914188275e-249
ARTN	9.32295070427603e-253	2.57577546515039	0.09	0.018	2.8034112767758e-248
TMEM51	1.73023833801274e-252	2.21912689439624	0.132	0.038	5.2028266824043e-248
PTPN12	2.20767764661948e-252	1.92954790519637	0.347	0.199	6.63848668338477e-248
TRAF3IP2	6.57632043089655e-252	1.71886372687476	0.278	0.139	1.97749955357059e-247
CYB5A	7.84067517598055e-252	1.16289870354683	0.464	0.281	2.35769102541735e-247
ZNF350	2.28930949034065e-251	2.61684260490515	0.148	0.048	6.88395363745432e-247
URI1	2.46842149097031e-251	1.74317469524752	0.384	0.231	7.42254342334772e-247
TASOR	3.30181937229339e-251	3.05599237515211	0.096	0.02	9.92857085248623e-247
RAB12	1.11530393246138e-250	2.85790923867474	0.147	0.048	3.35371892491137e-246
CYP3A5	1.13167775464881e-250	2.26347755170743	0.156	0.053	3.40295500822896e-246
PITPNB	1.62354432720893e-250	1.04428984308309	0.354	0.205	4.88199779191726e-246
SRP54	4.78852462065566e-250	1.28175844878981	0.374	0.221	1.43990935343116e-245
TAF13	4.81186634440566e-250	1.4245568642384	0.251	0.118	1.44692820976278e-245
PORCN	5.10876594028246e-250	2.83642557611257	0.218	0.096	1.53620591824294e-245
NCBP2	6.64456078078341e-250	1.6350845144154	0.37	0.218	1.99801942678157e-245
FAM102A	1.4914287268317e-249	1.55512814417635	0.232	0.104	4.48472618158292e-245
SCNN1A	1.89142100175454e-249	2.58309106769882	0.332	0.189	5.6875029522759e-245
CD276	2.84556699147401e-249	1.07611499775426	0.288	0.144	8.55661994336236e-245
SQOR	4.52965838327545e-249	1.73506728675201	0.239	0.113	1.36206827585093e-244
RBM33	5.21448816557856e-249	2.22255999830143	0.288	0.15	1.56799659138947e-244
SYTL3	6.71736308567471e-249	2.24445125013757	0.181	0.068	2.01991107986239e-244
MAP3K9	7.89794443974802e-249	3.13631272107195	0.11	0.027	2.37491189303223e-244
CTNNA1	9.55095303845379e-249	0.751535670552615	0.488	0.311	2.87197157866305e-244
CLINT1	1.13449513315439e-248	1.0511536621325	0.413	0.255	3.41142686539525e-244
NOP58	1.77449400761841e-248	0.857394490736096	0.381	0.227	5.33590348090855e-244
RASEF	2.00078924272643e-248	1.79534065025303	0.172	0.062	6.01637325287837e-244
ENOPH1	3.22875235975366e-248	2.20308435233092	0.251	0.121	9.70885834577925e-244
IFI6	3.24430110533315e-248	1.87462667804854	0.357	0.205	9.75561342373679e-244
SLC35E1	5.93222553218839e-248	1.69883062533718	0.276	0.14	1.78382021752905e-243
SRP72	8.37216985186226e-248	0.796176404629141	0.415	0.26	2.51751147445498e-243
MFF	1.61067055882703e-247	1.5455067785035	0.391	0.236	4.84328637039289e-243
COPS2	1.62628375374252e-247	0.937730443995903	0.406	0.246	4.89023524750376e-243
PDZD8	1.6447984797006e-247	2.00867561749445	0.39	0.239	4.9459090284597e-243
ALPG	2.64952663386423e-247	8.99735314493511	0.05	0.003	7.96712658802973e-243
PCDH7	3.09307539622313e-247	2.4609002051669	0.311	0.175	9.30087771644296e-243
SYAP1	4.2114526373782e-247	0.966098670615665	0.443	0.279	1.26638380805963e-242
NCSTN	4.33896818614179e-247	2.4234096864547	0.318	0.181	1.30472773357284e-242
PSMC1	5.07196111978229e-247	0.767178	0.416	0.271	1.52513870871854e-242
LONRF1	6.50251995645254e-247	1.21487047384053	0.202	0.082	1.95530775090528e-242
AL160408.3	9.25712061556264e-247	9.47472253273723	0.038	0	2.78361616909969e-242
C1orf198	1.07036985072943e-246	2.08980207599998	0.183	0.071	3.2186021411434e-242
FAM107B	1.3264354952197e-246	1.11483074722521	0.412	0.25	3.98859153412565e-242
PPP4C	1.69763270076409e-246	0.862203591543327	0.43	0.273	5.10478153119763e-242
REV1	2.53827303853133e-246	2.11283338491737	0.268	0.133	7.63258702686372e-242
PSMD7	5.17955744737392e-246	0.854705583080446	0.414	0.264	1.55749292442534e-241
SERPINB1	1.28169003754348e-245	2.76430911958678	0.358	0.238	3.85404194289323e-241
GOLGA7	1.85003056223109e-245	1.54645380908512	0.316	0.173	5.56304190062889e-241
ARL14	2.02459743155323e-245	3.43066296288787	0.055	0.004	6.08796447668057e-241
2025-03-05	2.09178148800445e-245	1.53783141935052	0.341	0.194	6.28998693442938e-241
SPATA5L1	4.3126085339676e-245	2.27260726131697	0.142	0.045	1.29680138616406e-240
MPP6	5.33802636106362e-245	3.48658604624418	0.123	0.035	1.60514452677183e-240
CELF1	6.36076823797069e-245	1.07353906892787	0.399	0.242	1.91268300915779e-240
RNF149	6.7642028893111e-245	1.44646	0.332	0.187	2.03399580881585e-240
TUBB2B	8.40685820795687e-245	0.984721966677668	0.108	0.026	2.52794226313263e-240
AXIN1	1.72501304690244e-244	1.98690875509213	0.16	0.056	5.18711423203562e-240
PLCG2	1.93152395108264e-244	2.18497232682919	0.26	0.129	5.8080925209055e-240
MESP1	3.59121944843277e-244	2.74550297155074	0.094	0.02	1.07987968814373e-239
TPR	6.94883883526924e-244	0.937770668082871	0.469	0.302	2.08951583776546e-239
CNBP	8.90632563734425e-244	0.626397166591563	0.553	0.375	2.67813211914941e-239
ESRRA	1.50369550861958e-243	1.44086553297586	0.233	0.106	4.52161239441907e-239
THAP9-AS1	6.35445370428617e-243	0.164022582056943	0.242	0.11	1.91078422887885e-238
GSK3B	7.66281683742341e-243	2.00694221594456	0.26	0.129	2.30420902301322e-238
CAPN15	1.03373463133133e-242	1.60500555632144	0.17	0.062	3.1084400364133e-238
IRF2BP2	1.20960195011044e-242	0.640016290912412	0.455	0.299	3.63727306398209e-238
GPBP1	1.23628576834347e-242	0.744275583906628	0.532	0.353	3.7175113054088e-238
NUTF2	2.97410371623801e-242	0.911205022120598	0.369	0.221	8.9431298747277e-238
SEC23B	3.65171091794121e-242	1.95949263948923	0.271	0.137	1.09806947302492e-237
PLAA	5.93887020029885e-242	2.16279409611352	0.201	0.084	1.78581826922986e-237
FSD1L	1.46622126593928e-241	2.88820716456886	0.148	0.049	4.40892734667943e-237
PAFAH1B1	1.66411128522513e-241	0.930250729042562	0.411	0.255	5.00398263467196e-237
ARIH2	1.8735728997233e-241	1.33664935866321	0.29	0.151	5.63383370946795e-237
PAIP1	2.01541002115316e-241	1.32126475731097	0.402	0.242	6.06033793360755e-237
ITGA2	2.6007877528621e-241	2.50240600400785	0.213	0.095	7.82056877285633e-237
ODC1	1.25123037051625e-240	0.932015992331966	0.405	0.255	3.76244972414236e-236
UTP6	1.7025973163492e-240	1.30687261000215	0.275	0.141	5.11971013026204e-236
HES6	1.05886369659758e-239	1.55058229397445	0.17	0.062	3.18400313566892e-235
MARK3	2.66685293814184e-239	0.940031991154839	0.342	0.193	8.01922678499253e-235
HAP1	7.21844391274837e-239	1.46448445033669	0.093	0.019	2.17058608456343e-234
CENPL	1.27948259765088e-238	2.21557579001036	0.111	0.029	3.8474041711362e-234
E2F3	1.58730743841684e-238	1.79555311250322	0.143	0.046	4.77303346731944e-234
CLDND1	1.7355422697139e-238	0.962998523922828	0.345	0.198	5.21877560502971e-234
NME4	2.0971019293035e-238	1.30365349785252	0.343	0.196	6.30598550141562e-234
AFF4	2.51297931494085e-238	0.704901325604475	0.449	0.277	7.55652880002713e-234
CTBP2	2.76015416622344e-238	1.27134283778032	0.439	0.276	8.29978357783388e-234
OAF	3.85247733039233e-238	0.839133553225819	0.233	0.105	1.15843993324897e-233
RNF223	7.10608135566041e-238	2.44454783828207	0.087	0.017	2.13679866364708e-233
HSPA4	7.13926926714205e-238	0.662120498891513	0.372	0.223	2.14677826862962e-233
MCFD2	8.4015505868695e-238	0.80974762130296	0.392	0.243	2.52634626147166e-233
ACTR3	1.01186366076756e-237	0.654036904668814	0.458	0.312	3.04267402792805e-233
INF2	1.58865549864419e-237	2.03809149752218	0.178	0.069	4.77708708442307e-233
PHGDH	2.63673490705662e-237	1.81267748266678	0.178	0.069	7.92866186551925e-233
PRSS22	4.50122259941053e-237	2.26551084262214	0.235	0.113	1.35351763564275e-232
KLC1	6.88850939551337e-237	1.30319004324798	0.292	0.152	2.07137477523087e-232
IWS1	1.07580235719974e-236	1.39558923076376	0.292	0.153	3.23493768809962e-232
EFCAB14	1.80105422665252e-236	2.3653487891699	0.332	0.194	5.41577005954411e-232
BX322562.1	2.59739254860191e-236	1.95020881812313	0.124	0.036	7.81035939364594e-232
ACBD6	3.08415952681903e-236	1.86705931070687	0.305	0.169	9.27406769714483e-232
ARFIP2	3.87705772724099e-236	1.54387986011913	0.302	0.165	1.16583125858136e-231
BNIP2	4.76872279644601e-236	1.27077256348509	0.308	0.167	1.43395494489132e-231
MALSU1	5.88193882501493e-236	1.67107623921217	0.359	0.211	1.76869900468199e-231
KLK11	6.104612675536e-236	3.23267359199156	0.26	0.134	1.83565703153368e-231
LIF	7.23589793091694e-236	1.20498918189968	0.134	0.041	2.17583450782672e-231
PCF11	1.32775364126081e-235	1.35138358443915	0.335	0.188	3.99255519927125e-231
RNF10	1.67986482395143e-235	1.59319044551766	0.361	0.214	5.05135352562194e-231
OSBP	2.38807572536506e-235	1.3548681312517	0.294	0.157	7.18094370617274e-231
MTA2	4.16577993041586e-235	2.87721468609256	0.143	0.048	1.25265002507605e-230
CAMSAP2	9.32189502557982e-235	1.83242506536478	0.243	0.117	2.80309383419185e-230
GAL	1.29830597225523e-234	1.31186778106864	0.187	0.073	3.90400605857149e-230
GGPS1	1.50713902253188e-234	2.12640191269392	0.286	0.154	4.53196704075335e-230
GRSF1	2.31439797020487e-234	1.19007971245014	0.324	0.183	6.95939469640604e-230
PSMD1	4.74467000727569e-234	1.12495664129189	0.342	0.199	1.4267222711878e-229
CA9	6.79714256503865e-234	4.73414990131905	0.064	0.008	2.04390076930712e-229
RABGGTB	7.68009902376387e-234	1.40979094917849	0.332	0.19	2.3094057764458e-229
SNU13	1.00376242843477e-233	0.619474581564768	0.585	0.415	3.01831362230335e-229
EMC10	2.17199675521813e-233	1.41887754561994	0.421	0.262	6.53119424294092e-229
EPB41L5	6.64832064405937e-233	2.69480913949537	0.218	0.1	1.99915001766865e-228
ARHGAP27	1.01372808263858e-232	2.79910593316921	0.112	0.03	3.0482803444942e-228
PDLIM5	1.21734791131929e-232	1.51817983366889	0.336	0.194	3.66056516933709e-228
HSPA13	1.32549587354601e-232	1.10983044287411	0.24	0.112	3.98576609175284e-228
FLVCR1	1.61293408235891e-232	3.19199983880226	0.14	0.047	4.85009278565323e-228
TES	1.81303588653349e-232	1.16582949440685	0.401	0.245	5.45179891080621e-228
KIAA1191	2.57512467336555e-232	2.14077156377538	0.291	0.157	7.74339989281021e-228
PSTPIP2	5.42447474730251e-232	2.12416343796602	0.137	0.044	1.63113955651387e-227
CAPN13	8.54579617330613e-232	3.81559728012572	0.083	0.016	2.56972090931315e-227
GPC1	1.16074999565837e-231	0.914037705670074	0.205	0.086	3.49037523694471e-227
GPD2	1.39569284916819e-231	2.07761350774742	0.208	0.091	4.19684839744875e-227
UBE2C	1.56003087743667e-231	3.83487624254246	0.061	0.007	4.69101284845206e-227
ZNF281	4.63353890165945e-231	0.986420052361117	0.267	0.132	1.393305147729e-226
TMEM39A	1.23810189762953e-230	1.99476397870236	0.225	0.104	3.722972406172e-226
PHAX	1.27021995673948e-230	1.28920284228478	0.308	0.172	3.81955140991561e-226
CDC73	1.29896981071336e-230	2.06111699756214	0.292	0.161	3.90600222081507e-226
LINC02551	1.39056100072192e-230	4.69153950645552	0.039	0.001	4.18141692917082e-226
RGS20	2.55274366535738e-230	2.39601391518096	0.064	0.008	7.67610020172964e-226
ISG20L2	2.66631126595324e-230	1.23424662499442	0.243	0.116	8.0175979767214e-226
ZNRF2	3.50706558132927e-230	3.08411095724975	0.25	0.127	1.05457462030571e-225
HNRNPL	3.51577010021412e-230	1.93611160647686	0.341	0.202	1.05719206913438e-225
RAB5A	4.60937100463559e-230	1.03727642714833	0.344	0.198	1.38603786109392e-225
DENND10	7.85219627146933e-230	3.77024392096036	0.072	0.012	2.36115541883083e-225
CREG1	1.00317036707795e-229	2.25214017536042	0.319	0.182	3.01653329380339e-225
PDLIM7	1.21163709499706e-229	1.61113336836042	0.232	0.104	3.64339274465617e-225
ZNF341-AS1	1.40514014084012e-229	4.41186016635168	0.038	0.001	4.22525640350624e-225
ODR4	1.65025638733456e-229	1.75605065553027	0.265	0.136	4.96232095671501e-225
KDSR	2.23350160303541e-229	1.52710653147403	0.322	0.183	6.71613932032748e-225
S100A11	2.449346193812e-229	0.607439288666894	0.772	0.647	7.36518400479267e-225
UCK2	2.56474209022134e-229	2.15215854274867	0.174	0.068	7.71217946529556e-225
SLTM	3.01620727478634e-229	1.12439351587098	0.424	0.269	9.06973527528254e-225
C6orf132	6.84463187534216e-229	1.94220855285661	0.24	0.117	2.05818080491539e-224
APOBEC3B	1.2343095955796e-228	4.8308176454368	0.045	0.002	3.71156895390786e-224
GMDS	1.68297238762417e-228	1.9737069351496	0.197	0.084	5.06069796958588e-224
PITRM1	1.84657144737712e-228	1.95633607262062	0.183	0.074	5.55264034226301e-224
BASP1	2.75395333168777e-228	0.477273051016036	0.498	0.304	8.28113766838513e-224
TRABD	3.97524612746772e-227	0.959725225723492	0.338	0.196	1.19535651052954e-222
CILP2	5.35087870529286e-227	3.08285940650379	0.055	0.005	1.60900922668156e-222
ZNF706	6.91184743291416e-227	0.523438850032521	0.446	0.303	2.07839252307729e-222
CST4	8.311739075544e-227	5.51327444346728	0.044	0.002	2.49933994001608e-222
DAPK3	1.78830017954165e-226	0.567681917647953	0.244	0.114	5.37741863988175e-222
PPP2R5A	1.83453557576664e-226	2.57880239047326	0.278	0.152	5.51644847633028e-222
GTF3C6	3.10393608100843e-226	1.17061621848517	0.469	0.298	9.33353579559235e-222
SVIL	3.73829233077487e-226	1.06676103642658	0.294	0.156	1.124104503864e-221
SUPV3L1	4.09255038423387e-226	1.95062540001542	0.186	0.077	1.23062990053913e-221
TRIM33	5.13053359510972e-226	1.28749907111433	0.33	0.189	1.54275145204949e-221
UBE2J2	1.03407513363214e-225	1.1211971823687	0.298	0.165	3.10946392683184e-221
LSM1	1.21834828114922e-225	1.49726124017825	0.351	0.209	3.66357328141571e-221
AK6	1.39964576397184e-225	0.872558115847446	0.324	0.187	4.20873481226332e-221
ILF3	1.50947903534354e-225	0.970160393799108	0.426	0.269	4.53900345927804e-221
NUCB2	1.99799148306449e-225	1.09313299090485	0.438	0.279	6.00796038957493e-221
AKIRIN1	2.57035534299373e-225	1.09903085281567	0.333	0.191	7.72905851638216e-221
PROSER2	7.62254437687738e-225	2.14156635717851	0.192	0.082	2.29209909412703e-220
VDAC2	1.29915326384307e-224	0.624088983319562	0.516	0.371	3.9065538643761e-220
WSB2	2.75900467024186e-224	1.59500201611701	0.274	0.144	8.29632704341727e-220
ELK4	8.65229439336909e-224	1.68476719846812	0.295	0.159	2.60174492408609e-219
DDAH1	1.14289561574383e-223	2.55385215531022	0.226	0.108	3.43668711654169e-219
GRPEL1	1.149705768391e-223	0.987849032477617	0.286	0.155	3.45716524555173e-219
PI4KB	2.3615037844347e-223	2.03278818988533	0.228	0.108	7.10104187979515e-219
AUP1	2.66515985085955e-223	0.799466881903092	0.399	0.25	8.01413567153466e-219
PLOD2	3.33574060228525e-223	2.32161823334733	0.255	0.13	1.00305719910717e-218
USP3	3.53817159749086e-223	1.82415760504308	0.308	0.172	1.0639281993655e-218
CDKN2B	6.41039964055175e-223	1.34600609621342	0.145	0.049	1.92760717191391e-218
TPMT	8.99851527740999e-223	1.5908674387306	0.248	0.124	2.70585354391719e-218
DCP1A	1.65257061147234e-222	0.831360711057517	0.264	0.133	4.96927982869732e-218
KCTD5	1.66071919814988e-222	1.76248780462339	0.149	0.052	4.99378262883668e-218
UGGT2	1.96711540046795e-222	2.33069863324916	0.229	0.11	5.91511600920711e-218
ASRGL1	3.6136015356313e-222	1.41851292068577	0.5	0.291	1.08660998176433e-217
RAD23B	4.30490778176677e-222	0.802366298747997	0.376	0.228	1.29448576997727e-217
DYRK1A	7.66101304985658e-222	1.4599189511391	0.286	0.152	2.30366662409187e-217
NUP54	1.45967947102017e-221	1.99294019922134	0.282	0.152	4.38925616935764e-217
CD44	1.57676059443145e-221	0.440355592922931	0.47	0.283	4.74131910745538e-217
CSRP1	1.62354514398424e-221	1.84227036537583	0.408	0.266	4.88200024796061e-217
GCH1	1.78179048042208e-221	0.540689311859453	0.122	0.036	5.3578439746292e-217
PCP4	2.26928313286057e-221	2.54807167985723	0.06	0.008	6.82373438051173e-217
RNF169	5.05587765376419e-221	1.79110735399233	0.233	0.111	1.52030241048689e-216
PSMC2	5.10278969519808e-221	1.23133318811068	0.324	0.188	1.53440886134606e-216
OSGIN2	1.0278259132125e-220	2.18950942426704	0.188	0.08	3.09067252102997e-216
SPECC1	1.17371117777884e-220	2.2950718849665	0.295	0.162	3.52934951158096e-216
SEC16B	1.24776795876135e-220	4.78602797682491	0.087	0.019	3.75203825199539e-216
RAB5IF	1.48982308628676e-220	0.829869102471068	0.358	0.221	4.47989802046429e-216
IRF6	1.92061731830512e-220	1.77203383797886	0.254	0.129	5.7752962761435e-216
CNN3	2.77274564525005e-220	0.634796848983759	0.468	0.31	8.33764615526689e-216
CTNND1	3.6833015700225e-220	1.65653350643208	0.403	0.257	1.10756878210577e-215
DNAJC3	5.0275389124129e-220	0.827479760065032	0.442	0.284	1.51178095096256e-215
STK39	7.14953685908334e-220	2.69083239192491	0.143	0.05	2.14986573352636e-215
PARD3	1.17680247737558e-219	1.85628135251765	0.237	0.116	3.53864504946836e-215
RMND5A	1.32553701013888e-219	2.28099534800826	0.232	0.113	3.98588978948763e-215
AC139887.4	1.78821864966868e-219	2.56886751321868	0.059	0.007	5.37717347955372e-215
FAM20B	9.17658661754878e-219	2.65649197803966	0.192	0.083	2.75939959589692e-214
S100A14	9.39213789054797e-219	2.20926198057797	0.273	0.151	2.82421586368777e-214
HECTD1	1.61577361525392e-218	0.972642455993952	0.392	0.245	4.85863126106853e-214
SRSF12	2.31325607980372e-218	1.38087651030611	0.076	0.014	6.95596103196977e-214
DES	6.73060734332895e-218	3.25394466943607	0.078	0.015	2.02389362813901e-213
C15orf48	7.70581307251038e-218	2.14534882114091	0.145	0.051	2.31713799090387e-213
PNPLA2	1.16863356600242e-217	1.19017211879759	0.332	0.195	3.51408113296928e-213
CST1	1.21193578467969e-217	4.16848695177249	0.059	0.007	3.64429090453182e-213
AC021218.1	1.39598246872766e-217	4.1771951534417	0.043	0.002	4.19771928346407e-213
APLP2	2.61879040234907e-217	0.964710754443997	0.573	0.373	7.87470273986367e-213
PWP1	4.66252998335436e-217	1.14147503643741	0.31	0.177	1.40202276599466e-212
DGUOK	6.94729259842683e-217	0.818449986214037	0.417	0.265	2.08905088434695e-212
PTPRK	1.3004131609072e-216	2.16957025411708	0.278	0.15	3.91034237484795e-212
IPO9	1.44757668666725e-216	1.95161708175577	0.22	0.104	4.35286309680841e-212
NIPA2	6.36167409323624e-216	1.48080841217551	0.268	0.143	1.91295539983614e-211
TM9SF2	7.27171840419309e-216	1.68538464626876	0.426	0.274	2.18660572414086e-211
SNX27	7.33314452100727e-216	1.9981045905905	0.243	0.121	2.20507655746689e-211
CD79A	1.44471136196242e-215	3.93512937424178	0.043	0.002	4.34424706542099e-211
OPTN	1.70660691244881e-215	1.41408276391642	0.32	0.181	5.13176698573359e-211
VCP	2.457304404065e-215	0.575736335130475	0.439	0.299	7.38911434302345e-211
ERP44	3.69311794198838e-215	0.959297365376021	0.443	0.286	1.1105205651559e-210
SLC9A2	3.75969864060994e-215	5.68453	0.063	0.009	1.13054138123141e-210
ZNF410	5.95856268849675e-215	3.17042670400417	0.105	0.029	1.79173980043097e-210
TLR2	6.34814781644961e-215	3.86796678546263	0.065	0.01	1.9088880484064e-210
PLEKHB2	1.52359837067339e-214	0.816733312990478	0.343	0.204	4.5814603006149e-210
ENO2	1.82427487070323e-214	3.52525435376751	0.107	0.03	5.48559453620462e-210
CRK	1.96638933716227e-214	0.817392400557977	0.321	0.185	5.91293273684696e-210
LBR	2.04936965160015e-214	1.53034559479565	0.297	0.164	6.16245454236165e-210
MED10	3.62056829829723e-214	0.523703977093417	0.372	0.234	1.08870488729798e-209
LONRF3	4.37735458599587e-214	1.88778477924375	0.079	0.016	1.31627052400896e-209
SMAGP	2.0466178170236e-213	1.65723946417058	0.136	0.046	6.15417977578997e-209
NIBAN1	2.24274790396457e-213	4.41504365514878	0.041	0.002	6.74394294722146e-209
UQCRHL	2.54916464059483e-213	3.00661808052388	0.056	0.007	7.66533807426864e-209
SLC39A7	2.82645139343701e-213	1.26431204891596	0.359	0.216	8.4991393400651e-209
PTPRJ	3.16291749216756e-213	2.61881756911346	0.156	0.059	9.51089289894786e-209
ECPAS	6.66272428915387e-213	2.14935260367487	0.272	0.147	2.00348119374857e-208
CLGN	7.45214422608027e-213	1.88905587467881	0.103	0.027	2.24085976878234e-208
MYO10	1.15197151898449e-212	1.61457128448874	0.276	0.148	3.46397835758638e-208
VPS72	1.89493859469017e-212	1.72167793087471	0.277	0.151	5.69808035423336e-208
ALS2CL	4.07425606169167e-212	2.47896649002286	0.084	0.018	1.22512879775069e-207
PYURF	5.43574883409712e-212	1.30333166472249	0.441	0.285	1.634529674413e-207
OBSCN	6.46321360894241e-212	3.36500145623325	0.131	0.044	1.94348833220898e-207
CGN	8.00243677248719e-212	2.76587760210178	0.164	0.065	2.4063327374869e-207
SLC16A1	1.20498427999782e-211	2.1392921453045	0.195	0.085	3.62338772995346e-207
ARL6IP5	1.2725084066146e-211	1.08872701987951	0.468	0.306	3.82643277869011e-207
CSNK1G2	2.03062457591799e-211	1.5382015214046	0.292	0.162	6.10608809978539e-207
SEC61A1	2.14086624176403e-211	0.746687611734072	0.437	0.275	6.43758478898444e-207
RRAS2	2.14236070416189e-211	1.53579277168582	0.252	0.129	6.4420786374148e-207
FOPNL	4.36328008811198e-211	2.04983555362129	0.22	0.105	1.31203832249527e-206
USP34	7.31919148429776e-211	1.66536618529467	0.362	0.223	2.20088087932834e-206
GOLGA3	8.60505660378806e-211	1.0408860913465	0.279	0.148	2.58754052075907e-206
SELENOW	9.45360817111499e-211	1.01371702732007	0.565	0.394	2.84269997705428e-206
TMEM184B	1.11678716850099e-210	2.47291752261486	0.245	0.126	3.35817901568247e-206
POLR2H	1.19488847774638e-210	1.24174160376442	0.415	0.266	3.59302965258335e-206
YAP1	2.08784912208423e-210	1.74293008991225	0.368	0.228	6.27816231010729e-206
CTNNAL1	2.09737617519523e-210	0.767442817714506	0.387	0.24	6.30681015881205e-206
DEDD	5.18476919342715e-210	3.16309383800193	0.164	0.066	1.55906009646354e-205
ATAD1	5.38537142823166e-210	1.99792055131396	0.302	0.173	1.61938118846926e-205
PSMB4	8.16876812739117e-210	0.38300006281896	0.479	0.324	2.45634857590652e-205
CSNK1D	1.00917405060131e-209	0.952812085515026	0.357	0.214	3.03458637015812e-205
TMED7	1.27659725409205e-209	1.82722540373863	0.383	0.245	3.8387279430548e-205
GNPAT	2.83682924508665e-209	2.28924464794308	0.265	0.143	8.53034553997557e-205
P4HA1	2.88700727143224e-209	2.14063416044536	0.314	0.185	8.68123086519674e-205
RRS1	2.89979465208677e-209	1.63343551394469	0.187	0.081	8.71968251882493e-205
RBM3	3.60132832864565e-209	0.658311978282197	0.562	0.395	1.08291942842375e-204
KMT2E	4.00751854612651e-209	1.10903299793542	0.453	0.299	1.20506082682024e-204
TMCO3	7.16329547244036e-209	1.90842764595566	0.296	0.168	2.15400294856282e-204
CCDC73	1.06462851808211e-208	6.54525524984354	0.042	0.002	3.20133795387289e-204
YY1AP1	1.72556201228401e-208	1.8795140040488	0.232	0.114	5.18876497093802e-204
SEPHS2	1.95466696319463e-208	1.35402053713431	0.335	0.201	5.87768355832625e-204
SUN1	2.05078565920665e-208	0.923788780574329	0.355	0.212	6.16671247723438e-204
PPIG	2.20933072022586e-208	0.631634819420087	0.466	0.307	6.64345747571917e-204
C9orf16	2.25298183678783e-208	0.688365604250724	0.512	0.342	6.77471638322099e-204
DYNLL2	2.44806119245228e-208	1.82939206758378	0.28	0.155	7.36132000570399e-204
MRPS30	3.34243735147725e-208	0.632195752699048	0.268	0.144	1.00507091158921e-203
ALDH2	5.80420269815112e-208	1.19475964719015	0.377	0.231	1.74532375133404e-203
RHOD	7.90586794569448e-208	1.35165192569252	0.198	0.089	2.37729449127033e-203
RAB13	8.61652010710459e-208	0.648679369492931	0.564	0.387	2.59098759620635e-203
TRMT10C	1.39719891060924e-207	1.17113232514575	0.332	0.203	4.20137712420197e-203
TOMM22	2.6259966623057e-207	0.895776434410868	0.409	0.264	7.89637196355323e-203
USP36	3.18087452015083e-207	0.88478035471577	0.204	0.091	9.56488968209354e-203
KDM2A	5.20778627183231e-207	1.35805329784722	0.319	0.184	1.56598133193998e-202
MAP7D1	6.08376482013553e-207	0.523212459790439	0.266	0.137	1.82938808141475e-202
SELENOI	6.76862170696236e-207	2.24551703566021	0.167	0.067	2.03532454728358e-202
LTV1	2.81884935449852e-206	1.2167242141666	0.239	0.121	8.47628000897705e-202
NECTIN2	2.8682209371226e-206	0.65753633206124	0.429	0.289	8.62474035792766e-202
CA8	3.13151908604571e-206	2.35764917893269	0.231	0.116	9.41647789173945e-202
PSMC4	5.43243751460573e-206	0.497814061018142	0.413	0.269	1.63353396064194e-201
PTTG1IP	5.87305041821237e-206	0.752902323294086	0.521	0.348	1.76602626075646e-201
EIF3B	6.50328580208686e-206	0.864752102460247	0.364	0.227	1.95553804068752e-201
NLK	8.4714165195948e-206	3.64864728546943	0.143	0.054	2.54735494744216e-201
TPRA1	9.4320511841035e-206	1.37447850401102	0.228	0.113	2.83621779105992e-201
SMG5	1.04352672533518e-205	2.82158336092628	0.159	0.063	3.1378848630829e-201
ZBTB43	1.59293606837621e-205	0.28520752420926	0.256	0.128	4.78995875760725e-201
ETF1	2.48927473811335e-205	0.368232338372221	0.376	0.231	7.48524913750684e-201
PPP1R8	3.41614778513773e-205	2.87848046854381	0.201	0.094	1.02723563899092e-200
ITGA6	5.57958740306333e-205	1.14024562875474	0.324	0.184	1.67778193210114e-200
CAMSAP1	6.13047588319334e-205	1.72987661732784	0.162	0.064	1.84343409807624e-200
HMGA2	6.51739106909976e-205	3.03667659028397	0.139	0.049	1.9597794944783e-200
LUC7L3	6.56778859948465e-205	1.17629782022794	0.534	0.362	1.97493403186504e-200
ITPKA	1.08195439576758e-204	2.4877380846867	0.04	0.002	3.25343686807311e-200
ADM2	1.43076973424692e-204	3.8538602618774	0.049	0.005	4.3023245908805e-200
SH3BP4	2.05938020721787e-204	1.70635206655581	0.2	0.09	6.19255628310414e-200
TXNDC11	2.09706338711607e-204	2.05179366823303	0.211	0.1	6.30586960505801e-200
PICALM	5.94139654632796e-204	1.64932158561552	0.276	0.151	1.78657794148082e-199
DENND2C	9.27707810652104e-204	1.3574558296249	0.102	0.028	2.78961738663088e-199
ZNF121	9.648332064679e-204	1.81862023806248	0.207	0.096	2.90125345184897e-199
TMEM189	1.03887479278316e-203	1.68115188787046	0.208	0.097	3.12389650189896e-199
ERLEC1	1.99410506815857e-203	1.84597986378639	0.383	0.248	5.99627393995282e-199
SLC31A1	2.47674478764543e-203	2.32420127964218	0.195	0.088	7.44757157644981e-199
SLC39A1	3.00889133212502e-203	0.788278189248284	0.386	0.247	9.04773623569992e-199
GGCT	5.46654273024815e-203	1.56518656862982	0.341	0.206	1.64378939898562e-198
MRS2	6.61837561658905e-203	2.53736446311905	0.208	0.098	1.99014554790833e-198
RAMMET	1.10443767015702e-202	0.867575281377859	0.315	0.187	3.32104407416215e-198
TMEM167B	1.49784095044874e-202	1.3443896370884	0.253	0.131	4.50400773799936e-198
GATAD2B	1.93546983275741e-202	2.06622165884129	0.232	0.116	5.81995778710153e-198
UBE2D3	3.06091148858587e-202	0.393428638660075	0.612	0.449	9.2041608461777e-198
RWDD4	4.94221555752037e-202	1.90457769822053	0.26	0.139	1.48612421814638e-197
MAFK	6.37505691592195e-202	1.01921206356297	0.22	0.103	1.91697961461773e-197
LRP4	6.47829105384994e-202	5.00227198610648	0.047	0.004	1.94802211989268e-197
TMEM248	6.66611097655861e-202	1.54067569874472	0.356	0.22	2.00449957065117e-197
ATAD3B	1.01354152096706e-201	1.33044699271702	0.146	0.053	3.04771935354795e-197
LENG8	1.36783381481659e-201	2.36233649030442	0.338	0.209	4.11307628115347e-197
PRKACA	1.5207485274958e-201	3.26247656531263	0.2	0.096	4.57289082217988e-197
CBX3	2.77994493735871e-201	0.922885086779123	0.509	0.338	8.35929442663764e-197
GALNT9	3.45344752198579e-201	3.45527589243818	0.051	0.006	1.03845166986113e-196
LYN	5.53418855772607e-201	0.801267265902987	0.189	0.082	1.66413049930823e-196
THOC7	7.40795513611602e-201	1.18143303662572	0.442	0.283	2.22757210943009e-196
MSANTD3	8.67344568656255e-201	0.864426773953946	0.236	0.117	2.60810511794936e-196
DDIT3	9.06674968169979e-201	0.763699444168723	0.278	0.149	2.72637162928713e-196
MSL1	1.04487062630061e-200	1.86038096037352	0.281	0.157	3.14192597328594e-196
CUL4A	1.07269820562906e-200	1.45660704414881	0.261	0.138	3.2256035043266e-196
MTSS2	1.69056622330458e-200	4.86244719846723	0.04	0.002	5.08353263347689e-196
PGAM1	1.74857088814695e-200	0.779097713590618	0.455	0.298	5.25795266065788e-196
RTCB	2.00912805047576e-200	1.02313829258869	0.357	0.228	6.04144804778061e-196
NAA15	2.12392231039416e-200	1.36130449114379	0.283	0.157	6.38663438735523e-196
RNF11	2.33439315333109e-200	1.41949263544268	0.29	0.162	7.01952021206658e-196
GLO1	2.70608369910574e-200	0.730028627904592	0.402	0.257	8.13719368321095e-196
SPG7	2.85798834016999e-200	1.59865418449582	0.331	0.202	8.59397093889115e-196
IER3IP1	3.05078118768189e-200	1.10636029248126	0.424	0.277	9.17369903135944e-196
SRFBP1	3.28664004089986e-200	1.46138300701829	0.283	0.159	9.88292660298587e-196
PPP6C	6.55140987529131e-200	1.84136219472671	0.266	0.144	1.9700089495001e-195
STAU2	9.01433412596383e-200	3.32233245165613	0.221	0.114	2.71061027167732e-195
SLC3A2	1.1744118110807e-199	0.541166662190356	0.508	0.361	3.53145631591968e-195
KDM5C	1.50603046145351e-199	2.23351257496604	0.256	0.136	4.5286335975907e-195
GOLT1B	1.52285046576547e-199	1.25902935203692	0.254	0.133	4.57921135055678e-195
BCL2L13	1.58151049904607e-199	2.53615490910225	0.208	0.1	4.75560207063155e-195
AQP3	2.22077438507325e-199	2.20311538101371	0.243	0.129	6.67786857591525e-195
CX3CL1	2.41780014375236e-199	2.62579032403802	0.14	0.052	7.27032503226334e-195
RBM17	3.41368498136112e-199	0.76768235264416	0.408	0.266	1.02649507389529e-194
SDC1	3.44129255355927e-199	2.26372370912084	0.148	0.057	1.03479667085527e-194
RABGAP1L	3.62069092495451e-199	2.75807565077681	0.217	0.11	1.08874176113382e-194
NME1	4.9427042541223e-199	0.669116724073079	0.415	0.269	1.48627116921457e-194
CRACR2B	9.44065508039165e-199	3.00767738923547	0.137	0.05	2.83880498267377e-194
PPP2R5B	1.53523946705676e-198	1.82143962506573	0.105	0.03	4.61646507743968e-194
EIF4E2	2.31294115044285e-198	1.05752934874636	0.392	0.251	6.95501403938166e-194
MAL	2.64275443964313e-198	5.0557681911005	0.08	0.018	7.94676260000688e-194
DLG1	2.81670145872087e-198	2.2688788542119	0.292	0.17	8.46982128637365e-194
IRAK1	4.85491605459417e-198	1.3553267140861	0.24	0.124	1.45987325761647e-193
FNDC3A	4.98092084840723e-198	1.31261705384414	0.372	0.237	1.49776289911605e-193
SERTAD2	5.31932635648372e-198	1.39425678384223	0.198	0.09	1.59952143539466e-193
ISG15	5.84166393899742e-198	1.04190871098931	0.344	0.21	1.75658834645652e-193
FXR2	6.31734552719005e-198	1.88285408453177	0.154	0.06	1.89962580002605e-193
DNHD1	6.94556980503925e-198	3.13706316031001	0.065	0.011	2.0885328403753e-193
LGALS8	7.31441092679503e-198	1.75516197215629	0.216	0.105	2.19944336568727e-193
AP4B1	9.31892140688763e-198	2.3521	0.122	0.04	2.80219966705111e-193
C1orf74	1.12690127591565e-197	3.21649700464103	0.076	0.016	3.38859213667835e-193
MDFI	1.41977107458806e-197	1.95376326931493	0.075	0.015	4.2692516212863e-193
MAPKAPK5	1.46852775202598e-197	1.77560781771701	0.23	0.116	4.41586295034212e-193
FLAD1	2.48120869912606e-197	1.96696568573454	0.221	0.11	7.46099455827205e-193
TMOD1	9.72948567820874e-197	1.43007435821911	0.218	0.108	2.92565634343737e-192
CRB3	1.0784015975246e-196	1.57182474464091	0.286	0.163	3.24275360375647e-192
COPS3	1.54490692518786e-196	0.976694392508848	0.304	0.177	4.64553512403989e-192
IL1B	1.55930528578844e-196	1.05441140048375	0.113	0.033	4.68883099436585e-192
STX16	1.71798099944815e-196	1.77066865458275	0.261	0.14	5.1659688653406e-192
ZNF587B	3.78452861967715e-196	4.29337516360026	0.105	0.032	1.13800775593692e-191
CAPN14	6.61247068630295e-196	6.34676303666598	0.033	0.001	1.9883699353713e-191
GCLC	8.08428292309083e-196	1.95278942837208	0.231	0.117	2.43094387497341e-191
CGA	8.70940788488604e-196	3.92514592086821	0.033	0.001	2.61891895098523e-191
CHPF	8.84771424971667e-196	1.48403589439189	0.318	0.188	2.6605076748898e-191
ADNP2	1.27681619633063e-195	1.58388316245564	0.175	0.074	3.83938630236619e-191
ZNF639	1.81502091254185e-195	2.43183798316241	0.205	0.098	5.45776788401334e-191
PSMD14	4.06385675826305e-195	0.59931084207251	0.346	0.216	1.2220017272097e-190
SBNO2	6.17584898935601e-195	1.36322278794055	0.217	0.104	1.85707779109935e-190
EIF5	6.7209248948544e-195	0.471392865691684	0.561	0.4	2.02098211588272e-190
PODXL	1.2326211483626e-194	1.42811595611462	0.337	0.205	3.70649179312634e-190
CCT4	1.46171161155838e-194	0.437231660299049	0.479	0.332	4.39536681595604e-190
CLK3	1.49105694255651e-194	1.09174915392315	0.249	0.13	4.48360822626743e-190
FICD	4.25263486806778e-194	2.0426545020934	0.145	0.055	1.27876730482798e-189
MALT1	8.04412551693329e-194	1.97406019032175	0.203	0.096	2.41886854294184e-189
KRT7	1.1229117107308e-193	0.851965841332038	0.383	0.224	3.3765955141675e-189
JOSD1	1.73805278110889e-193	1.23024547091033	0.281	0.156	5.22632471279443e-189
METTL5	2.48892037509078e-193	1.15736100922489	0.363	0.228	7.48418356789798e-189
ERGIC1	4.24635125122143e-193	1.05896031701164	0.368	0.23	1.27687782124228e-188
FBLN1	5.54001601811174e-193	1.02406052025476	0.691	0.538	1.6658828166462e-188
SLC12A2	6.45486196759152e-193	1.19428619013115	0.243	0.124	1.94097699365477e-188
DENND1B	1.61480273141846e-192	2.62218108437846	0.168	0.072	4.85571181337531e-188
PGP	1.73909641517621e-192	1.54988943533199	0.253	0.136	5.22946292043488e-188
MAP4K5	1.76801160839384e-192	1.42908638826801	0.279	0.156	5.31641090644029e-188
CCNK	1.96492478577136e-192	1.45054828672463	0.246	0.127	5.90852883081449e-188
PGD	2.20825059397813e-192	1.57894161202773	0.247	0.131	6.64020953609224e-188
SCNM1	3.44422894851096e-192	1.72403045789768	0.222	0.111	1.03567964481725e-187
ANKRD10	4.73525574592436e-192	1.29434682395492	0.391	0.252	1.42389140279945e-187
GPR35	5.70550688323587e-192	3.44615094540829	0.054	0.007	1.71564591978902e-187
PPP4R2	7.36567979799745e-192	0.69543683741158	0.381	0.245	2.21485991525783e-187
LAMC1	8.01628390921019e-192	1.2626164728033	0.355	0.215	2.41049657149951e-187
DENND11	8.3047854186918e-192	3.62365486202818	0.061	0.01	2.49724897540063e-187
CMAS	1.30558226277859e-191	1.86130234735214	0.246	0.131	3.92588586417521e-187
ATF4	2.20848547307818e-191	0.345781842015773	0.531	0.377	6.64091581754609e-187
EPHA1-AS1	5.06868498826974e-191	1.1957463371836	0.072	0.015	1.52415357597271e-186
TENT5B	5.19548628536912e-191	1.30555637240706	0.058	0.009	1.5622827260105e-186
CHRDL2	5.99166355777525e-191	6.0238570313143	0.039	0.002	1.80169323182302e-186
SH2D4A	6.77917503715205e-191	1.72605142056781	0.249	0.133	2.03849793367162e-186
RFX5	6.91390485055896e-191	3.01524106831381	0.138	0.052	2.07901118856308e-186
SNHG15	7.9252891221861e-191	0.105502130740597	0.287	0.16	2.38313443904136e-186
SBF2	8.05767329584348e-191	1.01422536226855	0.259	0.138	2.42294236006013e-186
AC127521.1	2.00303784998779e-190	3.98940816294314	0.05	0.006	6.02313481491327e-186
EEF1AKNMT	3.13836139317862e-190	3.96934409686589	0.051	0.006	9.43705270928812e-186
NEK7	6.38361862907469e-190	2.71192598058059	0.196	0.094	1.91955412176276e-185
GRB10	6.74769809820193e-190	1.63434340924202	0.125	0.043	2.02903281812932e-185
UBE3A	7.35421757335484e-190	0.940174279580243	0.367	0.231	2.2114132243078e-185
ZDHHC20	7.68064901372616e-190	2.4556288260595	0.221	0.114	2.30957115842746e-185
TSTD1	7.84634458335439e-190	0.806030673769747	0.456	0.277	2.35939581621467e-185
MYO1E	8.16637021035242e-190	1.03308974733286	0.219	0.107	2.45562752225297e-185
G0S2	1.0513070082206e-189	1.31749710530437	0.214	0.1	3.16128017371933e-185
RAE1	1.17003173731441e-189	1.26158621757838	0.22	0.11	3.51828543410443e-185
MICAL2	2.18153196268446e-189	1.82914086965005	0.099	0.028	6.55986661179217e-185
AAGAB	2.19353410036537e-189	2.46292750640003	0.175	0.077	6.59595703979868e-185
AL133163.2	2.86763639783469e-189	5.42121819120745	0.031	0	8.62298264828891e-185
ARID3B	3.35154711039066e-189	2.11501910160977	0.099	0.028	1.00781021609447e-184
PAWR	3.68694688122029e-189	0.644223497195771	0.421	0.276	1.10866492718294e-184
RSAD2	4.44632136822105e-189	2.97213997122445	0.066	0.012	1.33700883542407e-184
MIA2	4.4521122494975e-189	2.15798329793655	0.349	0.218	1.3387501534239e-184
PLXNA2	5.821744431721e-189	2.74992424762395	0.11	0.034	1.7505985506185e-184
GAK	6.49572659213594e-189	1.36493638810137	0.247	0.129	1.95326498625528e-184
ATP6V1B2	1.37692956575596e-188	1.39300077314162	0.253	0.135	4.14042720422818e-184
TMEM106C	2.63543804800205e-188	2.76775976991743	0.266	0.154	7.92476221034216e-184
ASXL1	2.88825052692033e-188	1.98760256532192	0.288	0.167	8.68496933444944e-184
HIST1H1E	3.00621601023991e-188	2.10234905468055	0.12	0.04	9.03969154279141e-184
GNPNAT1	3.02623510829641e-188	1.42976	0.242	0.127	9.09988897064731e-184
SERPINA1	3.05702322626776e-188	1.61168556591693	0.312	0.193	9.19246884138715e-184
WDR1	7.44137286678689e-188	0.326792886345294	0.385	0.252	2.23762082104282e-183
PCGF5	7.79752950023427e-188	1.40518730330949	0.28	0.159	2.34471712072044e-183
NOLC1	1.0199484218319e-187	0.401629461837809	0.286	0.162	3.06698490444853e-183
XPOT	1.96334477847993e-187	2.01169245770018	0.205	0.1	5.90377774888914e-183
LYAR	2.21085843488754e-187	1.10381147105918	0.191	0.089	6.64805131370684e-183
MPZL2	2.28267570851337e-187	1.19226550815335	0.374	0.226	6.86400585549971e-183
HAX1	3.92102677248264e-187	0.854592074194015	0.368	0.236	1.17905275048553e-182
WBP2	4.6405480185273e-187	0.921291134994137	0.302	0.179	1.39541278917116e-182
GET1	4.99962616403843e-187	3.26520681524368	0.071	0.015	1.50338758752636e-182
FAM32A	5.97707639412557e-187	1.09912894038993	0.346	0.215	1.79730687171356e-182
VPS53	1.20989098851352e-186	1.99532500103467	0.21	0.103	3.63814220246017e-182
BLZF1	1.22458615473916e-186	1.64728876759643	0.209	0.103	3.68233056730065e-182
RAD54L2	2.3950875979462e-186	1.71020543999669	0.16	0.065	7.20202840702423e-182
AC074387.1	2.59655044089944e-186	4.42675096387932	0.032	0.001	7.80782717578462e-182
ALAS1	4.67557302536418e-186	1.99198779521789	0.197	0.094	1.40594480872701e-181
ACSL1	1.49657692558789e-185	1.85485585831431	0.148	0.059	4.50020681524278e-181
SH3GLB1	1.56364852830242e-185	0.849367229274018	0.408	0.269	4.70189112460538e-181
RTCA	1.99596749748935e-185	1.70726670967295	0.246	0.132	6.00187426495049e-181
FAM193B	3.24419222547747e-185	3.04695303393359	0.144	0.057	9.75528602201075e-181
GALNT1	1.10285447341496e-184	1.62802470649209	0.353	0.223	3.3162834015588e-180
FLII	1.89742182145523e-184	1.31826889470038	0.306	0.182	5.70554741711587e-180
FAF2	2.0494419654507e-184	1.1932230033157	0.271	0.153	6.16267199011027e-180
MAPRE1	2.41897026606328e-184	0.374516348811955	0.359	0.222	7.27384359005227e-180
RELA	2.71045007704887e-184	0.987890873852596	0.315	0.189	8.15032338168596e-180
MGAT4B	3.60673900282462e-184	1.22630997352271	0.345	0.212	1.08454641814936e-179
CCNG1	3.99045215524038e-184	1.45598977886669	0.352	0.219	1.19992896308078e-179
CCDC88C	4.57335528353857e-184	2.33407765765981	0.152	0.061	1.37520793376005e-179
WWC1	4.94859261573496e-184	2.31343085422658	0.218	0.11	1.4880417995515e-179
MAP2K4	8.32749403061062e-184	2.28651639067466	0.186	0.086	2.50407745500461e-179
ECT2	9.90409212906104e-184	3.31949331031841	0.136	0.051	2.97816050320865e-179
ZNF326	1.6351195846373e-183	0.812563435954633	0.328	0.199	4.91680459100437e-179
MPHOSPH10	1.87829903173538e-183	1.18888380945166	0.312	0.188	5.64804518842827e-179
DNAJB9	2.65392736989383e-183	1.15923359080323	0.344	0.213	7.98035960127073e-179
CCDC85C	3.70147609015031e-183	2.21025820814986	0.125	0.044	1.1130338603082e-178
FIP1L1	3.95679612995203e-183	1.19597473939598	0.299	0.175	1.18980859627657e-178
ARL1	4.71329645914396e-183	0.598143672490389	0.437	0.294	1.41728824526459e-178
CTSV	5.29789734975973e-183	1.75122468975471	0.177	0.078	1.59307773307275e-178
ARFGEF3	5.94457483016033e-183	2.19215373450177	0.159	0.066	1.78753365142921e-178
DIAPH1	6.31504781143969e-183	1.23995135068581	0.306	0.183	1.89893487689991e-178
UBAP2L	8.39933688194216e-183	2.08830037779179	0.266	0.151	2.52568060040001e-178
HID1	9.89714183842315e-183	2.49807150611102	0.173	0.077	2.97607055081384e-178
CCDC59	1.21229913643579e-182	0.431705123987203	0.381	0.246	3.64538350326243e-178
CARD10	2.36258974735225e-182	1.66207618520161	0.134	0.05	7.10430737028821e-178
KIFC3	3.40781546518316e-182	1.29635096732252	0.141	0.054	1.02473011038058e-177
PON2	4.06686667613758e-182	1.65874210632392	0.365	0.232	1.22290680951457e-177
SLBP	9.60725876316118e-182	1.38225337223258	0.307	0.185	2.88890271008257e-177
FSTL3	1.6996036543071e-181	0.789991321590582	0.184	0.081	5.11070818850144e-177
GJB3	2.63253011592255e-181	2.49664058775262	0.089	0.024	7.9160180585791e-177
KCTD9	2.6738718292741e-181	2.62602002267713	0.144	0.057	8.0403325906272e-177
TMEM185A	2.69559135892139e-181	2.82062263862833	0.151	0.062	8.10564321627662e-177
ENO1	7.75405767968737e-181	0.68282553117927	0.552	0.414	2.33164514428199e-176
CES3	1.0487194513296e-180	5.13753039593619	0.05	0.007	3.15349939014811e-176
ANXA7	1.63304694527638e-180	0.828730340142846	0.388	0.255	4.91057216444607e-176
PLIN3	1.76696642380535e-180	0.652993126357401	0.324	0.199	5.31326803638268e-176
LIN7C	3.3947417755063e-180	2.06228264597683	0.25	0.138	1.02079885189474e-175
OSTF1	3.5434959006736e-180	1.41537288312047	0.308	0.188	1.06552921733255e-175
PLA2G4A	4.3048306251593e-180	2.1111002421414	0.196	0.095	1.2944625689854e-175
FBXW7	5.26636098209594e-180	1.87729202495355	0.239	0.127	1.58359474731625e-175
PAQR6	5.87301868672496e-180	3.91730775835636	0.057	0.009	1.76601671909819e-175
EPB41L4B	7.69905351932987e-180	4.1267173092976	0.109	0.036	2.31510539326249e-175
RAB3GAP1	8.47500275412593e-180	2.31703692193415	0.258	0.146	2.54843332816567e-175
DOCK5	8.67877556679033e-180	2.60932380816907	0.2	0.097	2.60970781293385e-175
LINC00607	9.57011452242187e-180	5.01090338687331	0.03	0.001	2.87773343689226e-175
RRP36	1.38175596985794e-179	1.51745645824124	0.249	0.136	4.15494020136282e-175
LRFN4	2.00757716338174e-179	0.83827118309412	0.169	0.073	6.0367845302889e-175
PRDX4	2.68155145948453e-179	0.55785674847054	0.481	0.332	8.06342523866999e-175
SIN3B	3.39532053637756e-179	1.57011518524829	0.21	0.103	1.02097288528873e-174
DYNLT3	3.40381094348138e-179	0.471326418388042	0.388	0.255	1.02352595070485e-174
TSNAX	4.33255106563327e-179	1.86806315925354	0.267	0.156	1.30279810543592e-174
XPNPEP1	8.00045843574389e-179	1.23107264289904	0.217	0.109	2.40573785162819e-174
WASL	9.61220471005132e-179	1.01352481351023	0.337	0.209	2.89038995631243e-174
IFT57	1.08765131876709e-178	0.801724208481686	0.389	0.252	3.27056751553265e-174
CARS	1.20012060933371e-178	0.827151318333302	0.214	0.107	3.60876267226645e-174
SRD5A3	1.29974248668466e-178	2.13041282879291	0.332	0.211	3.90832565746076e-174
PBX4	1.38672153229199e-178	2.18395127386352	0.059	0.01	4.16987164760201e-174
DUS1L	1.5718342448402e-178	1.35652697546263	0.328	0.204	4.72650557423447e-174
GPT2	1.69961291271449e-178	2.37682931203054	0.149	0.061	5.11073602853248e-174
LINC02177	2.58212644668089e-178	7.75859638025537	0.029	0	7.76445422516944e-174
DERL2	3.16037793402892e-178	0.839304216087066	0.365	0.234	9.50325644762497e-174
C11orf24	4.15643141417842e-178	1.91699021784423	0.151	0.062	1.24983892624345e-173
MTLN	1.83418867075255e-177	4.23696939761817	0.095	0.029	5.51540533295291e-173
FMNL2	2.71253033988293e-177	2.80602357148013	0.188	0.09	8.15657873202797e-173
PSMD13	5.92714988020873e-177	0.68087824892187	0.386	0.254	1.78229396897876e-172
UBE2E1	8.03474428018687e-177	1.00316501334899	0.308	0.186	2.41604760505219e-172
LINC00511	1.42254353613082e-176	1.17516687620768	0.121	0.042	4.27758841314539e-172
PHC2	1.44933909498645e-176	0.683472561762736	0.323	0.197	4.35816265862425e-172
LEF1	1.48182266906692e-176	2.44332160633919	0.126	0.046	4.45584076588422e-172
SRGAP1	2.9312284241188e-176	1.49045678050811	0.188	0.089	8.81420387132522e-172
ADPGK	4.20112047669912e-176	2.17794644075481	0.231	0.124	1.26327692734343e-171
ADPRHL2	4.43421479473129e-176	1.18143262623077	0.227	0.12	1.3333683887757e-171
LCN2	5.41261917042106e-176	1.13835987813489	0.318	0.199	1.62757458454561e-171
DCAF4L1	5.48767404909938e-176	4.09271123397322	0.035	0.002	1.65014358656418e-171
ANKRD36C	8.30070800856072e-176	0.745046756697445	0.16	0.067	2.49602289817421e-171
PDIA5	1.05903877703067e-175	2.26831141924428	0.204	0.102	3.18452960253124e-171
TRAM1	1.15920424150574e-175	0.866377552185367	0.525	0.362	3.48572715420775e-171
ZNF292	1.24721848157879e-175	1.15547657578841	0.387	0.256	3.75038597410741e-171
ANXA1	1.39857503381642e-175	2.39347986558088	0.51	0.427	4.20551512668597e-171
PPP4R3A	2.16028320867247e-175	1.49298628650206	0.303	0.181	6.49597160847812e-171
COP1	3.14422238069495e-175	2.10543338185609	0.209	0.106	9.4546766987497e-171
LRRFIP1	5.82007631349397e-175	0.560582018548965	0.46	0.334	1.75009694746764e-170
SPDEF	7.00187403881779e-175	2.11993237656718	0.177	0.081	2.10546352347251e-170
GOSR2	1.00811759817101e-174	2.20189223688513	0.227	0.12	3.03140961770022e-170
CAPN12	1.42989611002983e-174	1.27225548521137	0.092	0.026	4.2996976028597e-170
QSOX1	1.77693237238592e-174	1.1861660181285	0.307	0.184	5.34323564376447e-170
ZNF841	3.56679101730366e-174	2.93161841777653	0.084	0.022	1.07253405890321e-169
NAB1	5.76711247080371e-174	1.80508813973681	0.173	0.078	1.73417071997068e-169
TOX4	6.20867855117651e-174	1.23470695261646	0.326	0.202	1.86694964033878e-169
TNFAIP1	6.81134419000233e-174	1.08955964893428	0.19	0.09	2.0481711979337e-169
MTDH	6.83804239051333e-174	0.476566923246551	0.532	0.377	2.05619934682736e-169
LARGE2	6.99376879056421e-174	3.92456	0.161	0.072	2.10302627532266e-169
MPZL1	7.82462476844049e-174	0.740575479666563	0.286	0.168	2.35286466787006e-169
PTGER3	8.43677386752471e-174	3.28922115252462	0.054	0.009	2.53693790196468e-169
PTP4A2	9.5035556360455e-174	0.696319827274272	0.45	0.342	2.85771917975888e-169
PLD5	1.6303063518599e-173	6.19788804991681	0.036	0.002	4.90233120004271e-169
SLC25A39	1.74697836940007e-173	1.27041567893625	0.357	0.227	5.25316395678602e-169
UBE2A	1.927136525895e-173	0.58862917039295	0.346	0.219	5.79489953336626e-169
EHMT1	3.24654748365868e-173	1.62028692913221	0.248	0.137	9.76236828336166e-169
KCNMB2-AS1	4.74444746963554e-173	4.25459745093007	0.036	0.002	1.42665535411941e-168
SNRPC	4.75604012932542e-173	1.14493283406155	0.402	0.263	1.43014126688815e-168
TBCE.1	4.95539361977048e-173	3.23720757348925	0.093	0.027	1.49008686146498e-168
AGRN	5.17461533901562e-173	2.27463267044247	0.296	0.179	1.556006832442e-168
COX7A2L	5.77715826966241e-173	0.620076526142185	0.567	0.393	1.73719149168749e-168
CBFB	7.30862890553641e-173	2.47185800668205	0.226	0.122	2.1977047118948e-168
BGLAP	9.30027064751423e-173	4.6206508374307	0.054	0.009	2.79659138370753e-168
GALNT5	1.48453624403481e-172	4.10319519192042	0.052	0.008	4.46400048581268e-168
EMC6	2.28155056322725e-172	0.774294683388989	0.364	0.24	6.86062254362433e-168
DYNLRB1	2.97990729281722e-172	0.756549250971246	0.589	0.397	8.96058122950139e-168
MIA3	5.68320169840194e-172	1.35567117405439	0.313	0.192	1.70893875070946e-167
ELOVL6	6.1239120255426e-172	1.93398155825339	0.113	0.038	1.84146034608066e-167
TEAD1	6.78563876973877e-172	0.291675114025171	0.332	0.204	2.04044157806045e-167
ST3GAL1	7.68644657785269e-172	0.630786169939372	0.216	0.109	2.3113144859603e-167
HS3ST1	1.03819348176761e-171	2.12610093818566	0.116	0.041	3.12184779967521e-167
PTP4A1	2.07364610270145e-171	0.35716443848372	0.317	0.19	6.23545383082327e-167
TWF1	2.16361209279117e-171	1.19068007300528	0.328	0.203	6.50598156302306e-167
CEP350	2.31460860625751e-171	1.44364348628875	0.295	0.176	6.96002807901632e-167
RRAGC	4.66039873546969e-171	1.07430657710294	0.207	0.103	1.40138189975574e-166
TSEN15	4.88173858979066e-171	2.05399556065993	0.178	0.084	1.46793879395005e-166
PTS	5.24429424898814e-171	0.828372907025697	0.315	0.194	1.57695928067073e-166
APOH	6.96712412449365e-171	8.16375	0.026	0	2.09501422423524e-166
HOXC8	7.39397595199011e-171	5.8503341325294	0.027	0	2.22336856876343e-166
BTG3	8.58119803219609e-171	0.247720445549135	0.424	0.29	2.58036624828136e-166
PI3	9.32377109554955e-171	3.04677376553904	0.049	0.007	2.80365796843175e-166
EIF4E	1.05951474677711e-170	0.249039021193777	0.416	0.272	3.18596084355877e-166
DHX32	1.22058987298486e-170	1.54527867901512	0.223	0.117	3.67031374806549e-166
ST7-AS1	1.64560281771428e-170	0.997603201649079	0.095	0.028	4.94832767286684e-166
ATG13	1.79387253180551e-170	2.11876722907977	0.195	0.096	5.39417470313916e-166
UQCRFS1	8.87016966034288e-170	0.516403252094221	0.421	0.291	2.6672600168651e-165
RHEB	9.01735421401763e-170	0.565730396195689	0.489	0.372	2.7115184121551e-165
HOOK3	9.69176723047451e-170	1.26061597715603	0.327	0.204	2.91431440620369e-165
ZNF778	9.92061574142863e-170	2.69298510634672	0.078	0.02	2.98312915344759e-165
DDX39A	1.16138771696008e-169	0.479317122202931	0.265	0.149	3.49229286489895e-165
CDC42BPA	1.42537559183548e-169	2.08492562413555	0.256	0.148	4.2861044046493e-165
PPP1R15B	1.45361167340239e-169	0.218155397398861	0.316	0.183	4.371010301921e-165
PARL	1.63034391971485e-169	1.45801359010629	0.282	0.167	4.90244416658256e-165
SLC35E3	2.25187919487784e-169	2.26692226248338	0.194	0.096	6.77140073899765e-165
UBE2R2	2.43007711345255e-169	0.614932405966115	0.403	0.267	7.30724188015181e-165
AP005233.2	2.7943642144036e-169	5.0524653067802	0.032	0.002	8.40265319271163e-165
ELOC	2.94036325154049e-169	0.182545694626117	0.45	0.319	8.84167229738225e-165
BTF3L4	3.19636315799521e-169	1.24070342093232	0.424	0.287	9.61146401609158e-165
MALL	4.07577655662644e-169	2.16291424890577	0.071	0.016	1.22558601057757e-164
LGALS3BP	4.63255792436787e-169	0.865125935257175	0.486	0.332	1.39301016785742e-164
CUEDC1	5.47903660071687e-169	2.54457448060879	0.207	0.106	1.64754630583556e-164
CBR3	7.58985876027927e-169	0.754706753896631	0.095	0.028	2.28227052921598e-164
KATNBL1	7.9990455391466e-169	1.03129414216424	0.325	0.205	2.40531299362138e-164
FRK	1.11136241754936e-168	2.39091163253561	0.171	0.079	3.34186678957093e-164
TMEM41A	1.16340186621967e-168	1.50572058654434	0.183	0.087	3.49834941172255e-164
PEX2	1.33089345373658e-168	2.43102814538198	0.304	0.191	4.00199661538589e-164
KPNA1	1.45163815804415e-168	1.37586814739081	0.207	0.103	4.36507594123876e-164
POLR2B	2.92085869653352e-168	0.973146993432128	0.319	0.196	8.78302210047629e-164
IPPK	3.15768417263701e-168	1.84054267072324	0.09	0.026	9.49515630711948e-164
ZFP91	4.61702778060285e-168	2.01845703995668	0.224	0.119	1.38834025362728e-163
LRRC59	4.65283875707558e-168	0.193505469831356	0.398	0.264	1.39910861425263e-163
PSMA3	5.78730634299095e-168	0.475616171392864	0.436	0.306	1.74024301733738e-163
GRINA	6.44232198186375e-168	2.06015414228158	0.294	0.182	1.93720621994643e-163
SYTL1	7.52700673270573e-168	2.47235569115165	0.205	0.106	2.26337092452461e-163
ZWINT	7.95702444954115e-168	4.07451029227097	0.086	0.024	2.39267725197702e-163
BYSL	1.015750714414e-167	1.67037171960188	0.159	0.07	3.05436239824289e-163
ECEL1	1.18018706986929e-167	3.28876869371056	0.056	0.01	3.54882251909697e-163
NPAS2	1.55991385014676e-167	1.91812847779061	0.099	0.031	4.69066094739131e-163
DKC1	2.72707601515305e-167	1.30886016133517	0.276	0.164	8.20031757756521e-163
CBLC	6.00163972639683e-167	2.64170822669065	0.168	0.077	1.80469306572753e-162
RANGAP1	6.04536275829413e-167	1.51095740667509	0.189	0.091	1.81784058141904e-162
RAB18	6.29917784063511e-167	0.686968326719089	0.368	0.241	1.89416277667898e-162
UGDH	7.21025129057807e-167	1.19406226192251	0.34	0.218	2.16812256307683e-162
SPNS2	1.45193731595134e-166	2.87290873700227	0.04	0.004	4.36597550906569e-162
DNTTIP1	1.56965215818508e-166	0.987419058891164	0.247	0.14	4.71994403966254e-162
ATP1A1	2.07022119365133e-166	0.712579684058861	0.473	0.31	6.22515512930956e-162
PNP	2.09154400011016e-166	0.568143727562166	0.273	0.157	6.28927280833126e-162
GOLPH3L	2.26557560629367e-166	2.61330669880681	0.239	0.136	6.81258584812506e-162
PSPC1	3.56706151361408e-166	1.69363895316652	0.251	0.142	1.07261539714375e-161
CDYL	4.4484020527983e-166	1.27108560063795	0.232	0.124	1.33763449727645e-161
DYNC1LI1	9.45151967255367e-166	0.98385940990716	0.31	0.191	2.84207196553689e-161
TMEM68	1.1008196779393e-165	2.58797185098055	0.214	0.113	3.31016477156347e-161
PKM	2.22624862756469e-165	0.434724088892528	0.497	0.34	6.69432962308704e-161
RNF6	3.27285604449788e-165	1.69548540102286	0.202	0.102	9.84147812580513e-161
PLAGL2	3.40738678439893e-165	2.11158179065671	0.18	0.086	1.02460120606876e-160
ILRUN	3.44719048676757e-165	3.48916313217354	0.055	0.01	1.03657017937101e-160
SPPL2A	3.71383438458272e-165	1.05195696058737	0.344	0.219	1.11674999944402e-160
AC025580.2	3.88245453352749e-165	2.90622447101051	0.048	0.007	1.16745407823172e-160
YJEFN3	5.38021430156035e-165	2.18844354877351	0.089	0.026	1.6178304404792e-160
DYM	5.88308666996812e-165	2.47862423728299	0.227	0.125	1.76904416165941e-160
TRIM25	6.98414433042807e-165	1.3889664999609	0.283	0.168	2.10013220015972e-160
DHCR7	7.15055742534302e-165	2.06601998908621	0.12	0.044	2.15017261780065e-160
PIGT	8.66516533969737e-165	1.10375822121187	0.366	0.24	2.605615217647e-160
STXBP5	8.89333342967976e-165	3.19348255329584	0.149	0.065	2.6742253623047e-160
PNPLA3	1.06609561165394e-164	3.15438121179985	0.056	0.01	3.2057495042434e-160
SMPD4	1.25184021846052e-164	1.77472961031459	0.18	0.085	3.76428353691078e-160
CNIH4	1.69903686366452e-164	0.431632375018831	0.388	0.264	5.10900384903922e-160
SH3RF1	1.78906622699047e-164	1.89175380644282	0.181	0.086	5.37972214456033e-160
SPEN	2.52077904779676e-164	0.936663885952357	0.33	0.206	7.57998259672485e-160
CUL3	3.93257415026231e-164	1.09634230604198	0.343	0.219	1.18252504698388e-159
SNW1	4.62577191062942e-164	0.499963842271876	0.36	0.236	1.39096961352627e-159
CREB3	4.86620854013214e-164	1.27713218709668	0.29	0.176	1.46326890801773e-159
GINM1	8.6472232550039e-164	0.959081020437346	0.382	0.254	2.60022003277967e-159
SMIM15	1.24284100233201e-163	1.24401148682161	0.343	0.22	3.73722289401236e-159
HOXB5	1.53386366197167e-163	0.154355620823893	0.051	0.159	4.61232803154882e-159
ANKS1A	1.61824734773053e-163	3.32993449119123	0.17	0.081	4.8660697746257e-159
RFLNB	1.68233770760196e-163	1.26782353217306	0.063	0.013	5.05878948675909e-159
TBL2	1.85151017540772e-163	1.99920516532563	0.204	0.105	5.56749109745102e-159
ZRANB2	2.41603994741411e-163	0.765807297329692	0.412	0.277	7.26503212187422e-159
DNAJC25	2.88392830988256e-163	1.87768184183193	0.166	0.076	8.67197242781685e-159
PSMD4	4.39637223589963e-163	0.538718096347586	0.399	0.268	1.32198913133502e-158
PLIN4	5.21849527788889e-163	6.24932737032448	0.037	0.003	1.56920153006119e-158
CNOT11	6.17633841302063e-163	2.67220192954992	0.276	0.169	1.8572249607953e-158
YWHAZ	6.36959044903343e-163	0.335272558227586	0.587	0.445	1.91533584802435e-158
HSF4	6.52656220157937e-163	4.03687594793909	0.101	0.034	1.96253725401492e-158
BCL2L11	6.80203548217347e-163	1.96948791895344	0.165	0.076	2.04537206948956e-158
DCAF6	7.76617249015794e-163	2.67851385165043	0.261	0.158	2.33528806779049e-158
FDFT1	8.14091897999308e-163	1.23674084228997	0.33	0.208	2.44797433728392e-158
GJB6	8.46196128051913e-163	3.48844932724124	0.051	0.008	2.5445117570521e-158
PHF8	8.6640087799596e-163	3.28020660888059	0.161	0.075	2.60526744013385e-158
ZNF165	1.12799707349233e-162	1.92307503480837	0.118	0.043	3.39188719999144e-158
ENTPD3	1.16947570307041e-162	3.01671382594146	0.099	0.032	3.51661343913271e-158
GALNT12	1.21333410346767e-162	3.21949632999904	0.108	0.038	3.64849564912729e-158
CHKA	1.24495201052817e-162	2.08352330483568	0.17	0.079	3.7435706956582e-158
REN	1.32748300810932e-162	0.488365175833902	0.051	0.008	3.99174140538472e-158
SREBF2	1.46211026246668e-162	2.30929231481485	0.215	0.114	4.3965655592373e-158
CNOT9	1.52473216669221e-162	2.05922598838806	0.209	0.109	4.58486962524347e-158
CHGA	1.65760564246377e-162	3.64997323728716	0.05	0.008	4.98442016688855e-158
BACH1	1.66326444431467e-162	0.9615959879693	0.254	0.141	5.00143618405421e-158
KDELR2	1.94003718767821e-162	0.216662453355941	0.53	0.381	5.83369182334837e-158
ABR	2.48671831997563e-162	1.62810460171648	0.158	0.07	7.47756198816671e-158
HERC4	2.59085289239823e-162	1.43153666067669	0.31	0.193	7.79069464744149e-158
CBX4	2.63608516856326e-162	0.991227029480593	0.173	0.08	7.92670810186973e-158
R3HDM4	2.885873983705e-162	1.03304288629374	0.267	0.153	8.67782306900093e-158
SH3GL1	2.90254560108242e-162	0.457315196709742	0.231	0.122	8.72795462245484e-158
RASGRF2	3.23263430841107e-162	4.30807221540258	0.048	0.007	9.7205313653921e-158
GGNBP2	3.25632287985445e-162	0.553314559407001	0.359	0.233	9.79176289972232e-158
FOLH1	3.52461915419956e-162	3.48558309102035	0.1	0.033	1.05985297966781e-157
DPP9	3.62516663925654e-162	1.72868500673294	0.171	0.079	1.09008760842444e-157
UFD1	4.19718501385987e-162	0.536819555868905	0.347	0.227	1.26209353366766e-157
NFX1	4.79762303802511e-162	2.0982439852138	0.205	0.106	1.44264524753415e-157
ZNF561	5.93465364205185e-162	2.73756126156712	0.182	0.089	1.78455035016499e-157
EPS15L1	7.73709100191183e-162	2.14179992662041	0.155	0.068	2.32654326427489e-157
NACA2	8.70081431934885e-162	2.34228611578935	0.041	0.004	2.6163348658282e-157
ABI1	8.86549990069461e-162	0.959601404660708	0.287	0.171	2.66585582013887e-157
RO60	9.72917442000933e-162	2.43091729586928	0.088	0.026	2.9255627480968e-157
POLR3C	1.30127509752226e-161	2.53587071019027	0.157	0.07	3.91293421824943e-157
KLHL12	2.01712783274381e-161	3.38340989576704	0.137	0.058	6.06550339306065e-157
SCRN1	2.75036047498463e-161	2.05463785590664	0.175	0.083	8.27033394827879e-157
AC106739.2	2.91155931463335e-161	1.74718520095082	0.038	0.004	8.75505885910249e-157
SERPINB9P1	3.02927355004233e-161	2.35912001936842	0.041	0.005	9.10902556497728e-157
RHOA	3.11718113693275e-161	0.374790379067209	0.588	0.427	9.37336367875677e-157
ZFR2	3.93408069679362e-161	5.39682343564478	0.032	0.002	1.18297806552584e-156
SLC30A9	6.52699984484961e-161	2.49705640173763	0.247	0.144	1.96266885334628e-156
TMEM167A	6.70117475861334e-161	0.560707935139855	0.429	0.289	2.01504324991503e-156
TFDP1	7.46971083468749e-161	2.32824285143096	0.241	0.139	2.24614204799053e-156
USP6NL	7.67790415764355e-161	2.32410013794748	0.174	0.083	2.30874578020342e-156
KISS1R	7.82058121910437e-161	4.57797036010901	0.033	0.002	2.35164877258468e-156
MARVELD2	8.678535433236e-161	2.89974819258019	0.22	0.121	2.60963560477407e-156
TMPRSS3	8.90242751623541e-161	2.87184458720004	0.152	0.067	2.67695995413199e-156
WARS	1.18733323150462e-160	1.60551852899308	0.235	0.129	3.57031102713439e-156
TOMM40	1.2462255956801e-160	0.864416511559178	0.278	0.167	3.74740036621006e-156
DUSP14	1.39490765055832e-160	0.34203807623173	0.268	0.151	4.19448730522887e-156
ZFR	1.81034631917961e-160	1.12530284825995	0.334	0.212	5.44371138177309e-156
FA2H	1.95610274804566e-160	4.40967658739091	0.046	0.006	5.88200096337329e-156
NDUFAF8	2.92196726467171e-160	1.33555954329572	0.369	0.244	8.78635556486783e-156
TIAL1	3.13613851322637e-160	1.16783792375364	0.377	0.25	9.43036850927171e-156
GRIN2C	3.31423978936102e-160	5.95872733169888	0.028	0.001	9.9659190466086e-156
VDAC1	3.86080736287725e-160	0.474961440614596	0.481	0.339	1.16094477401719e-155
ZFC3H1	4.68647719681754e-160	0.818359112557404	0.256	0.143	1.40922369308303e-155
MACO1	4.94829844429476e-160	1.47856471535105	0.238	0.132	1.48795334219944e-155
EPS8L2	5.24029545370394e-160	1.85767010543492	0.274	0.163	1.57575684292877e-155
SMG7	6.02452423072003e-160	1.2431994415684	0.22	0.116	1.81157443617751e-155
SMIM14	6.09018062251532e-160	1.50380394866292	0.373	0.254	1.83131731319036e-155
NIFK	6.69882273086369e-160	0.57976414755796	0.354	0.233	2.01433599517071e-155
ATG3	1.25945092084061e-159	1.31609014704665	0.296	0.184	3.7871689189677e-155
DCTN6	1.77243529175113e-159	0.755089486161674	0.336	0.215	5.32971292229563e-155
CDC42EP3	1.82759939704405e-159	1.11254122015796	0.242	0.134	5.49559138691146e-155
AC009414.2	2.58860350987133e-159	1.50368791512454	0.064	0.014	7.7839307541831e-155
SNX9	2.95241393707371e-159	0.339186772680983	0.337	0.217	8.87790870878063e-155
TLNRD1	3.59067678939613e-159	0.597024504660122	0.211	0.109	1.07971651057142e-154
INTS11	3.84069225983128e-159	1.70375834295986	0.307	0.191	1.15489616253126e-154
ENDOU	3.95288151102e-159	3.91755236984005	0.027	0.001	1.18863147036371e-154
SHTN1	4.07505090761929e-159	1.86583921480358	0.279	0.167	1.22536780792112e-154
HMGXB4	7.7609179181373e-159	1.46702038036664	0.259	0.151	2.33370801798389e-154
PPM1G	8.97285086335016e-159	0.597643650510131	0.392	0.266	2.69813625460939e-154
PLPP5	1.01460586104438e-158	1.09002883984128	0.378	0.248	3.05091982416044e-154
AC244035.1	1.33246664094683e-158	5.65685238895665	0.029	0.001	4.00672718932713e-154
B3GNT5	1.4276443882612e-158	1.08819769003997	0.145	0.06	4.29292667550142e-154
KXD1	1.53531232079615e-158	1.44534365449912	0.276	0.166	4.61668414863403e-154
HMGCS1	1.54368636271974e-158	0.336990252018236	0.261	0.145	4.64186489269826e-154
ACTR1B	1.98263178725736e-158	1.70305365871398	0.207	0.108	5.96177378428289e-154
TOP2A	2.16680869934789e-158	3.37097155033741	0.054	0.01	6.51559375893909e-154
TCEA3	2.90146183403498e-158	2.81030519261507	0.197	0.104	8.72469573494317e-154
FOXC2	3.12161281533686e-158	2.87539185456581	0.033	0.002	9.38668973571794e-154
GIPC1	3.62902042233943e-158	1.06064286881919	0.326	0.208	1.09124644099747e-153
GHITM	4.44672431162524e-158	0.415158456297927	0.424	0.296	1.33713000050571e-153
ANP32E	5.29544244174631e-158	1.30432208197197	0.288	0.175	1.59233954223311e-153
ACTR2	5.94173780121916e-158	0.459657367535365	0.436	0.298	1.7866805568266e-153
UBQLN1	6.28286373267015e-158	0.366408323798363	0.313	0.193	1.88925712441391e-153
ELOA	6.43745750208942e-158	1.32743399707692	0.21	0.11	1.93574347087829e-153
BCAS2	6.53112643790422e-158	0.591867031564117	0.351	0.232	1.9639097198778e-153
SURF4	6.71698350408353e-158	0.401868812994172	0.394	0.26	2.01979693967792e-153
PLEKHO1	8.85493005072015e-158	0.229490767663387	0.229	0.117	2.66267746625155e-153
YTHDF1	8.97514255462115e-158	0.964229924550936	0.211	0.111	2.69882536617458e-153
RNF141	1.0099615704272e-157	2.43700777316921	0.205	0.109	3.03695444227458e-153
FUBP3	1.3123576697567e-157	1.72582320389398	0.224	0.122	3.94625951295841e-153
RC3H1	1.55872844646129e-157	1.5672399724833	0.248	0.141	4.68709643850911e-153
AFTPH	2.02375504716371e-157	1.67954091910941	0.249	0.142	6.08543142682127e-153
ANKRD11	3.33379997840129e-157	0.504432696877746	0.432	0.299	1.00247365350527e-152
CYR61	3.5158206387122e-157	1.03841448225888	0.37	0.245	1.05720726606076e-152
CTTN	4.38621243652267e-157	0.400959258836139	0.453	0.316	1.31893407966237e-152
PACSIN3	4.60639935682017e-157	1.75606624077937	0.147	0.063	1.38514428659583e-152
GNGT1	5.08102143768342e-157	5.77416531448952	0.033	0.002	1.5278631463114e-152
MAP1LC3C	6.19915123248101e-157	10.5364527138852	0.025	0	1.86408477560704e-152
CIB1	6.82513773294257e-157	0.515902907333348	0.49	0.352	2.05231891629583e-152
VCPKMT	7.52225949226469e-157	1.97349382750981	0.128	0.05	2.26194342932399e-152
HACD2	8.62387539823803e-157	1.61327956865406	0.255	0.149	2.59319933225018e-152
SMURF1	1.89999919609859e-156	1.46842250100435	0.159	0.071	5.71329758266846e-152
PPTC7	2.13964903588163e-156	0.78164005485818	0.186	0.09	6.43392465089605e-152
MIEF1	3.00861621054591e-156	1.45406653786749	0.154	0.069	9.04690894511154e-152
GRPEL2	3.49402009591919e-156	1.47062145978603	0.095	0.031	1.0506518428429e-151
LTBR	8.23076829597116e-156	1.14161283092519	0.315	0.199	2.47499202659853e-151
GNAI3	1.12391471754551e-155	0.587796150121065	0.395	0.267	3.37961155565936e-151
ACTR3B	1.23144249637145e-155	2.08339676567252	0.118	0.045	3.70294758658894e-151
CYB5R2	1.27224971812162e-155	1.49451075990932	0.116	0.043	3.82565490239171e-151
ARHGAP29	1.30795407786195e-155	1.40210578972884	0.266	0.157	3.93301791213088e-151
OTUD4	2.37917163165371e-155	1.44303649656952	0.227	0.124	7.1541690963827e-151
SEC23A	2.3795879931277e-155	1.08532858940544	0.256	0.147	7.155421095335e-151
BST2	2.89940308174461e-155	1.25674895010438	0.325	0.205	8.71850506680606e-151
AC092687.3	2.90920306565803e-155	1.49889819314224	0.048	0.008	8.74797361843368e-151
DUS4L	3.06082708681291e-155	2.14767844748368	0.127	0.05	9.20390705004643e-151
CABLES1	3.3460023877503e-155	2.17614365357196	0.151	0.067	1.00614291799651e-150
MMP24OS	3.90279641008094e-155	1.17639166740446	0.382	0.253	1.17357088051134e-150
GPBP1L1	4.68654231051324e-155	2.04491430374857	0.296	0.186	1.40924327277133e-150
PSMD2	5.19217283189553e-155	0.496445956882467	0.371	0.254	1.56128637055099e-150
CD55	5.43033645253658e-155	0.871609964316684	0.48	0.356	1.63290217127775e-150
SSH2	6.89124827111629e-155	1.61621027485163	0.205	0.107	2.07219835512467e-150
GTF2F2	7.31038196149405e-155	0.891437107558793	0.283	0.173	2.19823185582126e-150
LARP4B	9.38174540270332e-155	1.44128	0.249	0.143	2.82109084259289e-150
LINC02539	1.12394633146788e-154	5.37424796110306	0.024	0	3.37970661872391e-150
CDC42BPG	1.1371853398361e-154	3.04818470524878	0.075	0.02	3.41951631688717e-150
TMED3	1.31379858314129e-154	0.906434790627468	0.379	0.255	3.95059233950587e-150
GTF2A2	1.59901918597129e-154	0.355372311616481	0.437	0.304	4.80825069221567e-150
TTC6	2.581418917301e-154	11.7526455217602	0.023	0	7.76232668432411e-150
SUPT5H	3.30715665784823e-154	0.970287805346612	0.294	0.18	9.94462007014963e-150
RABGEF1	5.79943996093317e-154	1.75678838229141	0.134	0.054	1.74389159625261e-149
YKT6	6.7256796080226e-154	1.67650955634434	0.181	0.089	2.0224118581324e-149
XPR1	6.94221198008623e-154	2.95842724904878	0.237	0.139	2.08752314241193e-149
DPH3	7.06831543990409e-154	0.597964177494554	0.238	0.131	2.12544245277916e-149
PUM2	1.22497945462059e-153	1.8840522776618	0.276	0.169	3.68351322004411e-149
AC008264.2	1.5386592604862e-153	2.49009071054812	0.053	0.01	4.626748396282e-149
C1QBP	1.64316560167621e-153	0.420171873873109	0.439	0.303	4.94099896424036e-149
TRAPPC6B	3.06119864676279e-153	2.22268160375003	0.2	0.104	9.20502433081569e-149
GTF2IRD1	3.61627045987049e-153	1.99027577745019	0.145	0.062	1.08741252728306e-148
HSPD1	6.74720421389034e-153	0.694415987268084	0.565	0.451	2.02888430711683e-148
TTC19	7.4923849083238e-153	0.880135854619236	0.335	0.216	2.25296014193297e-148
NKD2	9.53706041994939e-153	1.14694608622799	0.047	0.007	2.86779406827878e-148
MARK2	9.64347880070926e-153	1.86943617925716	0.225	0.123	2.89979407537328e-148
EMC7	9.8753282649439e-153	0.913725975389342	0.382	0.259	2.96951120926863e-148
JPT1	1.08108274373492e-152	0.620323806986409	0.377	0.261	3.2508158104109e-148
PLEKHA8	1.28061750439282e-152	1.74692929362111	0.129	0.052	3.85081683570921e-148
PEBP4	1.32806909862302e-152	3.42401857148488	0.034	0.003	3.99350377955942e-148
ZNF185	1.735447693122e-152	2.1473972691472	0.163	0.076	5.21849121321785e-148
ECHS1	1.81049976600708e-152	0.929188523978074	0.456	0.317	5.4441727963833e-148
HIVEP2	1.82305131348502e-152	1.03908265537338	0.213	0.112	5.48191529964944e-148
NUDC	1.88321433643743e-152	0.453118021340368	0.46	0.333	5.66282550966735e-148
RAB21	2.62904608734626e-152	0.272077863927485	0.356	0.228	7.90554158465022e-148
ORM2	3.32547738669831e-152	4.07943128280132	0.044	0.006	9.9997105018018e-148
GOLT1A	3.42461864117906e-152	1.99994850612978	0.07	0.018	1.02978282540254e-147
SLC30A1	3.6262205005666e-152	1.93661366067091	0.269	0.163	1.09040450452038e-147
TMEM9	4.50510343931676e-152	1.06712501874886	0.348	0.231	1.35468460420255e-147
COL2A1	5.74007326479987e-152	7.86124026257737	0.026	0.001	1.72604003072532e-147
C1orf116	7.70039757691825e-152	2.54958626000414	0.092	0.029	2.31550955137932e-147
RBCK1	1.16607359750789e-151	0.714963781182631	0.349	0.231	3.50638330770622e-147
ORAI1	1.19237410582401e-151	1.39738403365676	0.196	0.102	3.5854689362128e-147
NEMF	1.37318333127458e-151	1.17942063481083	0.333	0.215	4.12916227714265e-147
CLCA4	1.45828840848821e-151	4.83531250462632	0.03	0.002	4.38507324432405e-147
C16orf89	1.4966690748764e-151	2.64100675046982	0.065	0.015	4.50048390815333e-147
UBTD2	1.70582580513709e-151	1.58061151598068	0.189	0.095	5.12941819604723e-147
BABAM1	1.92551484153235e-151	1.6999843123405	0.288	0.179	5.79002312848777e-147
SLFN5	2.19377461525508e-151	0.997460997605867	0.367	0.241	6.59668026807202e-147
TNF	2.62936921301081e-151	0.482381144831901	0.081	0.023	7.9065132235235e-147
CXorf38	3.89079038939088e-151	1.7810025051627	0.203	0.107	1.16996067008984e-146
PLEKHA3	4.05964878340822e-151	1.04842585838448	0.285	0.175	1.22073638917085e-146
TPD52	4.37833635673823e-151	2.30267467401918	0.274	0.17	1.31656574247119e-146
CLTB	6.05155025831115e-151	0.253871088709465	0.411	0.289	1.81970116267416e-146
CLASRP	7.58318515525768e-151	1.82847207451889	0.183	0.091	2.28026377618598e-146
TANK	8.74240336571215e-151	0.828652300343788	0.326	0.21	2.62884069206964e-146
AHNAK	9.05877302408334e-151	0.648097387603198	0.523	0.39	2.72397304834186e-146
WAPL	9.11736031707202e-151	1.29265157646413	0.278	0.169	2.74159024734356e-146
VPS26A	9.21705502835302e-151	1.27088340717351	0.315	0.201	2.77156844702575e-146
CENPA	9.54973446336832e-151	3.53167204499748	0.031	0.002	2.87160515313485e-146
CYP51A1	1.1406752217584e-150	2.73119362434512	0.125	0.05	3.43001039182752e-146
PPP3R1	1.14645297404997e-150	2.24394563328012	0.172	0.084	3.44738409296826e-146
PSMB1	1.25115754548698e-150	0.460082522528921	0.554	0.429	3.76223073927934e-146
ARMC8	1.49355612465997e-150	1.75388009183864	0.213	0.115	4.49112326685253e-146
TMEM97	1.76638180956838e-150	2.94255094441225	0.134	0.057	5.31151010137213e-146
ATP6V0A4	1.78780454602117e-150	6.97611037604096	0.032	0.002	5.37592826988565e-146
RASSF1	3.31872272259871e-150	0.318134161701585	0.149	0.064	9.97939922685432e-146
SLC25A32	3.46009685207739e-150	1.77929955670215	0.133	0.055	1.04045112341967e-145
SPRED2	3.7536565439593e-150	1.39976297615452	0.132	0.054	1.12872452276856e-145
MKNK2	4.34306496762621e-150	0.938872946452207	0.339	0.22	1.3059596357652e-145
TPM3	4.73752926806895e-150	0.553136427374128	0.455	0.35	1.42457505090833e-145
EIF3L	5.11749145751478e-150	0.438130879207292	0.543	0.383	1.53882968127469e-145
IKZF3	6.69955311470094e-150	2.2563041731561	0.07	0.018	2.01455562159057e-145
MPP5	7.07653318768754e-150	1.79051216121529	0.188	0.095	2.12791352953764e-145
POLR2K	8.30315183818263e-150	0.463717615877685	0.422	0.291	2.49675775774152e-145
TNFRSF9	1.1615025201072e-149	1.89065355957425	0.048	0.008	3.49263807796236e-145
SIPA1L1	1.63656141392498e-149	1.25432037371981	0.212	0.113	4.92114017167242e-145
DCAF16	2.31396940751649e-149	2.90126343046804	0.182	0.094	6.95810600840209e-145
MYH11	2.67189273922701e-149	2.96470600259287	0.101	0.036	8.03438146685562e-145
LURAP1L	2.67204583935894e-149	2.20763462564026	0.106	0.038	8.03484183895233e-145
SMNDC1	2.86588725213479e-149	0.605756567093384	0.262	0.153	8.61772296716933e-145
LHX4	3.06963874686919e-149	3.10406963456854	0.036	0.004	9.23040371183565e-145
POU2F2	3.59434897754128e-149	1.77710006778838	0.055	0.011	1.08082073754666e-144
PSAT1	5.62164858586345e-149	1.43875468512858	0.269	0.154	1.69042972976914e-144
GADD45A	5.64030402802649e-149	1.5241124634312	0.511	0.421	1.69603942122756e-144
GPCPD1	7.35540068484395e-149	1.06257510601879	0.254	0.147	2.21176898593258e-144
GBE1	7.54072902929835e-149	2.31322949349845	0.202	0.109	2.26749721911001e-144
UBA5	9.05990807451159e-149	2.1169346842374	0.22	0.123	2.72431435800564e-144
ABCC3	1.04894804550164e-148	1.58855413449722	0.279	0.17	3.15418677282344e-144
DHDH	1.35610407008624e-148	4.74474023571312	0.025	0.001	4.07780493874933e-144
XDH	1.39544183079694e-148	3.90811169337515	0.051	0.009	4.19609358520641e-144
TSN	1.43765757630383e-148	1.56239480254794	0.28	0.173	4.3230363319456e-144
PLA2G4B	1.60949573920448e-148	4.02436426590753	0.04	0.005	4.83975368778787e-144
UXS1	1.81342725803699e-148	1.42713787291641	0.305	0.191	5.45297576491723e-144
CLDN1	2.4152072959953e-148	2.16307989060582	0.101	0.035	7.26252833905788e-144
EIF2AK1	2.43826522447847e-148	2.09551692889927	0.303	0.197	7.33186353000676e-144
SEC24D	3.2239868236571e-148	0.757248104283161	0.238	0.131	9.6945283787369e-144
SENP6	3.55028278809181e-148	1.52381409670735	0.341	0.226	1.06757003437921e-143
CCDC124	4.52270566510868e-148	0.573042831205059	0.33	0.213	1.35997759349818e-143
EMG1.1	4.81015743368175e-148	2.85715093300389	0.046	0.007	1.4464143403081e-143
TOP2B	5.35144912643903e-148	1.51413031677456	0.317	0.204	1.60918075232022e-143
SERPINB8	1.03453732225345e-147	0.525544554493619	0.116	0.044	3.11085372801612e-143
RALY	1.4385398762733e-147	0.316979143871504	0.36	0.241	4.32568940795382e-143
H2AFY	1.45515320418637e-147	0.40168474091947	0.454	0.318	4.37564568498841e-143
DNAJA2	3.77448902590934e-147	0.944197549894713	0.37	0.248	1.13498885009094e-142
FJX1	3.77733235486192e-147	0.459889353603014	0.16	0.074	1.13584383910698e-142
ACTG2	4.59377139162371e-147	3.37228	0.064	0.016	1.38134705746125e-142
MTRNR2L8	4.60110558634981e-147	0.501990906312217	0.414	0.24	1.38355244981539e-142
DHX9	4.64641844665347e-147	1.00847124549889	0.36	0.241	1.3971780269087e-142
CREM	4.77926605763051e-147	0.123232962962133	0.298	0.177	1.4371253035295e-142
GNG12	5.98806643323918e-147	1.08240278859684	0.303	0.193	1.80061157647502e-142
ATF6	6.73948268890528e-147	1.54978251739898	0.266	0.161	2.02656244455382e-142
CHMP1B	7.37203129484745e-147	0.266626865723869	0.39	0.265	2.21676981036063e-142
DYNC1LI2	7.43885343845554e-147	1.24521526567076	0.393	0.269	2.23686322894358e-142
NOL10	8.91970608322157e-147	1.5042113832266	0.192	0.099	2.68215561922473e-142
BOD1L1	9.96117826330372e-147	0.591809061752797	0.404	0.277	2.99532630377543e-142
RND1	1.12509982937892e-146	0.905697009654767	0.061	0.013	3.38317518694242e-142
DPP7	1.31339420999548e-146	0.811233081741259	0.422	0.291	3.94937638945641e-142
AMD1	1.54425424072119e-146	0.580068013565552	0.454	0.319	4.64357250184862e-142
IRX2	2.42056512157092e-146	2.64341814840311	0.029	0.002	7.27863932056377e-142
FAM174C	2.83339037548791e-146	3.37765830268246	0.06	0.013	8.52000485909215e-142
PFN2	2.88532922428929e-146	2.36217542398534	0.224	0.128	8.6761849774379e-142
GTF2H1	3.20187515205147e-146	1.73495878393257	0.192	0.099	9.62803858221877e-142
WDR33	4.24455900156855e-146	1.49730899935504	0.331	0.219	1.27633889177166e-141
CDC123	4.64295714878824e-146	1.11831495396262	0.319	0.206	1.39613721464062e-141
CYBA	5.00048718383884e-146	0.410788424246195	0.589	0.384	1.50364649618034e-141
PLGLB2	5.13285664617819e-146	6.8848689275299	0.025	0.001	1.54344999350578e-141
INSIG2	5.15191310967432e-146	1.37603185774878	0.202	0.106	1.54918027207907e-141
ATP6V0B	5.37238458164517e-146	0.347245620418553	0.488	0.36	1.6154760437007e-141
GBA	6.05118097016566e-146	2.77479514279379	0.149	0.069	1.81959011772881e-141
AHCTF1	6.09183097662396e-146	1.01965506069577	0.212	0.114	1.83181357467082e-141
TRIP10	6.11040446788989e-146	1.01322777418049	0.251	0.145	1.83739862349449e-141
CCNE1	7.00799150497606e-146	4.30382859290649	0.088	0.028	2.1073030455463e-141
PHF10	9.0567257574729e-146	2.00679499417763	0.247	0.148	2.7233574352721e-141
METTL2A	1.17685959472013e-145	2.21291545263651	0.19	0.099	3.53881680132343e-141
MROH1	1.51994619521842e-145	2.71871769084623	0.183	0.095	4.57047820902178e-141
PRPF3	2.06055751427795e-145	2.59044938434064	0.171	0.085	6.1960964454338e-141
DOT1L	2.27951336919825e-145	2.03307114246518	0.153	0.07	6.85449670117914e-141
MARS	2.67631680213836e-145	1.02597089463112	0.184	0.093	8.04768462403005e-141
ENTPD6	4.46776789022527e-145	2.45325451575917	0.166	0.082	1.34345780459074e-140
PDE8A	4.65562879045918e-145	1.59105216500731	0.159	0.074	1.39994757729107e-140
GRIN2D	5.03344935210708e-145	6.00184226924186	0.025	0.001	1.5135582201786e-140
SLC37A1	6.8626597088286e-145	2.80592465313229	0.135	0.059	2.06360177444476e-140
PSMB5	8.49436965864069e-145	0.35847348267953	0.479	0.344	2.55425695635326e-140
FAM168B	1.07121318642568e-144	1.3014790273561	0.22	0.122	3.22113805158201e-140
PPP1R12B	2.46892145819973e-144	2.77453460216557	0.152	0.072	7.42404682480659e-140
CYC1	2.51375549766395e-144	0.732045886219944	0.384	0.259	7.55886278147549e-140
IGF2R	2.55901666402338e-144	1.45290317078681	0.26	0.156	7.6949631087183e-140
COPG1	2.61428330591761e-144	1.8378152590166	0.273	0.169	7.86114990089424e-140
PRPF38A	2.73459062743043e-144	1.6766035985796	0.284	0.178	8.22291401668332e-140
HSF1	3.45558030288358e-144	1.2501624326392	0.283	0.175	1.03909299707709e-139
KRT17	3.57877840504803e-144	2.23518637196001	0.107	0.039	1.07613866639794e-139
SPATA13	4.1979255837419e-144	1.11597826640792	0.202	0.106	1.26231622303119e-139
TTC13	5.03349140477762e-144	3.32028864772055	0.079	0.024	1.51357086541663e-139
SDF2L1	6.26671927101967e-144	0.332372338738963	0.399	0.271	1.88440248479561e-139
CNPY3	7.79553623816117e-144	1.73477191988238	0.304	0.197	2.34411774681506e-139
STAP2	9.25886493598618e-144	1.65672633127304	0.214	0.118	2.78414068625105e-139
TFG	9.29425098244451e-144	0.588589324390859	0.43	0.297	2.79478127042106e-139
LMAN2	9.87083857634398e-144	0.583407749841259	0.544	0.38	2.96816115990664e-139
MED6	1.04946895944317e-143	1.10359311825133	0.249	0.146	3.1557531610456e-139
POGZ	1.28827391350102e-143	1.60499803735756	0.302	0.194	3.87383965789756e-139
P2RX4	1.62454793515786e-143	1.96930040072436	0.198	0.105	4.88501564101968e-139
ATXN10	1.73545321329316e-143	0.895660955708349	0.393	0.267	5.21850781237252e-139
RAB1A	2.27389992460628e-143	0.183738634404388	0.452	0.317	6.83761707329107e-139
KCNN2	2.39872842989437e-143	5.48098116295835	0.04	0.005	7.21297638869236e-139
ORM1	2.53168365810719e-143	3.99987947319678	0.048	0.008	7.61277275992832e-139
PISD	2.81655490257645e-143	0.842114755642893	0.222	0.122	8.46938059204738e-139
TNIP2	2.94747174280558e-143	1.15162989327592	0.275	0.172	8.86304753061639e-139
VPS37B	3.67395589237559e-143	0.663388318384371	0.243	0.138	1.10475853683734e-138
CRLS1	3.8075843297127e-143	1.89010686461263	0.269	0.167	1.14494060794461e-138
SH3RF2	3.86517302630979e-143	3.75049224203986	0.083	0.026	1.16225752901135e-138
NGDN	4.71811023373168e-143	0.90270497348649	0.239	0.138	1.41873574728312e-138
KIAA1143	4.7396575414708e-143	1.76651524888095	0.248	0.147	1.42521502272027e-138
AP006623.1	4.79813348421937e-143	0.768722418064001	0.054	0.011	1.44279873870477e-138
MROH2A	6.00185906399085e-143	11.7255447068495	0.022	0	1.80475902054205e-138
NKIRAS2	1.10139815270801e-142	0.95756408178122	0.211	0.115	3.31190424519297e-138
DENND4B	1.19542060099257e-142	2.37663662702647	0.121	0.05	3.59462974718465e-138
TAF1D	1.21021669599854e-142	0.352992624249691	0.513	0.37	3.6391216048676e-138
RBM25	1.21409300288356e-142	0.27134521253054	0.504	0.363	3.65077765967087e-138
KRR1	1.28696958645547e-142	0.572408268907939	0.333	0.22	3.8699175464716e-138
KIF23	1.59251249098958e-142	3.1335831771358	0.041	0.006	4.78868506040566e-138
ATP1B3	1.60659277045837e-142	0.664079683366888	0.417	0.288	4.83102446076832e-138
ARHGAP17	1.93467016651983e-142	1.66734671880272	0.181	0.092	5.81755319072513e-138
CTPS1	2.4326663345727e-142	2.09060669861848	0.126	0.052	7.31502766806012e-138
EPHA7	3.31009820162055e-142	4.14662349598314	0.083	0.026	9.95346529227298e-138
TAF7	3.3141139103543e-142	0.417872428306484	0.421	0.29	9.96554052843537e-138
CSPG5	4.34176419236797e-142	6.1674836586135	0.029	0.002	1.30556849264505e-137
NOS2	5.35441235766039e-142	8.47626859456823	0.022	0	1.61007179594848e-137
ANKRD33B	9.2106503130533e-142	0.50136229283198	0.1	0.035	2.76964254913513e-137
CMIP	2.06654198441769e-141	0.772733466912976	0.217	0.118	6.21409174714398e-137
HNRNPF	2.8033261250947e-141	0.475653778456969	0.52	0.369	8.42960165815978e-137
HSH2D	3.84316408716263e-141	1.91880970877711	0.1	0.036	1.1556394410098e-136
ZNF827	4.40695007095967e-141	1.85374994599349	0.163	0.079	1.32516988633757e-136
PIK3CB	4.82991301903835e-141	2.34931881300266	0.16	0.077	1.45235484482483e-136
HNRNPUL1	5.92743763780549e-141	1.04464390300717	0.361	0.243	1.78238049768811e-136
UBP1	7.52845207888563e-141	2.41922022154054	0.173	0.089	2.26380554012091e-136
ARNTL2	7.95128320337605e-141	2.05946547628671	0.095	0.033	2.39095085925518e-136
BCL9L	9.53239437602187e-141	0.994384890330447	0.213	0.116	2.86639098886978e-136
TOP1	9.71404829150427e-141	0.249632219729097	0.492	0.356	2.92101432125534e-136
HM13	1.13689315520492e-140	0.590089138824168	0.481	0.34	3.41863771770121e-136
SPG21	2.07681812868069e-140	2.15812340600259	0.29	0.189	6.24499211294284e-136
ALG2	2.2366052376444e-140	1.44418833171276	0.26	0.158	6.72547194959671e-136
MICAL3	2.28834601364045e-140	2.22317484486666	0.199	0.107	6.88105646301683e-136
GDE1	2.53842934152154e-140	1.63928762423448	0.269	0.166	7.63305702995528e-136
N4BP1	2.5658270789348e-140	1.37434370467076	0.233	0.135	7.71544202635693e-136
TNKS1BP1	2.87504103811139e-140	1.45029128248806	0.216	0.119	8.64524840160096e-136
FAM120A	3.30679230461659e-140	1.38687441793855	0.37	0.254	9.94352445998209e-136
ATG4B	3.33790311677018e-140	1.2622464178139	0.239	0.137	1.00370746721279e-135
PDP1	4.01544794158806e-140	2.08574276631405	0.176	0.09	1.20744519603553e-135
KISS1	4.66410293634668e-140	1.55762713049918	0.041	0.006	1.40249575295945e-135
TASOR2	4.93984421371672e-140	2.46088988633115	0.073	0.021	1.48541115506462e-135
FAM129B	6.76790749397912e-140	0.69685089405972	0.269	0.164	2.03510978343952e-135
CSNK2A1	1.11253930485585e-139	0.627605835476832	0.364	0.244	3.34540568970155e-135
AQP5	1.17506197534671e-139	3.66396696133256	0.11	0.043	3.53341135986756e-135
HOXA5	1.36146197464107e-139	1.55122184722698	0.068	0.018	4.09391615774569e-135
CGREF1	1.41098792839577e-139	4.42837979726774	0.034	0.004	4.24284070068607e-135
FOXK2	1.51330366038358e-139	1.40263906526747	0.203	0.109	4.55050410677342e-135
PSMB2	2.1108274997401e-139	0.336877235813088	0.419	0.297	6.34725829171847e-135
SERP1	2.54789710442305e-139	0.33812199390859	0.604	0.471	7.6615265930001e-135
TTC32	2.97191580489072e-139	1.47355421947081	0.151	0.071	8.9365508253064e-135
GOLPH3	3.17837699136775e-139	1.83213260040256	0.29	0.187	9.55737961304282e-135
IMP4	3.27734259735845e-139	1.04132968608146	0.28	0.176	9.85496919025685e-135
USP1	5.25558564085923e-139	2.08402689939919	0.253	0.156	1.58035460220637e-134
MAPRE2	5.42089840695451e-139	0.648190198720389	0.093	0.031	1.63006415097122e-134
AP1AR	6.42252417336755e-139	1.94350778762108	0.183	0.095	1.93125301893162e-134
UBXN4	7.2304113269182e-139	0.466222793276737	0.518	0.367	2.1741846860043e-134
CDC16	7.8120413545325e-139	2.2028998900312	0.265	0.165	2.34908083530792e-134
PRXL2A	1.02391303788551e-138	2.15892565828099	0.105	0.04	3.07890650492174e-134
RP9	1.21561567769343e-138	1.21692787120136	0.169	0.083	3.65535634282414e-134
OGFRL1	1.56326109541197e-138	1.18186808929085	0.136	0.059	4.7007261139038e-134
STX11	3.2419138659645e-138	1.2019893860205	0.043	0.007	9.74843499495525e-134
TLK2	3.34898692672222e-138	1.33895776525118	0.207	0.113	1.00704036886537e-133
MAK16	3.55525398994934e-138	1.93771830372905	0.135	0.059	1.06906487477777e-133
AHCYL1	3.84474778431778e-138	0.847861869262337	0.463	0.322	1.15611565874436e-133
S100P	3.90831441647001e-138	1.79695534657253	0.063	0.016	1.17523014503253e-133
SLC2A6	4.22789350133833e-138	2.18611157653148	0.064	0.016	1.27132757585244e-133
TMEM259	5.45433222978302e-138	0.642736718874268	0.355	0.235	1.64011770149575e-133
TOM1L1	6.47534582219037e-138	2.44600146985782	0.266	0.166	1.94713648873264e-133
PSMD3	7.9261427052072e-138	0.579607927244226	0.332	0.222	2.3833911114558e-133
TAPT1	8.03157571423948e-138	2.05175271614616	0.151	0.071	2.41509481727181e-133
CENPN	8.54092797080089e-138	3.22868062054861	0.062	0.015	2.56825704081983e-133
SEH1L	9.53442037244365e-138	1.49405611637398	0.173	0.087	2.8670002059938e-133
EIF4G1	1.3355116767239e-137	0.582772614823515	0.36	0.241	4.01588361190878e-133
CD320	1.95571940544967e-137	1.1879456205917	0.249	0.149	5.88084825218717e-133
SAV1	2.01397581279063e-137	1.4603695871842	0.279	0.176	6.05602526906143e-133
BRD2	2.75655897312212e-137	0.586878443320273	0.46	0.326	8.28897283217821e-133
PLOD1	3.03844503792334e-137	1.92695572643868	0.205	0.115	9.13660422903547e-133
TAF9	3.40165680298582e-137	0.659897293373907	0.345	0.231	1.02287820065784e-132
PRPF19	5.35116908149693e-137	1.45564157952032	0.224	0.128	1.60909654280613e-132
SPCS1	5.47178441534406e-137	0.448841105316722	0.574	0.392	1.64536557369396e-132
PPP3CC	5.79773140524075e-137	1.39741337006209	0.151	0.07	1.74337783355589e-132
ANAPC5	6.2927304211054e-137	1.33574151258003	0.358	0.244	1.89222403762639e-132
SAFB	6.29492823389527e-137	1.35762767504113	0.298	0.192	1.89288491993231e-132
TDG	6.71783914237255e-137	0.668572315226678	0.269	0.166	2.02005423011142e-132
ATP13A3	7.12394755757968e-137	0.209447660849832	0.322	0.201	2.14217103056421e-132
MAP1B	7.5455260643338e-137	0.26641910483331	0.216	0.113	2.26893968754517e-132
PPP4R3B	7.81309716538223e-137	1.89001037851288	0.297	0.195	2.34939831763044e-132
CCT6B	9.07485885856629e-137	2.57034926645399	0.083	0.026	2.72881005877088e-132
BMS1	1.1646224032319e-136	1.29350355038651	0.241	0.142	3.50201956651833e-132
NIPAL1	1.31929186388659e-136	2.08649220740055	0.091	0.031	3.96711063470699e-132
TRBC2	1.47065772571379e-136	3.30118746454075	0.05	0.01	4.42226778122136e-132
KIAA2026	1.71784808136542e-136	1.8150573233507	0.243	0.146	5.1655691806658e-132
ZNF483	1.75223115934034e-136	1.44152017421011	0.075	0.022	5.26895909613641e-132
MCF2L	1.84054143713237e-136	3.2607072449492	0.119	0.05	5.53450810145702e-132
UBE2N	2.0419498542218e-136	0.217481918523521	0.402	0.282	6.14014321164496e-132
VAMP3	2.17534947039702e-136	1.07025604738732	0.284	0.177	6.54127585748384e-132
AL645465.1	2.20309792877276e-136	4.74364108825815	0.027	0.001	6.6247154718197e-132
TGOLN2	2.31159335618572e-136	0.986591964807316	0.412	0.285	6.95096122205047e-132
ATP6V1E1	2.35418521889948e-136	1.01080407454814	0.332	0.222	7.07903495323072e-132
TRAC	3.79812118466781e-136	3.29855089481472	0.048	0.009	1.14209504022961e-131
ANAPC16	3.82564608712676e-136	1.14119768345758	0.478	0.339	1.15037177839902e-131
FAR2	3.97714167320939e-136	2.95695952640107	0.046	0.008	1.19592650113406e-131
FDPS	4.00631069061198e-136	0.494197966040154	0.431	0.293	1.20469762466702e-131
LRRC26	5.11348450134853e-136	4.67073450354908	0.045	0.008	1.5376247895555e-131
PYCR1	5.15894588146911e-136	1.2384270055706	0.187	0.098	1.55129502655776e-131
AGPAT2	5.90079804582936e-136	1.42887982362581	0.343	0.228	1.77436997238089e-131
VPS45	7.30537151565419e-136	2.7822756815677	0.156	0.077	2.19672521475721e-131
CACNB4	7.60795465725854e-136	1.67656785407197	0.062	0.016	2.28771196543764e-131
MYBL2	8.68407388374863e-136	4.42371287351524	0.03	0.002	2.61130101684321e-131
PNO1	1.0518354885012e-135	0.932551812217713	0.205	0.114	3.16286931392311e-131
LRCH1	1.37206645526967e-135	2.18071532511778	0.119	0.049	4.12580383099591e-131
PRKCH	1.54703175427028e-135	1.55237946279626	0.115	0.046	4.65192448509074e-131
FOXQ1	1.81946505198268e-135	1.67848461388675	0.155	0.074	5.47113141131191e-131
DDA1	1.87502232223214e-135	0.481858953859645	0.259	0.156	5.63819212295206e-131
TRAPPC13	1.88518731979137e-135	2.42029528362946	0.131	0.058	5.66875827061263e-131
SFSWAP	2.09182481385169e-135	0.476305590303389	0.258	0.153	6.29011721525204e-131
RFFL	2.13532991885188e-135	2.10984725063717	0.13	0.056	6.42093706598761e-131
NUDT3	2.38646180135736e-135	1.73203540607493	0.277	0.176	7.17609063668159e-131
DNAJC21	4.70660128670766e-135	0.930969424527023	0.337	0.226	1.41527500691299e-130
ASH1L	5.84885018739732e-135	0.847010476905776	0.389	0.268	1.75874925135037e-130
RAF1	6.4636495307495e-135	1.3913544503245	0.264	0.161	1.94361941389637e-130
USF2	6.52054686818686e-135	2.02271959792008	0.279	0.181	1.96072844326379e-130
MTFR1	9.6226546335411e-135	2.62810571142338	0.149	0.072	2.89353224830581e-130
CYLD	1.04387183645456e-134	0.733967169319543	0.221	0.123	3.13892261221885e-130
CLCF1	1.14674168111992e-134	0.957170399582302	0.185	0.095	3.44825223512759e-130
ATP6V1H	1.2173749208343e-134	1.11021229314153	0.283	0.178	3.66064638694873e-130
RIOK1	1.69270752906906e-134	1.31275514756645	0.202	0.111	5.08997153991067e-130
AL365181.4	1.78564883756095e-134	4.05741158276165	0.022	0	5.36944605454577e-130
OSMR	1.80011435663154e-134	0.533591323756515	0.18	0.091	5.41294387039103e-130
LYG1	2.00271686444855e-134	4.88280153199249	0.032	0.003	6.02216961139678e-130
LTF	2.22751873212814e-134	1.43176168057419	0.102	0.037	6.69814882750933e-130
RAB6A	2.96888473814471e-134	1.61622548443784	0.32	0.215	8.92743640760113e-130
TRIP13	4.10375445885058e-134	2.59185514759405	0.072	0.021	1.23399896577637e-129
GBP3	4.18782249462434e-134	1.93970174340185	0.214	0.122	1.25927822413354e-129
PGGHG	4.97675366061945e-134	2.49776970906898	0.239	0.148	1.49650982574827e-129
ZC3H15	6.50283823766901e-134	0.51784949266784	0.435	0.306	1.95540345806707e-129
SLC9A3R1	7.33593842289255e-134	1.77464742558661	0.226	0.13	2.20591668376379e-129
ATP6V0A2	7.3858031484531e-134	2.55412576870611	0.135	0.061	2.22091100673985e-129
RRP1	1.3105873984776e-133	0.995588593130123	0.212	0.12	3.94093630722216e-129
SLC6A8	1.36159224952148e-133	0.331555540818357	0.24	0.132	4.0943078943111e-129
PPP1R14B	1.62595321410951e-133	0.364170447910108	0.513	0.384	4.88924131482731e-129
NPIPB6	2.46749712315008e-133	2.48058409782718	0.03	0.002	7.41976384931229e-129
PTTG1	3.14091635207174e-133	1.02303780595076	0.078	0.024	9.44473547067973e-129
MTHFD2L	3.50176807706091e-133	0.947886034105406	0.252	0.151	1.05298166077222e-128
NHSL2	4.8106519470557e-133	1.20179028982342	0.081	0.025	1.44656304047965e-128
CWC15	6.73640491154756e-133	0.75436012740255	0.393	0.269	2.02563695690235e-128
ASPM	7.69319764376822e-133	3.6059050265761	0.037	0.005	2.3133445314811e-128
ESCO1	1.02681997114377e-132	1.44087595335793	0.232	0.135	3.08764765322933e-128
CPSF6	1.09452478194976e-132	1.21849551723613	0.307	0.202	3.29123601932293e-128
MEIS1	1.17559566821609e-132	0.325842720734398	0.121	0.247	3.53501617432578e-128
FAM91A1	1.418439087752e-132	1.5903113333502	0.206	0.115	4.26524633687026e-128
HIST2H2BE	1.71439041990226e-132	2.5615047001496	0.111	0.044	5.1551719926461e-128
GPR141	2.67151186493694e-132	6.37225395371286	0.023	0.001	8.03323617786537e-128
GOLGA5	2.71278243226073e-132	1.93963930292961	0.207	0.117	8.15733677380803e-128
AP3S2	2.71779054244246e-132	2.77349054621723	0.121	0.052	8.17239616112448e-128
BRI3BP	2.78184069755745e-132	2.59544584033337	0.132	0.059	8.36499497755524e-128
COMMD5	2.97988178759933e-132	1.92924623006621	0.219	0.128	8.96050453531118e-128
AC089983.1	3.10853077536223e-132	4.39343126675314	0.021	0	9.34735204151423e-128
LYRM1	3.28334003243312e-132	1.14235279416768	0.236	0.14	9.8730034775264e-128
ZNF24	3.35282345029646e-132	1.00656222315869	0.311	0.202	1.00819401150414e-127
MUC20	3.85732759817508e-132	3.34018963877148	0.132	0.06	1.15989840877125e-127
AL034417.3	4.35775412230829e-132	0.429198884297727	0.071	0.02	1.3103766645781e-127
MAIP1	5.40590148410922e-132	2.22575157278948	0.17	0.087	1.62555457627164e-127
SMARCA4	6.10023878048757e-132	1.09822736984207	0.337	0.224	1.83434180129261e-127
UBE2G2	6.2181074389959e-132	0.862891242133835	0.296	0.189	1.86978490690607e-127
CDKN2C	6.74020639556906e-132	2.39472007763916	0.072	0.021	2.02678006314762e-127
STAM	7.48531835780406e-132	0.937816587162112	0.171	0.086	2.25083523019168e-127
DUSP16	7.49215962319038e-132	1.80131344402636	0.157	0.077	2.25289239869335e-127
FHDC1	7.54772834412913e-132	3.16173169894895	0.068	0.019	2.26960191307963e-127
GATAD2A	8.42704719856125e-132	1.28722209313248	0.238	0.141	2.53401309260737e-127
NEURL3	8.59222523658486e-132	4.11480540919822	0.032	0.003	2.58368212864107e-127
BSPRY	1.49533384377151e-131	2.19916502449773	0.153	0.074	4.49646886822093e-127
BRD7	1.66489402427792e-131	1.55000402215472	0.348	0.237	5.0063363310037e-127
SLC20A2	1.66991857613149e-131	1.46662752824619	0.179	0.094	5.02144515842739e-127
SYTL2	1.94024195941789e-131	2.91966708562964	0.056	0.013	5.83430757196959e-127
LPAR2	2.00740836441635e-131	2.00974708638591	0.143	0.066	6.03627695179997e-127
KTI12	2.3306408240975e-131	1.18363945311905	0.121	0.051	7.00823695806119e-127
SNRPD1	2.43095463079001e-131	0.35747174169056	0.436	0.323	7.30988057478555e-127
CHERP	2.5069150797331e-131	1.34672056164627	0.186	0.099	7.53829364475742e-127
RRP15	2.66254578320191e-131	1.15443595931037	0.24	0.143	8.00627517008816e-127
RCC2	3.24575656200584e-131	1.57246373621986	0.252	0.153	9.75998998195157e-127
AC025263.1	4.23528130014553e-131	3.30834351460617	0.037	0.005	1.27354908695376e-126
SMIM19	4.31452013203754e-131	1.22535166317974	0.346	0.233	1.29737620370369e-126
MTA1	4.4996376497736e-131	1.52713	0.255	0.157	1.35304104128692e-126
GALNT14	4.69394593228742e-131	3.14873371566033	0.039	0.006	1.41146954183883e-126
PAK1IP1	6.10081505484564e-131	1.73743227193643	0.218	0.126	1.83451508699208e-126
DPP8	7.77600232185055e-131	1.66403846667213	0.197	0.108	2.33824389818046e-126
ERCC1	7.98053199743813e-131	0.774802169552626	0.318	0.208	2.39974597162964e-126
SSU72	9.27792780027553e-131	0.385060344737369	0.444	0.317	2.78987288954285e-126
AC104695.3	9.83533651692861e-131	1.94872824890003	0.044	0.008	2.95748569064043e-126
TALDO1	1.00729179402635e-130	0.550654649892127	0.462	0.333	3.02892642463725e-126
CCNE2	1.17232189365188e-130	4.10688247919246	0.038	0.006	3.52517193421122e-126
RUBCNL	1.17264245840396e-130	0.288873380038209	0.07	0.02	3.52613587242071e-126
NAP1L4	1.25200337703609e-130	0.972724598941569	0.36	0.244	3.76477415474753e-126
FAM204A	1.56226599574083e-130	0.530855133638788	0.353	0.241	4.69773384919267e-126
CCDC50	1.78516572897177e-130	0.728491679017039	0.336	0.224	5.36799334701811e-126
ELOVL7	1.89753284828395e-130	1.69501889258029	0.099	0.037	5.70588127478983e-126
MED13	2.54289053762422e-130	0.813109030926766	0.301	0.191	7.64647184663603e-126
[truncated: 6,405 more rows]

## Sheet: fib_high_sig
TableS6:3974 markedly elevated genes in tumor-associated fibroblasts
gene	p_val	avg_log2FC	pct.1	pct.2	p_val_adj
RXFP2	0	11.2374063721502	0.039	0	0
IGHG1	0	10.7205041458257	0.079	0.001	0
DLK1	0	8.70571284652842	0.077	0.001	0
ZFR2	0	8.56099343478405	0.035	0	0
IGKC	0	7.94098175220918	0.094	0.007	0
HMGA2	0	6.65261905229164	0.056	0.003	0
VEGFD	0	6.64162732650331	0.046	0.002	0
MTRNR2L1	0	6.33290701981084	0.17	0.005	0
PLCG2	0	6.0317037896507	0.422	0.024	0
CCL11	0	5.7020555047854	0.037	0.001	0
DPEP1	0	5.70204026367078	0.079	0.002	0
CLIC5	0	5.28259553573517	0.057	0.001	0
MTRNR2L10	0	5.05709977503085	0.05	0.002	0
MTRNR2L12	0	4.98596795976304	0.711	0.069	0
KCNN3	0	4.90801283999029	0.085	0.006	0
SCN7A	0	4.38099352614283	0.105	0.008	0
MTRNR2L8	0	4.34606444546395	0.578	0.047	0
C7	0	4.11065360896874	0.16	0.024	0
CXCL14	0	3.77734038438807	0.437	0.143	0
MATN2	0	3.72287168214122	0.226	0.061	0
FRZB	0	3.09938085968391	0.33	0.048	0
MSC	0	3.05688181324626	0.129	0.019	0
LTBP3	0	2.96050589677931	0.383	0.156	0
C6orf48	0	2.89018403063278	0.489	0.191	0
IGFBP7	0	2.83469461975802	0.798	0.722	0
CREG1	0	2.7565631442999	0.219	0.057	0
PGF	0	2.75426603919215	0.242	0.048	0
GSN	0	2.65288540246174	0.708	0.478	0
ASPN	0	2.64801355408094	0.345	0.068	0
TMEM176B	0	2.29018846580037	0.322	0.114	0
WFDC1	0	2.21762018867823	0.208	0.047	0
HOPX	0	2.19035940433595	0.185	0.04	0
CD9	0	2.17048377027391	0.283	0.072	0
BGN	0	1.99089464742027	0.507	0.253	0
TIMP1	0	1.86991280465923	0.791	0.761	0
SEPT7	0	1.83423682236337	0.521	0.234	0
MT-ND4L	0	1.27209453578386	0.866	0.741	0
CACNA1A	3.75388363119759e-301	3.33863095104281	0.117	0.018	1.12879280790111e-296
COL16A1	1.18342928664108e-294	3.16434477655714	0.279	0.092	3.55857186492974e-290
FABP4	8.07881979982973e-291	4.74105923036359	0.067	0.006	2.4293011138088e-286
MXRA7	1.76831090741552e-290	1.9739398550726	0.516	0.269	5.31731089859848e-286
COL6A2	8.53803199622445e-281	1.71702650898279	0.849	0.777	2.56738622126469e-276
MOBP	1.24586451838837e-280	6.6447384427922	0.03	0.001	3.74631460679382e-276
PTGIS	8.72193525652705e-280	4.53358105864786	0.107	0.017	2.62268593163768e-275
KRT17	2.13741867221613e-275	1.62810450876023	0.218	0.06	6.42721794735392e-271
DKK3	1.59838856994508e-274	1.84198278889283	0.307	0.109	4.80635442982486e-270
RARRES3	7.66107256957671e-269	2.61692190492782	0.153	0.034	2.30368452167172e-264
VIM	1.48546434680451e-268	0.815572930496463	0.935	0.976	4.46679129084118e-264
CYGB	5.18868159121542e-265	2.2370408529988	0.17	0.04	1.56023655447848e-260
MYOC	2.2523023793547e-261	4.94206837156307	0.036	0.001	6.77267325471959e-257
ALOX15B	7.6906799630427e-258	6.80719681557337	0.026	0	2.31258746488694e-253
CTSF	1.80771432119425e-256	2.18006146880951	0.326	0.129	5.43579696383112e-252
RIC3	6.88416479680433e-249	3.82856076797324	0.08	0.01	2.07006835439906e-244
ARL4C	3.03466118726231e-247	2.72991444473615	0.194	0.055	9.12522619009778e-243
EHBP1L1	7.72710506402034e-244	4.75757658972967	0.166	0.044	2.32354049275092e-239
CCDC80	1.4843511605563e-241	1.85394190519332	0.536	0.311	4.46344393979278e-237
PPFIBP1	3.76603227184468e-240	2.51916622629886	0.213	0.065	1.1324459041437e-235
MSX1	5.58856259781248e-240	2.45530433091229	0.21	0.064	1.68048077316221e-235
AL133163.2	1.17193543062721e-239	5.30551677885215	0.034	0.001	3.52400983989601e-235
CDC42EP5	2.85855987109052e-239	2.31819819759903	0.236	0.079	8.59568953236921e-235
POU2F3	1.43947235655068e-237	4.1608269588528	0.045	0.003	4.3284933761479e-233
MGP	7.25455413357825e-237	1.33136009848159	0.76	0.701	2.18144442796698e-232
BHLHE22	3.61815650054412e-229	3.89667509391528	0.032	0.001	1.08797965971362e-224
CLDN1	1.03656560398399e-227	3.26736114971473	0.055	0.005	3.11695277117984e-223
AC100810.3	7.68281020261345e-226	5.04563659865217	0.028	0.001	2.31022102792586e-221
LBH	2.41832497919412e-218	1.29045619489632	0.262	0.094	7.27190321243671e-214
EVC	9.26316154174225e-218	4.72237270479171	0.072	0.01	2.78543267560189e-213
COL11A1	1.66337641595247e-215	3.53998863468405	0.038	0.002	5.00177288276908e-211
ITGA11	2.27746383546605e-211	3.43926538856547	0.093	0.016	6.84833375324642e-207
CD74	2.13014961033084e-209	3.39773759446883	0.16	0.044	6.40535987826483e-205
OVOL1-AS1	2.73099968966307e-207	8.71981975360278	0.018	0	8.21211606681685e-203
OR5AU1	1.15037589402119e-203	4.93189758040242	0.034	0.002	3.45918031332173e-199
MTRNR2L6	1.33334138150794e-203	6.2980687110154	0.022	0	4.00935753419436e-199
AEBP1	1.35873457675655e-203	1.86442065427525	0.603	0.428	4.08571487230694e-199
SOD3	1.73229583739306e-203	1.75997423595617	0.399	0.21	5.20901358304094e-199
SMOC2	3.49208147205012e-203	2.50591843555044	0.299	0.129	1.05006889864547e-198
RFLNB	4.32446059526078e-201	3.07037416554775	0.083	0.014	1.30036530099492e-196
C9orf3	6.72114196069709e-200	1.50210058208148	0.339	0.155	2.02104738758161e-195
BST2	8.18368989424104e-199	1.79881868707325	0.19	0.06	2.46083555119828e-194
GBP4	8.89668125715826e-197	2.69106437458666	0.119	0.027	2.67523205402749e-192
PAPPA2	2.58588342560521e-195	7.3281382535313	0.021	0	7.77575146079485e-191
KIF1A	4.03846072719565e-195	6.5972408127122	0.026	0.001	1.21436514066773e-190
AP000911.1	6.71312714990375e-195	3.4455957563695	0.061	0.008	2.01863733397606e-190
CXCL12	1.19750301642371e-193	2.82036893003567	0.435	0.252	3.6008915703861e-189
TNFSF10	1.15149938849469e-192	3.04913226820684	0.128	0.032	3.46255866120354e-188
FMO1	2.05391104617807e-191	3.62342278726367	0.043	0.004	6.17611051585745e-187
POSTN	1.91443455683882e-188	2.11275391482238	0.189	0.061	5.75670471241433e-184
TMEM176A	3.04352909662247e-188	1.82933127801989	0.277	0.116	9.15189199354375e-184
LHFPL4	3.90692433687233e-188	4.79946124996447	0.028	0.001	1.17481214809751e-183
A2M	5.2034907766323e-188	1.91633867377325	0.34	0.161	1.56468967653333e-183
LTBP2	9.06211295842363e-185	3.61091533771287	0.199	0.07	2.72497736659799e-180
C16orf45	1.00125720940407e-184	1.89620032270884	0.18	0.058	3.01078042867803e-180
LINC02452	3.60099167986275e-183	7.49343868019278	0.016	0	1.08281819813473e-178
FGL2	7.77806927032823e-183	4.39671072432056	0.054	0.006	2.3388654295877e-178
GDA	8.77336390387473e-182	6.19736289455676	0.028	0.001	2.63815052589513e-177
NPDC1	1.57474675453471e-181	2.05881459430703	0.293	0.13	4.73526349088588e-177
MTRNR2L3	2.09471152024609e-181	6.79682990227206	0.02	0	6.29879754137999e-177
CFH	8.52946096509691e-181	2.13938755490615	0.135	0.036	2.56480891220464e-176
LINC02154	1.77559716258441e-180	6.50172022706294	0.019	0	5.33922066789133e-176
CD47	2.52328445481343e-180	2.57868413411568	0.197	0.068	7.58751635562397e-176
LMO7-AS1	5.58301739679407e-177	2.97595019542536	0.043	0.004	1.67881333121598e-172
BMP7	2.24642880046767e-176	1.88518237849286	0.141	0.039	6.7550114030063e-172
ADAMTSL3	3.25797664250568e-176	4.68776083442372	0.058	0.008	9.79673576401457e-172
ENPP5	1.92107219572474e-174	4.47842505572153	0.03	0.002	5.77666409254429e-170
ARHGAP10	2.21031287474259e-174	1.93754538328416	0.283	0.126	6.64641081435097e-170
FXYD6	3.08808455005964e-174	3.44027476656801	0.267	0.12	9.28587024202934e-170
NENF	3.64395495816751e-173	1.4958405888738	0.479	0.295	1.09573725592097e-168
PDGFD	1.09423148834715e-172	2.3417872307327	0.116	0.028	3.29035408545988e-168
COL1A1	1.4871069317756e-172	0.164379430725488	0.723	0.944	4.47173054384922e-168
RAI14	3.01617860495964e-172	1.51469763704271	0.36	0.186	9.06964906511363e-168
SULF1	5.97604357724831e-172	2.20007926303118	0.193	0.067	1.79699630367857e-167
SGCE	7.97008434961759e-172	1.88476335481175	0.236	0.094	2.39660436393001e-167
G0S2	1.43273912910375e-171	2.50029535077388	0.132	0.036	4.30824656121497e-167
PTGDS	3.16563839447627e-171	1.49794846354734	0.713	0.643	9.51907465219014e-167
SHB	6.03938637567598e-171	2.86914070058545	0.07	0.011	1.81604348316577e-166
SEPT2	3.04445934602004e-170	1.20022913493128	0.377	0.192	9.15468925348227e-166
RARRES2	4.06578348503761e-168	1.82894766300989	0.611	0.515	1.22258109395081e-163
SPINT2	1.32761370242905e-166	3.04561999301475	0.112	0.028	3.99213440320415e-162
PAM	2.85107744959999e-166	2.35035516345192	0.339	0.173	8.57318989094717e-162
PHLDA3	8.52270174327073e-166	2.06931064066779	0.201	0.074	2.56277641420151e-161
PEBP4	3.59475699705799e-165	5.02954172109497	0.03	0.002	1.08094342901534e-160
CPED1	2.05210968692206e-164	2.10504853313755	0.304	0.145	6.17069382857462e-160
LINC02177	1.1227483456322e-162	6.39636644269796	0.016	0	3.37610427531603e-158
DNAH12	2.68187655661326e-162	5.00628650750215	0.024	0.001	8.06440280573608e-158
GRIN2B	6.92852430809368e-161	5.48484557029457	0.019	0	2.08340725944377e-156
ENC1	2.96507699554637e-160	2.00978939869647	0.179	0.061	8.91598652560794e-156
C8orf59	5.41586611801455e-160	1.29265342187132	0.34	0.17	1.62855094168697e-155
AC068491.3	3.94525684786687e-159	2.65829306679672	0.076	0.014	1.18633873415357e-154
KRT18	1.32630362544085e-157	2.15049880441041	0.125	0.034	3.98819500170065e-153
POU2F2	1.33781860033522e-157	3.04511249898437	0.061	0.009	4.022820531208e-153
RASGRF2	2.35340929701154e-157	5.62568196626152	0.03	0.002	7.0767017561137e-153
AL590434.1	7.44226447630903e-157	4.76938307464946	0.022	0.001	2.23788892802613e-152
HSD17B2	9.24476511238475e-157	5.78277697099516	0.023	0.001	2.77990086929409e-152
COLEC12	1.50595870184588e-156	3.12768477360548	0.117	0.031	4.52841781645056e-152
PTAFR	8.51883545399651e-156	5.48396286202042	0.019	0.001	2.56161382101675e-151
NFE2L3	1.04501513339596e-155	3.24542460223574	0.043	0.005	3.14236050612166e-151
VEGFB	6.01201968109636e-155	1.89967063394026	0.353	0.19	1.80781431810567e-150
THSD7B	1.98088641977155e-153	3.89122648712962	0.026	0.001	5.95652546425304e-149
SLITRK3	2.13579393210853e-153	6.33480146028331	0.02	0.001	6.42233235385035e-149
AC079354.3	8.78996251712869e-153	5.37992997658369	0.02	0.001	2.6431417289006e-148
DAPK2	3.5093565508228e-151	3.08217754902177	0.056	0.008	1.05526351483242e-146
ENPP4	1.62858186889482e-150	4.0457720949536	0.034	0.003	4.89714567976672e-146
DLG2	3.76659863772463e-150	3.41364953215462	0.066	0.012	1.1326162103638e-145
AC067735.1	5.34722900604171e-150	5.01349591627077	0.02	0.001	1.60791176211674e-145
ITM2B	5.39647024149815e-149	1.75474035538192	0.784	0.893	1.62271860161849e-144
SERPINF1	6.4641531945743e-149	1.09311209323803	0.758	0.704	1.94377086560849e-144
DOCK5	4.21939295455e-148	2.85679936351212	0.114	0.031	1.26877146143318e-143
KLK6	4.9496947142945e-148	2.28648773299782	0.087	0.019	1.48837320058836e-143
CRX	3.504942642409e-146	6.25438522676404	0.016	0	1.05393625257239e-141
C9	1.13520431753388e-145	4.40938946042276	0.024	0.001	3.41355938282439e-141
AL356417.3	1.21263200983891e-145	8.41793781994232	0.013	0	3.64638445358562e-141
CTSS	5.13789523190112e-145	2.57664556013095	0.109	0.029	1.54496509623267e-140
CCDC190	1.31032570850285e-143	4.72946019950418	0.023	0.001	3.94014940546807e-139
CYS1	3.65797476361684e-143	3.04762198484933	0.078	0.016	1.09995301141958e-138
DGKB	4.80839132880387e-142	5.07498393795689	0.05	0.007	1.44588327257132e-137
MEST	1.1887381388877e-141	2.51486594425746	0.167	0.06	3.57453558363531e-137
PDLIM5	2.27948913953881e-141	1.50333442860172	0.166	0.057	6.85442384259321e-137
TRABD2A	2.62339909537947e-141	3.70415303879948	0.027	0.002	7.88856107980608e-137
TRAC	4.95876924505456e-141	4.42347969738663	0.035	0.003	1.49110191198791e-136
ITIH3	2.45174215616899e-140	2.17483491796956	0.032	0.003	7.37238866360014e-136
GLT8D2	7.56394288852563e-140	2.29768475250266	0.186	0.071	2.27447762657966e-135
CXCL1	2.12106361650541e-139	3.49179811292506	0.152	0.053	6.37803829483177e-135
CST2	6.18883228096452e-139	3.85248556677388	0.028	0.002	1.86098186688603e-134
CHRNA1	9.85466018310683e-139	8.00103760488019	0.012	0	2.96329631706022e-134
RGMA	2.17872014510178e-138	3.65682169044212	0.153	0.054	6.55141147632104e-134
CDH17	4.19558556857555e-138	7.65354655563192	0.014	0	1.26161258047067e-133
FAM198B	7.46382246214645e-138	1.91092879294175	0.149	0.051	2.24437141436744e-133
TROVE2	1.79912773998901e-137	1.6393960712371	0.221	0.095	5.40997711414696e-133
EMP2	1.86962132711956e-137	1.39435731586137	0.307	0.155	5.62195133064852e-133
ITM2A	1.71070601142339e-136	2.07648446237658	0.171	0.062	5.14409297635012e-132
RAB12	3.48135663015155e-136	3.09048519223932	0.113	0.033	1.04684393868657e-131
GGT5	2.33952246726286e-135	1.41474248616262	0.181	0.068	7.03494405905942e-131
IGFN1	8.53263803863219e-135	2.35915521238273	0.066	0.012	2.5657642582167e-130
MMP9	5.19849304794833e-134	5.28587900130695	0.02	0.001	1.56318685951806e-129
KCNA7	6.05176487884877e-134	5.01116022675488	0.019	0.001	1.81976569906982e-129
GDF15	6.25703963149315e-134	2.28575369141942	0.167	0.062	1.88149181718999e-129
NDRG2	8.13431854499191e-134	2.10084364714977	0.229	0.101	2.44598958647907e-129
RAC1	1.33154635460186e-133	0.88651268947576	0.653	0.555	4.00395988828779e-129
COL8A1	2.89404599815222e-133	2.43117857285251	0.08	0.018	8.70239631644371e-129
DHDH	1.10238184342399e-132	5.08916700733678	0.018	0.001	3.31486220317595e-128
KCNJ6	4.89082061976628e-132	5.24862381193886	0.015	0	1.47066976036372e-127
PGA3	2.23243950973807e-131	6.05510639920552	0.014	0	6.71294560578237e-127
SMIM3	4.61267452946771e-131	2.02292407479166	0.15	0.052	1.38703123101094e-126
TF	5.32669853385687e-131	3.98033250835831	0.029	0.002	1.60173824913076e-126
PRELP	1.21594020879368e-130	2.18120486678617	0.115	0.034	3.6563322078426e-126
NBL1	2.15819472869479e-130	1.09272717913318	0.592	0.444	6.48969154918524e-126
CTGF	4.6060217446765e-130	1.4856971333944	0.348	0.19	1.38503073862422e-125
SVIP	5.68566495821202e-130	2.42143712953566	0.098	0.026	1.70967945293435e-125
NLRP1	1.36037890105273e-129	1.94918971460742	0.174	0.068	4.09065935546557e-125
CLU	3.24888829958094e-129	1.91606430978309	0.326	0.176	9.76940711683988e-125
HHIP	8.25813024595058e-129	1.72686427214588	0.117	0.035	2.48321976495734e-124
PLA1A	3.43744015306951e-128	4.7394433446358	0.016	0.001	1.033638254028e-123
ACBD3	3.80853808913464e-128	1.51529487798871	0.331	0.183	1.14522740340279e-123
SLIT2	4.69354870515709e-128	2.6927891202093	0.125	0.04	1.41135009564074e-123
NEDD4L	1.9777543819644e-127	3.03189516960225	0.057	0.01	5.94710742656695e-123
HSPA4L	2.36718081019114e-127	2.9400132063962	0.056	0.01	7.11811269624476e-123
KIAA1324	4.17280312223172e-127	5.1268602853611	0.046	0.007	1.25476189885508e-122
DNAH2	1.15045109367678e-126	4.81901848055334	0.02	0.001	3.45940643868607e-122
BRI3	3.89477014678458e-126	1.45302145586584	0.471	0.325	1.17115738313812e-121
PTGFR	2.10319273650804e-125	3.21939477308755	0.055	0.01	6.32430055867966e-121
ADAMTSL2	5.26563156919001e-125	4.38779046975931	0.03	0.003	1.58337541285543e-120
AC004130.1	5.31234755072541e-125	3.69861600083903	0.046	0.007	1.59742290850313e-120
AC005837.1	7.0180787328851e-125	3.08228524288059	0.035	0.004	2.11033627497855e-120
ABCA10	8.35123617975262e-125	3.50159541156735	0.054	0.009	2.51121671925161e-120
TXLNB	6.10568135186148e-124	4.27302220560688	0.025	0.002	1.83597838250475e-119
LTBP4	4.30609885559124e-123	1.78628038831039	0.555	0.421	1.29484392587629e-118
CSF3	6.30933744183161e-123	2.90633780073876	0.059	0.011	1.89721776875876e-118
NKAIN4	4.52094361950885e-122	3.3369167682739	0.05	0.008	1.35944774638631e-117
CELF5	1.56645910193272e-121	4.74602158007045	0.016	0.001	4.71034251951169e-117
NACA2	2.47229350868452e-121	3.63149344537609	0.027	0.002	7.43418658061435e-117
PIGR	1.02291429972662e-120	5.56318250288702	0.051	0.009	3.07590329927795e-116
BCL2L2	1.21525379360391e-120	3.84159082200958	0.105	0.031	3.65426815736697e-116
RNFT1-DT	4.74929352454779e-120	4.00223247956391	0.02	0.001	1.42811256283152e-115
CXCL9	7.53373570088224e-120	6.49273188574601	0.013	0	2.26539432525529e-115
CD40	9.78676834183111e-120	2.19452381809747	0.09	0.024	2.94288124038861e-115
IGSF9B	1.82336021633277e-119	5.33394078679936	0.025	0.002	5.48284417051265e-115
MAST4	6.83441510438094e-119	3.13862240388776	0.081	0.02	2.05510862188735e-114
SCARF2	6.90904583160189e-119	4.13521036171873	0.06	0.012	2.07755008156269e-114
CSRP2	8.72189154140197e-119	1.11068	0.253	0.12	2.62267278649957e-114
TGFB1	1.22777488863149e-118	1.65648074920053	0.228	0.106	3.6919190901149e-114
SGSM1	2.99466331810623e-118	3.91003984866081	0.018	0.001	9.00495259754542e-114
ATP1B1	4.1709643660309e-118	2.95819553555341	0.106	0.032	1.25420898486549e-113
HIST1H1C	6.18337054621484e-118	2.67111173397949	0.185	0.078	1.8593395232468e-113
IL3RA	1.36309547855593e-117	3.3216754394728	0.034	0.004	4.09882810401767e-113
TAC3	1.44807846489499e-117	5.79175680295528	0.016	0.001	4.35437194393924e-113
TCF21	4.45274536745235e-117	2.6537205859889	0.055	0.01	1.33894053199292e-112
HEXB	5.45136907584136e-117	1.81315466639448	0.266	0.134	1.6392266811055e-112
TSPAN8	1.16715051894492e-116	3.42812523522317	0.034	0.004	3.50962161046738e-112
AL355922.2	1.36139535260777e-116	6.09769728265308	0.013	0	4.09371582529156e-112
AL357060.1	4.74758308803454e-116	3.46962382975023	0.038	0.005	1.42759823457199e-111
DUSP6	5.33706981965011e-116	2.18163160372283	0.112	0.035	1.60485689476879e-111
AC007388.1	1.36010378014269e-115	2.62557170155245	0.07	0.016	4.08983206688907e-111
AC108718.1	4.04722553804142e-115	3.5808245543847	0.028	0.003	1.21700071928906e-110
KIAA1257	5.12624770967263e-115	3.09617761396491	0.033	0.004	1.54146268629856e-110
MYOZ3	7.73251691030039e-115	3.56562410529186	0.033	0.004	2.32516783492733e-110
CRYBA4	8.20806624253304e-115	7.74890677506578	0.01	0	2.46816551912968e-110
FGF1	1.21763829399613e-114	2.6375684110274	0.046	0.007	3.66143835004635e-110
ZNF341-AS1	1.24328079170922e-114	4.84005402336875	0.014	0	3.73854534066962e-110
FAM96B	4.00237570223777e-114	1.20141265789458	0.314	0.173	1.2035143736629e-109
CSF1	1.94870043172833e-113	1.63896058143852	0.142	0.051	5.85974219820708e-109
COL4A3	2.5978059964222e-113	5.0164592922941	0.025	0.002	7.81160263124154e-109
MOXD1	3.1988364307803e-113	1.41419348011061	0.308	0.165	9.61890114735636e-109
IL34	5.61817182952027e-113	3.04441725468433	0.067	0.015	1.68938426913674e-108
SPRY2	6.33277125631218e-113	2.84579674658506	0.187	0.082	1.90426431677307e-108
LRIG1	7.14039546932702e-113	3.06531654493955	0.14	0.052	2.14711691762664e-108
AC009414.2	2.45082387489277e-112	3.16987754285777	0.04	0.006	7.36962739180255e-108
AC112715.1	1.77574293636416e-111	3.66326892475509	0.019	0.001	5.33965900964703e-107
LINC01588	1.78242367309177e-111	2.24490872376243	0.092	0.026	5.35974798498695e-107
HS3ST2	2.40260566215587e-111	4.64532905106904	0.015	0.001	7.22463522610269e-107
AL606970.3	2.41583192072534e-111	8.25496232615335	0.01	0	7.26440658562111e-107
KIAA1755	2.47435406804849e-111	3.69997153197599	0.084	0.023	7.44038268262182e-107
SLC13A5	6.90764504740235e-111	6.09288586030575	0.013	0	2.07712886575389e-106
AC097376.2	9.66090330116815e-111	2.31989408737853	0.105	0.033	2.90503362266126e-106
GPC3	1.73159333666111e-110	2.01523907137859	0.051	0.009	5.20690116333996e-106
HMCN2	3.37131713648871e-110	3.35811134223975	0.035	0.004	1.01375506294216e-105
HOTAIRM1	1.14602312163343e-109	1.63825895351831	0.125	0.043	3.44609152675171e-105
SEPT9	1.19014213351635e-109	1.72226132344923	0.158	0.063	3.57875739548367e-105
AC108463.3	1.38281119236388e-109	2.43529315046757	0.057	0.011	4.15811325543818e-105
CD200	5.54014068132423e-109	3.01840385401673	0.044	0.007	1.6659203028742e-104
LDHC	6.0284447504508e-109	4.24002583037054	0.02	0.001	1.81275333646056e-104
ERICH4	7.77474062421859e-109	6.11642724241066	0.013	0	2.33786450570253e-104
SSFA2	8.14627704074911e-109	1.78173334648352	0.162	0.066	2.44958550615326e-104
MTSS1	1.26727966680665e-108	3.04062534817399	0.03	0.003	3.81070995808759e-104
C19orf66	1.63053186319759e-108	1.80394	0.146	0.056	4.90300931263514e-104
STMN2	2.00539478293419e-108	1.83077681206933	0.069	0.016	6.0302221122831e-104
COL4A4	2.2563425982598e-108	3.26905248179673	0.052	0.01	6.7848221929672e-104
TNIP1	1.04861112529049e-107	1.99884891223223	0.186	0.082	3.1531736537485e-103
ITM2C	1.39662377625153e-107	2.1940845796297	0.326	0.192	4.19964769518835e-103
FXYD2	2.24353750532126e-107	4.99563199593563	0.03	0.003	6.74631727850103e-103
CXCL6	2.50956482156247e-107	3.67166325849289	0.017	0.001	7.54626141843834e-103
SLC16A10	2.56616221440875e-107	5.1239476395416	0.014	0.001	7.71644977872712e-103
BOC	3.04915268427178e-107	3.49185375079128	0.115	0.039	9.16880212160525e-103
NAV2	6.59571578088839e-107	2.22985545871838	0.063	0.014	1.98333173531314e-102
MYO15A	9.35286494947747e-107	4.39011341300177	0.029	0.003	2.81240649030787e-102
EFCC1	1.53298408349625e-106	3.44657929398925	0.035	0.005	4.60968313907323e-102
TMEM114	3.32542717874467e-106	6.34788996122961	0.011	0	9.99955952648521e-102
FOXS1	4.50653964048731e-106	1.73397311111168	0.089	0.025	1.35511646989453e-101
NCBP2-AS2	5.74474585796294e-106	1.97680116624343	0.109	0.036	1.72744507948946e-101
PTPRS	7.30853970915165e-106	3.90017579328682	0.092	0.028	2.1976778905419e-101
TP63	1.51151481381354e-105	5.92150390485225	0.015	0.001	4.5451250451373e-101
GJB2	2.75963282898993e-105	3.40286030786583	0.024	0.002	8.29821591677271e-101
AMPD3	8.43817212488974e-105	2.71559798508919	0.066	0.015	2.53735835795434e-100
CTHRC1	1.4384500579865e-104	1.65502202943659	0.176	0.075	4.32541932436541e-100
AL645465.1	2.155460224898e-104	5.48184629924792	0.014	0.001	6.48146889626828e-100
NRP2	3.28737698924014e-104	1.66951352974617	0.161	0.065	9.8851426066451e-100
SYDE2	5.16439521450872e-104	3.25193865023682	0.076	0.02	1.55293364100277e-99
BIRC3	6.48069702182534e-104	1.9438924760865	0.086	0.024	1.94874559446288e-99
CPVL	8.73286038954618e-104	3.35606058735329	0.071	0.018	2.62597111913654e-99
ITGBL1	1.4390995873547e-103	2.6688415029712	0.064	0.015	4.32737245917557e-99
LAMP1	3.93428268455922e-103	1.90951108149314	0.407	0.276	1.18303880324696e-98
PDGFRA	7.14043054467442e-103	0.146931125909166	0.297	0.527	2.1471274647836e-98
STX3	9.06576978862443e-103	2.10577708846175	0.161	0.067	2.72607697543937e-98
TMEM106C	2.00438552988519e-102	2.64555358742161	0.109	0.036	6.02718728836476e-98
FAM84A	2.64193061198092e-102	3.31150514337405	0.041	0.007	7.94428535022663e-98
MTRNR2L11	2.64811038781832e-102	7.33419534200708	0.01	0	7.96286793616968e-98
AC139100.1	5.41680668770154e-102	4.78123257610732	0.013	0	1.62883377099185e-97
GRM8	5.49554858378386e-102	5.1110247700333	0.013	0	1.65251145914381e-97
SOX8	6.99012241848005e-102	2.96085211868582	0.04	0.006	2.10192981123695e-97
NOP53	8.37946112339925e-102	0.865345208490855	0.626	0.532	2.51970395980616e-97
AC145207.6	9.42712413330156e-102	4.48698852849307	0.013	0	2.83473622688378e-97
RAB30-AS1	9.45029025042535e-102	2.02763380330379	0.12	0.043	2.8417022783029e-97
FJX1	1.15150109688527e-101	1.20409567681739	0.256	0.13	3.46256379833401e-97
GLRX5	1.31393665757129e-101	1.68673225109272	0.28	0.159	3.95100752931687e-97
KDELC2	1.96896576978331e-101	1.91348044231489	0.112	0.038	5.92068006973841e-97
AP001189.5	1.01496827196214e-100	4.99890033952178	0.013	0	3.05200959379017e-96
MYL10	3.35684325531304e-100	3.9045566241806	0.017	0.001	1.00940276687263e-95
TFF3	3.4785239278957e-100	5.64427390107921	0.066	0.016	1.04599214511824e-95
TM7SF3	3.84054580516458e-100	3.10001710760722	0.101	0.033	1.15485212361299e-95
CCN2	3.99812174042416e-100	0.236125131295513	0.045	0.199	1.20223520734555e-95
SCN11A	6.51197422974612e-100	4.04971333108555	0.022	0.002	1.95815065088466e-95
SCUBE2	1.91482198022062e-99	2.2337670215457	0.126	0.046	5.7578696945234e-95
NUP210L	1.94411989357448e-99	5.63985983732298	0.011	0	5.84596851997846e-95
TNNT2	2.08227807611596e-99	4.2893235406244	0.018	0.001	6.26141017488068e-95
CRABP1	2.11377814009305e-99	5.19908042834221	0.012	0	6.3561308672598e-95
ARHGAP26	2.32298470050547e-99	3.1529723138365	0.063	0.015	6.98521499441994e-95
CLEC11A	1.12224570008891e-98	0.935469267836191	0.412	0.263	3.37459282016735e-94
CSGALNACT1	1.46002080729207e-98	2.61863105546957	0.03	0.004	4.39028256752725e-94
AC078864.2	3.9036264957264e-98	4.83310977995532	0.013	0	1.17382048726493e-93
PLK5	6.17844630729078e-98	2.83737972399847	0.051	0.01	1.85785880460234e-93
BTC	2.12768621209256e-97	2.87440962574643	0.029	0.003	6.39795243976232e-93
SEL1L3	2.13909216541148e-97	5.6938586647143	0.024	0.002	6.43225014139233e-93
HSP90AA1	3.70518140649349e-97	0.217225622491756	0.742	0.953	1.11414804893259e-92
TMPRSS2	3.94988652333561e-97	5.74694955898061	0.011	0	1.18773087756702e-92
CAPN6	4.16958707333457e-97	4.78853297875434	0.023	0.002	1.25379483295171e-92
CTSZ	1.07925088297421e-96	1.86683093652013	0.261	0.144	3.24530740510345e-92
LINC01783	5.53299415169109e-96	4.17891037790765	0.015	0.001	1.66377134141351e-91
MX1	1.17653197210615e-95	2.00261	0.088	0.026	3.53783164012319e-91
DNAH17	1.51187373902639e-95	5.03734	0.014	0.001	4.54620433325237e-91
RBP5	3.54685904959399e-95	3.02812544850366	0.035	0.005	1.06654051621291e-90
CIRBP	4.86713994291926e-95	0.842193884805358	0.818	0.782	1.46354898083582e-90
RAB33A	1.32453330346059e-94	2.25056258498253	0.05	0.01	3.982871643506e-90
CFAP58	3.2301719192798e-94	2.88107085821087	0.027	0.003	9.71312696127437e-90
IRF5	5.27798543862649e-94	5.46368695897167	0.011	0	1.58709022139499e-89
IRX2	9.7333918261331e-94	3.25588822489664	0.024	0.002	2.92683092211822e-89
SLCO2B1	1.53370380407403e-93	4.84051910234528	0.016	0.001	4.6118473388506e-89
SCN1B	3.84335353640105e-93	2.70524554606594	0.058	0.013	1.1556964083958e-88
GIPC2	5.00029254676331e-93	3.23398588353213	0.02	0.002	1.50358796881173e-88
ZNF57	1.10920719982262e-92	2.34766240386725	0.043	0.008	3.33538604986663e-88
SSPN	1.64078787812065e-92	1.03881887794974	0.354	0.212	4.93384914950879e-88
PTP4A1	1.66600887129252e-92	1.48303934381295	0.188	0.089	5.00968867597662e-88
KIF25-AS1	4.22299451360491e-92	4.45374611362431	0.015	0.001	1.269854450241e-87
SLC5A5	4.67744970329352e-92	6.43724162736026	0.01	0	1.40650912578036e-87
HOXA11	5.93170954872382e-92	1.75150983619777	0.22	0.113	1.78366506130125e-87
AC016745.2	1.65418034591346e-91	4.32661097681843	0.017	0.001	4.97412030016176e-87
CASP1	1.89821241796834e-91	2.40242224709106	0.051	0.011	5.70792474083079e-87
FAM3C	2.36938241576168e-91	1.73943637263261	0.358	0.233	7.12473292419538e-87
COL10A1	2.1034999102988e-90	4.87641796161804	0.012	0	6.32522423026848e-86
OAZ1	2.37489095917099e-90	0.765223675298764	0.741	0.732	7.14129711422718e-86
SLC51A	2.46810549306588e-90	3.58260570368192	0.021	0.002	7.42159321764911e-86
KLF5	2.59468056842074e-90	2.67295958599041	0.073	0.02	7.80220446924117e-86
VCAM1	5.1172413869491e-90	2.85843225423937	0.109	0.039	1.53875448505559e-85
CCL2	6.32766283060906e-90	0.661628817350464	0.225	0.11	1.90272821316414e-85
ATP2B1	6.90180111917694e-90	1.21513817559144	0.39	0.264	2.07537159653651e-85
TNFSF15	1.88208191454326e-89	2.99445224353881	0.039	0.007	5.65942031703157e-85
DIRAS3	2.22614401895949e-89	3.80620506165729	0.029	0.004	6.69401506501119e-85
DDB2	6.26315137843933e-89	2.44310933774818	0.081	0.024	1.88332961949671e-84
COPRS	7.49344116703352e-89	1.65677982311591	0.218	0.112	2.25327775892698e-84
AC100861.2	7.75398896446304e-89	3.96696007622719	0.016	0.001	2.33162448161404e-84
DENND6A-AS1	1.30303135277812e-88	4.04636915292551	0.015	0.001	3.91821527780381e-84
CX3CL1	1.53926480359312e-88	1.73775251763322	0.074	0.021	4.62856926440453e-84
AP001266.1	1.78246125666019e-88	5.18594941211554	0.013	0	5.35986099877721e-84
TNFSF13B	3.16769723317462e-88	3.21579212341896	0.034	0.005	9.52526558015607e-84
MIR4435-2HG	5.62480207541375e-88	1.11081526561202	0.268	0.15	1.69137798407692e-83
FREM1	6.11678366305721e-88	3.14565257720436	0.1	0.035	1.8393168474813e-83
AC074387.1	1.95563705158165e-87	4.72188217806497	0.012	0	5.88060061410602e-83
AP001160.1	2.69557350483803e-87	2.5601871611017	0.049	0.01	8.10558952904795e-83
DCDC2C	5.11323131275223e-87	4.49946528913913	0.013	0.001	1.53754865574459e-82
COL2A1	5.58132009012354e-87	4.93281272243467	0.013	0.001	1.67830295110015e-82
CXCL16	8.43270629043828e-87	2.58093330572577	0.06	0.015	2.53571478153479e-82
MS4A2	1.466969699425e-86	6.53946829101373	0.01	0	4.41117788617096e-82
SFRP1	1.51459525398512e-86	1.06246557190645	0.509	0.38	4.55438792873325e-82
PSIP1	1.957348773711e-86	1.28053351963898	0.267	0.152	5.88574776254899e-82
TSPAN33	4.00286629189929e-86	3.3870595796834	0.027	0.003	1.20366189397412e-81
C1orf123	9.74336992114494e-86	1.48575753394665	0.184	0.089	2.92983133528828e-81
PLXNA2	1.14666576004914e-85	3.69121968092261	0.035	0.006	3.44802394046776e-81
UNC13A	1.17557995381498e-85	4.84000381293672	0.013	0.001	3.53496892112165e-81
LINC00324	1.19683130966827e-85	2.77161146273129	0.046	0.009	3.59887174817248e-81
KCNK15	1.63535406385062e-85	2.88571508135347	0.042	0.008	4.91750966999883e-81
IFI30	2.74841826534907e-85	3.1364452593065	0.055	0.013	8.26449372390467e-81
WFDC2	4.78093753274149e-85	5.19539887703971	0.151	0.067	1.43762791609537e-80
LYRM1	6.03446071827223e-85	1.54557748329391	0.159	0.07	1.81456233798446e-80
LINC01415	6.16229131345227e-85	3.84530253816367	0.018	0.001	1.8530009979551e-80
GPM6B	1.01409104250461e-84	1.58877798322473	0.242	0.134	3.04937176481138e-80
SULF2	1.23867484164268e-84	0.156762102000262	0.161	0.335	3.72469524881954e-80
OOEP	1.24345622615184e-84	5.0485932939959	0.01	0	3.73907287203859e-80
MT-ATP8	1.70005047507932e-84	0.671925566408428	0.457	0.318	5.11205177856352e-80
EDIL3	3.13836475092195e-84	1.29268400530549	0.149	0.063	9.43706280602231e-80
LRRC74B	3.34497719247042e-84	5.31215695897906	0.012	0	1.00583464177586e-79
ETV7	3.88896535846842e-84	2.73658327386699	0.032	0.005	1.16941188329145e-79
KIAA0040	5.77352481607987e-84	1.44005091799287	0.107	0.039	1.73609891219522e-79
DSCAML1	1.62442818974544e-83	5.5434	0.013	0.001	4.88465556656454e-79
LINC02418	1.78821203320641e-83	5.02842977858635	0.01	0	5.37715358385169e-79
CDV3	2.20846000703357e-83	1.17100442759565	0.343	0.223	6.64083924114996e-79
GABRG3	3.67656576494189e-83	4.21739186314022	0.021	0.002	1.10554332551803e-78
TACSTD2	4.11250471291148e-83	3.55634120201315	0.041	0.008	1.23663016717248e-78
AC139887.4	5.22552355933426e-83	2.5349487166364	0.043	0.009	1.57131493429181e-78
LOXL1	5.84030526589446e-83	2.18158088205871	0.121	0.048	1.75617979345447e-78
C5orf38	7.35870171866755e-83	4.21658672384142	0.013	0.001	2.21276160680333e-78
MINOS1	1.60125616923145e-82	0.954505015350378	0.341	0.21	4.81497730087898e-78
SOX9	2.26400913786032e-82	2.72525319682012	0.026	0.003	6.80787547754598e-78
SVEP1	2.47663861034366e-82	2.91872379919867	0.142	0.062	7.44725230130339e-78
TM4SF1	3.04254493459444e-82	1.86619139607585	0.107	0.039	9.14893261832547e-78
PLAU	6.72423855766551e-82	1.80636929930045	0.223	0.117	2.02197853429002e-77
ANXA5	9.14779443691356e-82	0.784370725737718	0.725	0.753	2.75074178717991e-77
KRT8	1.17906539705493e-81	2.25829353061171	0.072	0.021	3.54544964894416e-77
VTCN1	1.22260504793581e-81	7.3781524627362	0.013	0.001	3.67637337914299e-77
LINC00592	2.63533119081345e-81	4.61511629771607	0.012	0	7.92444089077606e-77
SPATS2L	2.85455655438748e-81	1.47447730295923	0.309	0.193	8.58365155904315e-77
EVA1A	3.27881317951463e-81	2.18043962717419	0.052	0.012	9.85939123080049e-77
KMT2E	3.90153832805241e-81	1.16536000950137	0.41	0.281	1.17319257524536e-76
RAB3IP	4.8045986936411e-81	3.04376516896759	0.044	0.009	1.44474282717788e-76
RHBDF2	7.22744957084948e-81	2.57495854696438	0.027	0.004	2.17329408595444e-76
CLIC3	1.48819243309547e-80	2.33744249799395	0.045	0.009	4.47499464631807e-76
MSC-AS1	1.03926183341096e-79	1.63507506698178	0.078	0.025	3.12506033306677e-75
OAF	1.55423197649805e-79	1.60772771432619	0.374	0.261	4.67357555332964e-75
CNTN1	1.57465176064166e-79	2.16902606631295	0.109	0.041	4.73497784424947e-75
PLTP	3.98749023289449e-79	1.27248630247819	0.361	0.234	1.19903831303137e-74
CABLES1	4.476232875467e-79	4.12040126776636	0.036	0.006	1.34600322565293e-74
FBP1	4.71963949738844e-79	3.31409954381803	0.024	0.003	1.4191955968647e-74
LACTB	4.87296497279743e-79	1.60799766302197	0.155	0.071	1.46530056732019e-74
CITED4	5.24584794912018e-79	2.87316602754941	0.072	0.022	1.57742647830044e-74
STARD10	7.20641025349586e-79	2.34971696368157	0.113	0.044	2.1669675632262e-74
CCNL2	7.74139065863403e-79	2.37127761254183	0.32	0.211	2.32783617105125e-74
TFPI2	8.46957007068137e-79	1.84991696339746	0.133	0.056	2.54679972025389e-74
RSPO3	1.2879821404941e-78	2.75682440234708	0.138	0.061	3.87296229646576e-74
NHLH1	1.45191509803466e-78	4.0193986947544	0.018	0.002	4.36590869979022e-74
MDM2	1.48852770968461e-78	1.84479970505883	0.214	0.114	4.47600282302162e-74
FGF23	1.78742203253432e-78	5.64997792566129	0.01	0	5.3747780518307e-74
STXBP6	1.85990029948425e-78	4.88639984467439	0.032	0.005	5.59272020054914e-74
ARHGEF25	1.95534935243317e-78	3.65596243049272	0.11	0.044	5.87973550276654e-74
VIPR2	2.0369664064772e-78	1.97264456908641	0.125	0.052	6.12515798427693e-74
GNAS	2.20433909448804e-78	0.651024356196173	0.663	0.678	6.62844765712553e-74
SEPT11	2.28468883205265e-78	1.02770242228462	0.307	0.187	6.87005931798231e-74
JCHAIN	2.52686932786769e-78	7.36802039090787	0.014	0.001	7.59829606889816e-74
SLC35G2	3.11872386172303e-78	2.17421542793359	0.049	0.011	9.37800265220116e-74
TIGD3	3.50356048035068e-78	4.70571951343395	0.013	0.001	1.05352063644145e-73
CCND1	3.65395795067736e-78	1.35080483498057	0.194	0.097	1.09874515576868e-73
UNC13D	1.49197135480849e-77	3.50770587127306	0.043	0.009	4.48635786390914e-73
CNBP	1.97917602165496e-77	0.893044596449519	0.572	0.499	5.95138229711648e-73
BAALC	2.34050855023726e-77	2.73012289241014	0.027	0.004	7.03790921056343e-73
CYP7B1	4.57712766790313e-77	1.64631352312214	0.12	0.048	1.37634228973847e-72
ATRNL1	8.93237021756602e-77	4.97364019649943	0.05	0.012	2.6859637244221e-72
DES	1.4462241022088e-76	3.10912083427446	0.096	0.035	4.34879587534186e-72
PQLC3	1.9545273793071e-76	1.72869369999251	0.109	0.043	5.87726382957644e-72
HPCAL1	2.40538329690884e-76	1.40538565470497	0.168	0.08	7.23298757380489e-72
IFNGR1	2.82022054252227e-76	1.27934370896045	0.308	0.191	8.48040317136447e-72
FAIM2	3.43861289491158e-76	4.59902015161297	0.027	0.004	1.03399089749991e-71
NR3C2	3.63688792744226e-76	2.99667031056407	0.041	0.008	1.09361219978189e-71
AC068888.1	6.43676035101105e-76	1.75493370203223	0.077	0.024	1.93553383754902e-71
PODN	7.51920314801742e-76	2.66762	0.189	0.099	2.26102438660884e-71
MYLK	7.59859796254474e-76	1.18760220549563	0.33	0.204	2.2848984073372e-71
RERG	6.80393482873428e-75	2.41246066481565	0.112	0.045	2.0459432030004e-70
GULP1	9.39884236677433e-75	1.42149625544429	0.27	0.161	2.82623189968904e-70
EPHA3	9.73483761893185e-75	3.05689646524689	0.041	0.009	2.92726567201281e-70
CHGA	1.20785574783367e-74	3.21122920471261	0.051	0.013	3.63202223373585e-70
ACOT11	2.25035105166393e-74	4.37664569486514	0.026	0.004	6.76680561235344e-70
WNT2B	4.35773145457964e-74	2.14448900526511	0.077	0.025	1.3103698483921e-69
ARHGAP18	1.13337162869066e-73	1.66970459730205	0.108	0.042	3.40804848747282e-69
COL8A2	1.29103138870179e-73	2.37433124114248	0.037	0.007	3.88213138582629e-69
PHLDA2	2.33834499865013e-73	1.29072031402086	0.211	0.113	7.03140341094094e-69
ATP2B2	3.42275861025129e-73	5.37383383757752	0.011	0.001	1.02922351410256e-68
HS3ST6	3.47745445242013e-73	3.81881263102358	0.013	0.001	1.04567055384273e-68
CPQ	4.33730258414393e-73	1.19104211007652	0.334	0.212	1.30422688705208e-68
BHLHE41	4.57102981982452e-73	1.30757728563135	0.192	0.097	1.37450866682123e-68
PLA2G16	6.88285620709385e-73	1.59765258787844	0.104	0.041	2.06967486147312e-68
MMP3	6.91393664382682e-73	0.766457593548426	0.048	0.012	2.07902074879873e-68
PDE5A	9.66808398906112e-73	1.61746674456086	0.199	0.104	2.90719285551068e-68
SLC16A4	1.19581554353404e-72	1.81829057920125	0.078	0.026	3.59581733940687e-68
SNHG7	1.48566633049284e-72	0.910662257537264	0.399	0.284	4.46739865579198e-68
TMEM119	1.63017941615701e-72	1.28126416019991	0.144	0.064	4.90194950438414e-68
GTPBP4	1.66231018155022e-72	1.44133154507638	0.278	0.175	4.99856671592151e-68
NAV2-AS3	2.21389443768801e-72	2.73522457650881	0.02	0.002	6.65718057412786e-68
AC011405.1	2.31617764179369e-72	3.87043720296905	0.018	0.002	6.96474616887363e-68
AC008074.3	2.84618923779976e-72	4.58704339663538	0.013	0.001	8.55849103806386e-68
SLC35E3	3.34822985873528e-72	2.15878081329957	0.142	0.065	1.0068127185217e-67
STON2	3.42679762394179e-72	5.51431499117003	0.014	0.001	1.0304380455193e-67
METTL24	3.53776313264823e-72	3.75254738437492	0.021	0.002	1.06380537398732e-67
UBE2V1	3.57443154643963e-72	0.113699405581139	0.078	0.212	1.0748315660144e-67
IFIT1	4.99121466968464e-72	1.91612420010946	0.07	0.022	1.50085825117417e-67
PLXDC2	1.02191990513616e-71	2.44349650282702	0.153	0.074	3.07291315474443e-67
LINC01759	1.3086730413986e-71	3.9124491544511	0.017	0.002	3.93517983548559e-67
DPYSL3	1.46693944505104e-71	1.56880930902119	0.146	0.067	4.41108691126848e-67
RASSF8	2.41791122271703e-71	1.18845963851984	0.277	0.169	7.27065904671012e-67
HNRNPH3	2.47513091228069e-71	1.05094580242619	0.536	0.453	7.44271865322804e-67
BIRC7	4.231913581459e-71	2.90911083621441	0.033	0.006	1.27253641394472e-66
TMEM47	4.54939355959527e-71	1.58242622269988	0.163	0.079	1.3680026433703e-66
RSAD2	4.57774840915506e-71	2.96359936078232	0.029	0.005	1.37652894663293e-66
LGALS4	7.20748633871088e-71	3.38255464009572	0.023	0.003	2.16729114205036e-66
RNF157	1.05644403183438e-70	2.26466146682744	0.045	0.011	3.17672720372598e-66
EDN2	1.10471498527701e-70	3.80508311670774	0.011	0.001	3.32187796072796e-66
DNTTIP2	1.27701777053654e-70	1.33269555671941	0.285	0.18	3.83999243600337e-66
YBX1	1.63578091392134e-70	0.613041420125367	0.673	0.639	4.91879320816147e-66
CHCHD10	2.01759293611775e-70	0.890696333465218	0.462	0.349	6.06690195890607e-66
IGF2BP2	2.46698948876646e-70	2.3956177862506	0.088	0.032	7.41823739272075e-66
GALNT9	5.42507809990418e-70	2.93967765361266	0.02	0.002	1.63132098464119e-65
MAST1	6.36959312219402e-70	4.48626738801264	0.012	0.001	1.91533665184374e-65
PREX2	6.79032047044601e-70	2.88432588930154	0.051	0.013	2.04184936546312e-65
TERF2IP	7.33683665876231e-70	0.995548523623248	0.38	0.266	2.20618678328983e-65
RGMB	8.02139299098839e-70	2.33851490883836	0.119	0.051	2.41203287239021e-65
CD63	8.26883703239188e-70	0.608993517235083	0.783	0.912	2.48643929564024e-65
KIAA0930	1.12041244684935e-69	1.70413240042561	0.145	0.067	3.36908022767598e-65
NUPL2	1.23178876217434e-69	1.93222936624068	0.094	0.036	3.70398880785824e-65
TANC1	1.42717766624186e-69	1.48654441614467	0.163	0.08	4.29152324238928e-65
DMKN	1.82331172088383e-69	2.55553	0.065	0.02	5.48269834469766e-65
LCK	2.02666261820754e-69	3.34455637764744	0.02	0.002	6.09417449295007e-65
FZD6	2.33319163325925e-69	2.99575992788911	0.037	0.008	7.01590724121056e-65
TRMT10C	3.99346493781848e-69	1.16760588862484	0.23	0.131	1.20083490680202e-64
CD82	5.5085478093554e-69	2.39140136332752	0.07	0.022	1.65642032627317e-64
MAMDC2-AS1	6.36773548882523e-69	3.35102209736909	0.017	0.002	1.91477806148975e-64
SLC46A3	1.03040848903657e-68	2.75515174954278	0.046	0.011	3.09843832653296e-64
AKR7A2	1.76727200012262e-68	1.29880405004019	0.248	0.147	5.31418690436873e-64
AC138150.1	1.80917604936369e-68	1.95890476042917	0.044	0.01	5.44019238043662e-64
FAM208B	2.35945819336965e-68	1.49068628191376	0.13	0.058	7.09489078746254e-64
ATP6V1E2	2.4523924797586e-68	1.77170126275519	0.081	0.028	7.37434418663411e-64
C17orf67	2.61162019499716e-68	1.9477569152819	0.095	0.037	7.85314192635646e-64
CSMD3	2.98752359263197e-68	4.22401974464981	0.013	0.001	8.98348344304433e-64
C3orf80	3.61074345242347e-68	3.82085546108052	0.016	0.001	1.08575055614374e-63
LMO3	5.44326251579209e-68	4.16712809138952	0.03	0.005	1.63678903849868e-63
AC005162.3	9.7028443679622e-68	3.94483386956942	0.012	0.001	2.91764530144623e-63
KIAA1217	1.12619975471478e-67	2.1114975837076	0.102	0.041	3.38648266242733e-63
NEGR1	1.68355557289116e-67	2.64845072279672	0.048	0.012	5.0624516076837e-63
KCNMA1	2.47493806882858e-67	2.30759	0.102	0.041	7.44213877296755e-63
ST3GAL4	3.11555798410497e-67	1.86684521486118	0.126	0.056	9.36848285820366e-63
RRAGD	3.24457503715353e-67	1.93190751493432	0.048	0.012	9.75643713672067e-63
HS6ST2	4.13119833968079e-67	2.97240661602464	0.023	0.003	1.24225134074201e-62
DCDC2	6.40036459222593e-67	3.73203820469497	0.019	0.002	1.92458963288234e-62
HHIP-AS1	1.21201779797829e-66	1.55817826220542	0.094	0.036	3.64453751852071e-62
GCM1	1.37325110707097e-66	4.80233785521267	0.011	0.001	4.12936607896242e-62
MICALL2	1.47916413649825e-66	2.05487049705685	0.087	0.032	4.44784655845025e-62
CYR61	1.90991163754497e-66	0.669772614058808	0.362	0.234	5.74310429409771e-62
PPP1R13L	2.64843206018032e-66	2.72428948614262	0.049	0.013	7.96383520496222e-62
CYP3A5	2.83717043329474e-66	2.84838567268136	0.04	0.009	8.53137149291728e-62
EPHA1-AS1	3.7812319640429e-66	1.73473972926933	0.064	0.02	1.1370164515877e-61
PLD5	3.99010172766866e-66	4.87541999913207	0.013	0.001	1.19982358950997e-61
TMEM158	4.2338506060965e-66	1.76345529615994	0.22	0.128	1.27311887725322e-61
MREG	6.36047526973868e-66	3.20613297169819	0.029	0.005	1.91259491361042e-61
TENT5A	7.87394768488489e-66	1.47129740443836	0.285	0.181	2.36769606884489e-61
HEXDC	8.12676402083836e-66	2.07397211114704	0.072	0.024	2.44371794106609e-61
UBA7	8.39836730038686e-66	3.57388180855906	0.055	0.016	2.52538904722633e-61
GDNF	1.12394915187236e-65	2.39927571587279	0.026	0.004	3.37971509968017e-61
AL049629.1	1.26430841051694e-65	3.8380196460521	0.014	0.001	3.80177539042444e-61
CHRDL2	1.2772345791695e-65	5.5275222049499	0.016	0.002	3.84064437956268e-61
GAMT	1.29490101472994e-65	1.41398	0.121	0.053	3.89376735129292e-61
NHSL2	1.72006217140677e-65	2.38926184727697	0.052	0.014	5.17222694942016e-61
AC011944.1	2.50884997116281e-65	4.00556530896625	0.017	0.002	7.54411186328656e-61
LINC02001	2.94527194900552e-65	1.83107348304061	0.087	0.033	8.8564327506596e-61
MAS1	3.02716019894056e-65	4.07943576931125	0.013	0.001	9.10267071821426e-61
DLGAP2	7.87379495391336e-65	3.35696036121583	0.014	0.001	2.36765014264175e-60
AC009549.1	8.96585268650548e-65	2.03540065082559	0.038	0.009	2.6960319028322e-60
KCTD9	9.79858951518159e-65	2.59370732424275	0.122	0.054	2.94643586721511e-60
LAMC2	2.06626921044393e-64	2.94184978447648	0.026	0.004	6.21327151580491e-60
HRK	2.27584893780411e-64	4.29739710723799	0.01	0	6.84347775597696e-60
GREM1	2.46543656361728e-64	1.50430948739125	0.078	0.027	7.41356774679716e-60
ANGPTL4	2.72552175892134e-64	1.42187637191146	0.072	0.024	8.19564392907647e-60
AC012377.1	3.45692178914692e-64	4.29862571532551	0.013	0.001	1.03949638199648e-59
SPIB	3.59919000768306e-64	4.74005336084645	0.011	0.001	1.0822764353103e-59
FRMD6	3.62963024160582e-64	1.71358122145738	0.254	0.157	1.09142981365087e-59
AL662796.1	3.84595364046757e-64	2.9603716312865	0.028	0.005	1.1564782596886e-59
TNS3	4.26657978556599e-64	2.42224246525833	0.118	0.052	1.28296054151969e-59
FBLN1	5.69231551482431e-64	1.02455493597141	0.755	0.759	1.71167927530767e-59
GASK1B	5.71455586780337e-64	0.496671559877025	0.069	0.198	1.71836694944847e-59
UCK2	5.97584920867262e-64	1.54332857789412	0.095	0.037	1.79693785704786e-59
IL7R	6.37633179859281e-64	2.33879107179542	0.034	0.007	1.91736297183686e-59
ZNF778	7.15412973618597e-64	2.26552224354229	0.042	0.01	2.15124681167112e-59
GSAP	9.29455891100305e-64	4.62171744647633	0.02	0.003	2.79487386453862e-59
2025-12-01	1.04839245207486e-63	4.53538395644754	0.012	0.001	3.1525161033891e-59
ANKRD62	1.34384898326162e-63	4.85391679932175	0.01	0.001	4.04095389266769e-59
THRB	1.55713454657569e-63	2.52278626659168	0.023	0.003	4.68230358155309e-59
BCHE	1.57540219649445e-63	3.38225941245364	0.097	0.04	4.73723440485881e-59
ENTPD1	1.70897074825296e-63	2.76574512382328	0.072	0.025	5.13887503999665e-59
KDSR	1.73530278939068e-63	1.48895403819759	0.257	0.157	5.21805548769778e-59
FAM19A2	1.90406730634989e-63	3.15520827115605	0.025	0.004	5.72553039019411e-59
AFF3	2.04118235010786e-63	0.987679781421954	0.121	0.052	6.13783532677435e-59
MUC20-OT1	2.6134279686038e-63	1.41118545477939	0.148	0.073	7.85857790159163e-59
NDUFV2-AS1	4.82231633314319e-63	2.56940319268072	0.033	0.007	1.45007052137616e-58
THBS4	7.07177656046246e-63	3.18430118691906	0.032	0.006	2.12648321173106e-58
ITGA6	7.53811534682366e-63	1.25357698587219	0.149	0.072	2.26671128478987e-58
RASSF5	7.5796598273839e-63	2.60096309990163	0.029	0.005	2.27920371009434e-58
PLXDC1	8.23615853933095e-63	2.28240925372511	0.117	0.052	2.47661287277682e-58
ZNF385B	8.26999598705546e-63	5.6035705357041	0.012	0.001	2.48678779330758e-58
ALDH2	1.08825242469445e-62	1.51370799568745	0.199	0.111	3.2723750410562e-58
SMIM33	1.12942651706262e-62	4.64346029170944	0.011	0.001	3.3961855368073e-58
EPHX1	1.35564242329045e-62	1.88505887573444	0.233	0.14	4.07641676683439e-58
SLC26A4	1.9450168854915e-62	3.43199680456388	0.02	0.003	5.84866577467295e-58
CD81	4.1197330875134e-62	0.506805579181308	0.745	0.822	1.23880373941528e-57
CSF2	4.21555978345265e-62	5.53643466016673	0.01	0.001	1.26761882688421e-57
TXNRD1	4.60874518437594e-62	1.44777064235268	0.219	0.128	1.38584967694185e-57
HSD11B1	5.57995738346347e-62	2.59604104236059	0.041	0.01	1.67789318520747e-57
ZNF483	5.59602421896402e-62	2.69342753246566	0.084	0.032	1.68272448264248e-57
PINX1.1	6.55168500266515e-62	2.21526595492215	0.052	0.015	1.97009168030141e-57
HEXA	7.31799670798173e-62	1.29804184123576	0.307	0.202	2.20052161009011e-57
SMARCB1	1.00069547209306e-61	1.20677452524909	0.252	0.153	3.00909128458382e-57
TSPAN4	1.07357532578492e-61	1.26298591863756	0.358	0.254	3.22824100463526e-57
BMPR1B	1.88858360318249e-61	4.66686206305309	0.022	0.003	5.67897089476974e-57
BEX1	2.00400904074915e-61	2.21966552918548	0.032	0.006	6.02605518553269e-57
SCG5	2.26676112899285e-61	1.01886156233705	0.138	0.065	6.81615071488149e-57
ARHGAP42	2.37888848879261e-61	1.83797630177638	0.12	0.054	7.15331768579939e-57
CARD16	2.65759386590824e-61	1.53749782581795	0.101	0.042	7.99138475478609e-57
HACD4	3.6593609978022e-61	1.58666028983061	0.099	0.04	1.10036985203912e-56
C2orf40	3.99866481283688e-61	0.990665775461793	0.029	0.005	1.20239850922005e-56
HERC5	4.98474762637353e-61	2.25582390838996	0.053	0.015	1.49891361125052e-56
EDA	5.30441626834761e-61	4.16096151030532	0.031	0.006	1.59503797189213e-56
HSBP1L1	6.00741204808428e-61	1.1904421112092	0.136	0.064	1.80642880285894e-56
AC006449.6	7.53924599256376e-61	1.77430422792576	0.047	0.013	2.26705126996392e-56
EVC2	1.01065126435131e-60	2.50683107158037	0.069	0.023	3.03902835190438e-56
PARD3B	1.29521542065287e-60	2.44556418379089	0.06	0.019	3.89471276990317e-56
CRELD1	1.31256622280033e-60	2.42601792110118	0.091	0.036	3.94688663196059e-56
UBE2C	1.3398324295346e-60	4.55692538714919	0.018	0.002	4.02887611561054e-56
CHL1	2.76856004454012e-60	2.96512189780248	0.017	0.002	8.32506005393215e-56
IL11RA	3.82271739868315e-60	2.64261883851208	0.088	0.035	1.14949112178402e-55
DNHD1	5.83821423160676e-60	2.98874830735211	0.033	0.007	1.75555101944415e-55
C1orf52	6.27035724164473e-60	1.09096935768252	0.244	0.147	1.88549642256257e-55
DLGAP1-AS2	6.27422557680986e-60	1.77839796990287	0.043	0.011	1.88665963094673e-55
RSPO1	1.36755594302003e-59	2.25322282056946	0.046	0.012	4.11224072066122e-55
TMEM238	2.30816797910561e-59	4.75759110622772	0.022	0.003	6.94066111317056e-55
TRIO	2.54665622172049e-59	2.3536023219596	0.153	0.078	7.6577952587135e-55
TNFRSF4	2.82195552848645e-59	1.81087541977499	0.067	0.023	8.48562027415876e-55
SEPT8	2.85898554162751e-59	1.96544918252066	0.061	0.019	8.59696952367393e-55
TMPRSS9	3.2460145060819e-59	4.41038741559696	0.012	0.001	9.76076561978826e-55
SCPEP1	3.66895243966385e-59	1.31043913055727	0.242	0.147	1.10325399860692e-54
CHPT1	4.43640677401642e-59	1.6927589139183	0.215	0.127	1.33402751694674e-54
RBAK-RBAKDN	6.10224067341426e-59	2.53069859420069	0.043	0.011	1.83494377049567e-54
ACADVL	6.95250696241217e-59	1.35954067545064	0.36	0.257	2.09061884359734e-54
CTSK	9.33615458503833e-59	1.00658017590712	0.478	0.375	2.80738168372103e-54
ALKAL2	9.93784123024832e-59	3.46319386729613	0.025	0.004	2.98830885793567e-54
LENG8	1.63368241533305e-58	2.72683739443185	0.223	0.14	4.91248302290647e-54
CD160	1.76973364363047e-58	3.26493132285815	0.016	0.002	5.32158906639682e-54
AL662907.3	2.59128699111337e-58	4.61262568260298	0.01	0.001	7.7919999822779e-54
EDA2R	3.04561275785355e-58	3.22661504571462	0.039	0.01	9.15815756286564e-54
SHISA2	5.46104580343068e-58	3.1287504420153	0.016	0.002	1.64213647309161e-53
IL7	5.46689469378698e-58	2.47317504243961	0.033	0.007	1.64389523442175e-53
DRAM1	5.69574954909402e-58	1.49240104441098	0.175	0.094	1.71271188941257e-53
WISP2	9.63952907376924e-58	0.490021787533144	0.081	0.03	2.89860639248241e-53
CTDSPL	1.34486693358504e-57	1.60098939878624	0.134	0.065	4.0440148692902e-53
JAM2	1.35586272236108e-57	1.81186095770611	0.111	0.05	4.07707920613976e-53
SPTBN4	1.90008262132992e-57	3.77140979214263	0.022	0.003	5.71354844233908e-53
MGARP	2.18154639874679e-57	3.03963693980897	0.028	0.005	6.55991002103158e-53
DDIT3	2.32320277469569e-57	1.28718305818828	0.328	0.228	6.98587074350993e-53
WDR66	2.34462399498846e-57	2.85427711212931	0.046	0.013	7.05028435293029e-53
IL17D	3.41563806660202e-57	2.01211271332972	0.049	0.014	1.02708236662723e-52
ADAM28	3.53241455297396e-57	5.1456053531063	0.018	0.002	1.06219705607927e-52
SRGAP1	7.60385882110301e-57	1.50791595701403	0.184	0.103	2.28648034750567e-52
AGTR2	7.63408286264632e-57	4.65246964057738	0.013	0.001	2.29556871679775e-52
WASL	1.3189675520594e-56	0.994687329801463	0.331	0.226	3.96613542904263e-52
MAP2K2	1.3614092253629e-56	1.06108178828529	0.35	0.242	4.09375754066623e-52
SLC25A4	1.5815543187477e-56	1.45965944737144	0.081	0.031	4.75573383647434e-52
SEPT1	1.7431969483709e-56	1.86241345159594	0.07	0.025	5.2417932237513e-52
C6orf106	2.58405101616298e-56	1.89862607093007	0.066	0.023	7.77024140560207e-52
AC098864.1	3.02908431554236e-56	3.81676333603131	0.013	0.001	9.10845653683587e-52
PDE4DIP	3.03364404109275e-56	0.826269268985864	0.124	0.057	9.1221676315659e-52
ACP5	3.34134639907001e-56	1.67069650934132	0.177	0.097	1.00474286220035e-51
PHF5A	3.45142310470741e-56	1.42960006875691	0.165	0.087	1.03784292758552e-51
CMKLR1	4.18902200842664e-56	3.84539939391015	0.026	0.005	1.25963891793389e-51
CES4A	7.69238888252522e-56	3.99254272823641	0.029	0.006	2.31310133697533e-51
CHID1	1.06155321550715e-55	1.32245940894725	0.311	0.211	3.19209051903001e-51
EVA1B	1.13751716395638e-55	0.78204940612852	0.407	0.3	3.42051411201683e-51
AC092667.1	1.16264924861692e-55	2.92607992298211	0.019	0.003	3.49608629059109e-51
LINC01354	1.32020535289494e-55	2.50732995799098	0.023	0.004	3.96985749615509e-51
ZNF385C	1.41881107711682e-55	3.4242018835471	0.013	0.001	4.26636490889028e-51
PTHLH	1.6079918669031e-55	1.06755042889219	0.111	0.049	4.83523154377763e-51
LINC02381	2.26316915723423e-55	1.72978636415832	0.027	0.005	6.80534965580332e-51
PELO	2.33664416939996e-55	1.39092402171333	0.178	0.098	7.02628901738567e-51
HES1	3.16435434726123e-55	0.514430386510929	0.174	0.092	9.51521352221451e-51
YRDC	5.753621310962e-55	1.60000093216094	0.106	0.048	1.73011392820627e-50
LINC01836	6.71103770726574e-55	4.36177019823164	0.011	0.001	2.01800903857481e-50
APP	7.36161368311339e-55	1.4201978358044	0.526	0.458	2.2136372345122e-50
MMP11	8.96072665029567e-55	0.929982879774321	0.476	0.354	2.69449050374391e-50
COL4A3BP	9.56005898813159e-55	1.3375651102679	0.141	0.072	2.87470973773117e-50
MBP	9.83238129812237e-55	2.0253384853877	0.072	0.026	2.9565970563454e-50
ZNF568	1.05208003986061e-54	2.8755323327153	0.063	0.022	3.16360467986084e-50
B3GLCT	1.14579995623351e-54	3.82727992256131	0.052	0.016	3.44542046839417e-50
AL603832.1	1.6273484779672e-54	3.58150179231808	0.012	0.001	4.89343687324738e-50
NTM	2.11479764776579e-54	1.67927589067141	0.039	0.01	6.35919652683173e-50
FOXQ1	3.1803620410273e-54	1.92574489493842	0.042	0.011	9.56334865736909e-50
CADM1	4.06527907001028e-54	1.50205580587395	0.072	0.026	1.22242941635209e-49
CYTH3	5.25388477194964e-54	1.65726082612805	0.106	0.047	1.57984315092526e-49
KCMF1	5.90453075450783e-54	1.41137137473729	0.211	0.126	1.77549239788051e-49
NEXN-AS1	6.08694752664241e-54	2.08458509169405	0.034	0.008	1.83034512126137e-49
MCTP1	6.13795974946842e-54	2.88259020415568	0.023	0.004	1.84568449666515e-49
PLBD1	6.47711626102583e-54	1.41987513706296	0.121	0.057	1.94766885969047e-49
LYSMD2	7.05857839667109e-54	2.44302226058685	0.038	0.01	2.122514523879e-49
TNFRSF14	7.65652188673115e-54	1.83944	0.165	0.091	2.30231613134006e-49
ACSL6	9.29453405881473e-54	4.31351333492727	0.011	0.001	2.79486639148559e-49
SLC7A11	1.7367687986195e-53	2.65832727097785	0.033	0.007	5.22246377744885e-49
PRCD	2.47706599796434e-53	2.67810613853209	0.033	0.007	7.44853745587876e-49
PRKG1	2.51076642101903e-53	1.5927582662801	0.155	0.082	7.54987462800422e-49
PLAG1	3.33208014219909e-53	3.55061124139179	0.051	0.016	1.00195649875927e-48
LRP1	3.54127021122269e-53	1.61448965036951	0.473	0.381	1.06485995251466e-48
AC037459.2	3.81897944631691e-53	2.28211303108861	0.04	0.011	1.14836711950749e-48
FGFR2	3.85085175182866e-53	4.36414846970514	0.031	0.007	1.15795112177488e-48
CCNA1	4.7170292335018e-53	4.38329848672189	0.012	0.001	1.41841069051399e-48
ATP2B4	5.89818338732476e-53	0.440989455951882	0.18	0.317	1.77358374456856e-48
NR3C1	7.71785422145958e-53	1.28992510568536	0.195	0.112	2.3207587643929e-48
NXNL2	8.64136243697029e-53	2.2585842676197	0.055	0.018	2.59845768479697e-48
MYO15B	1.08703568810858e-52	3.36451137531769	0.096	0.043	3.26871631414249e-48
DCAF4L1	1.24424384145643e-52	3.07772477913612	0.015	0.002	3.7414412312595e-48
ANXA3	1.28221995742674e-52	4.4805243676387	0.014	0.002	3.8556354119822e-48
C21orf2	1.39632862157271e-52	1.31157636611785	0.124	0.061	4.19876016506913e-48
CPNE7	1.66381279291155e-52	3.82907329454482	0.01	0.001	5.00308506828503e-48
FGFR1	2.32579683809907e-52	1.16208883256001	0.371	0.277	6.99367109216391e-48
EGLN3	2.42340255635863e-52	1.71484978879777	0.102	0.046	7.28717148697039e-48
FAM173A	2.69995112278894e-52	1.2277182391042	0.146	0.076	8.11875302622633e-48
XIRP1	2.75854160685945e-52	1.9558018570282	0.031	0.007	8.29493461182636e-48
AC040977.1	2.82226386667776e-52	2.79574566966122	0.024	0.005	8.48654744710003e-48
ICAM5	3.30600656003e-52	3.05765923147386	0.016	0.002	9.94116172601021e-48
ITGAM	3.4277192206984e-52	3.78196727921414	0.016	0.002	1.03071516966401e-47
ALG1L2	3.44464439779633e-52	2.60163167779278	0.028	0.006	1.03580457041736e-47
S100A7	3.77033226595143e-52	2.77841329774826	0.018	0.002	1.1337389123716e-47
CBX7	6.25761080383188e-52	2.35043282030626	0.086	0.036	1.88166356871225e-47
LINC00691	6.28226252863421e-52	3.42789449263357	0.013	0.001	1.88907634236031e-47
BHMT2	7.72512491332586e-52	1.77845981262321	0.128	0.064	2.32294506143709e-47
WLS	1.0211943289208e-51	1.12737286359756	0.293	0.193	3.07073134706484e-47
TBRG1	1.16865128855052e-51	1.47233733948717	0.195	0.114	3.51413442467141e-47
FYB1	1.45126123959259e-51	3.01101793510254	0.026	0.005	4.36394254745492e-47
CYBRD1	1.50483869919721e-51	1.87140734244275	0.287	0.196	4.52504996848601e-47
COLGALT2	1.84529542713664e-51	4.37316874055308	0.017	0.002	5.54880334939987e-47
IL12A	2.18011835148817e-51	2.00221981014967	0.018	0.003	6.55561588292493e-47
HSPE1	2.49678479323021e-51	0.250560324405963	0.492	0.685	7.50783187324326e-47
MMP24OS	2.601839212036e-51	1.3975981748959	0.232	0.146	7.82373051059225e-47
MPC2	5.43164048934913e-51	1.0592069062606	0.267	0.174	1.63329429514728e-46
SCGB2A1	7.08452854357422e-51	4.02039025010045	0.072	0.028	2.13031773305277e-46
CHRDL1	1.0603486052487e-50	3.29057160570356	0.04	0.011	3.18846825598285e-46
PERP	2.02594628787963e-50	2.16296808417488	0.108	0.051	6.09202048765403e-46
RASGRF1	2.04574385078335e-50	3.1339586281303	0.015	0.002	6.15155175930554e-46
AC061992.1	2.7520792457915e-50	4.03481501119099	0.014	0.002	8.27550229209503e-46
MBD2	3.14299817355554e-50	1.66386487148191	0.197	0.118	9.45099550788152e-46
MAFG-DT	3.38498421974674e-50	2.29155446239267	0.038	0.01	1.01786475487785e-45
HSPB6	4.41281476704341e-50	0.889487818113812	0.184	0.337	1.32693340044995e-45
PTN	4.80478451142014e-50	1.22909789395823	0.544	0.533	1.44479870258404e-45
TSPAN3	5.45792455879796e-50	1.32988071099297	0.316	0.223	1.64119791483055e-45
DOK5	5.75740764931357e-50	1.55797219839718	0.047	0.014	1.73125248014859e-45
CPEB1-AS1	5.94691310264837e-50	3.62913404119471	0.013	0.001	1.78823676996636e-45
CHI3L1	7.08445982224154e-50	3.84180949330278	0.036	0.009	2.13029706854803e-45
SPI1	1.07738220218071e-49	4.96754516987648	0.014	0.002	3.23968828195741e-45
TYMS	2.33343260015205e-49	3.40313726220775	0.028	0.006	7.01663182865722e-45
DPP7	2.49232174122322e-49	1.04075583075761	0.333	0.238	7.49441147585822e-45
RGS20	2.71059371258011e-49	2.6589671298046	0.026	0.005	8.15075529372839e-45
C22orf46	2.80335358702112e-49	2.49358944756596	0.032	0.008	8.4296842361725e-45
MPHOSPH10	3.81524697123224e-49	1.09766995764339	0.211	0.128	1.14724476424953e-44
FRMD6-AS1	3.90563793389624e-49	1.29040704709829	0.086	0.036	1.1744253267226e-44
HTRA1	4.84382413677067e-49	1.5779983700841	0.478	0.397	1.45653791792694e-44
REEP2	6.31356060852723e-49	3.2024990995138	0.02	0.003	1.89848767498414e-44
PTGER4	6.6230120037609e-49	2.68331172075128	0.038	0.01	1.9915397095309e-44
GADD45A	8.72485783201178e-49	1.48015595762314	0.53	0.479	2.62356475008594e-44
TMEM204	9.14851001378744e-49	1.7257613692618	0.171	0.097	2.75095696114588e-44
PILRB	1.00048869818184e-48	2.88125910951538	0.101	0.047	3.00846951543278e-44
LRRFIP2	1.04232243111593e-48	1.02028716377107	0.238	0.151	3.1342635503656e-44
MICA	1.86296406116872e-48	1.27129046892826	0.132	0.067	5.60193293193434e-44
AL662884.4	2.19814393388438e-48	3.73444475758322	0.014	0.002	6.60981880919034e-44
HSPA4	2.22003068879407e-48	1.04490343252815	0.263	0.176	6.67563228120377e-44
MPV17	2.42904410735003e-48	1.89668858794167	0.198	0.12	7.30413563080153e-44
THAP5	3.36172416649242e-48	1.28889403425271	0.13	0.067	1.01087045686427e-43
ISM1	3.83401282797607e-48	2.60900908182624	0.051	0.017	1.1528876573724e-43
IFIT3	5.81942109117065e-48	1.75349740641706	0.092	0.041	1.74989992211501e-43
PGRMC1	9.70858993392615e-48	0.540083221652396	0.541	0.439	2.91937299313159e-43
AC037459.3	1.12403196197434e-47	2.84078989814022	0.026	0.006	3.37996410965685e-43
MANBA	1.17889227856536e-47	2.29296012108314	0.081	0.034	3.54492908164603e-43
BMP4	1.18487638977381e-47	2.05864534743808	0.106	0.05	3.56292330404984e-43
FHAD1	1.47670424895252e-47	2.35958082748231	0.023	0.004	4.44044967660022e-43
IFIT2	1.66435378706827e-47	2.16495581042396	0.051	0.017	5.0047118377143e-43
AL358072.1	2.00948388375583e-47	3.76977966948938	0.012	0.001	6.0425180384538e-43
SH3BP4	2.67140696141185e-47	1.2910293690416	0.102	0.047	8.03292073296543e-43
PDE11A	2.75247140983897e-47	3.29075601927193	0.016	0.002	8.27668152938578e-43
MICAL2	3.00531143686107e-47	1.44705140919963	0.1	0.046	9.03697149064122e-43
ALS2CL	3.59698838072337e-47	2.46756751272112	0.035	0.009	1.08161440608352e-42
SLC9A3R2	3.90281531825773e-47	1.36328055302388	0.221	0.141	1.1735765662001e-42
AL121821.1	4.01386158581095e-47	3.38968561587648	0.02	0.003	1.20696817885335e-42
POPDC3	4.52443404797063e-47	3.26049099185308	0.011	0.001	1.36049731822477e-42
MAFG	5.58464139492158e-47	1.00705911344776	0.255	0.169	1.67930166745292e-42
SMPDL3A	7.19623774091352e-47	1.7576300978628	0.144	0.078	2.1639086886927e-42
ZNF546	1.32436521885031e-46	2.76803068398186	0.045	0.014	3.98236621308288e-42
MIR34AHG	1.7649381790951e-46	1.74594757414115	0.03	0.007	5.30716910453895e-42
IGHA1	1.80137834839878e-46	8.13230745863509	0.018	0.003	5.41674469363512e-42
CCNE2	1.81261343282832e-46	3.26404106944031	0.021	0.004	5.45052859251475e-42
KCNN4	2.59020123605758e-46	4.6778744154833	0.01	0.001	7.78873511682516e-42
WFIKKN2	2.90952915961006e-46	3.80497454861656	0.01	0.001	8.74895418294744e-42
BICC1	3.04749465479509e-46	1.42024579840347	0.143	0.077	9.16381642696884e-42
BMP6	3.98444273039524e-46	3.16145211919113	0.016	0.002	1.19812192902985e-41
ANKS1B	4.03068064377026e-46	4.25729456680603	0.023	0.005	1.21202566958172e-41
WDR76	4.06409651470023e-46	2.48382745346565	0.035	0.009	1.22207382197036e-41
PPM1N	4.0774554406324e-46	2.22670373522162	0.032	0.008	1.22609085099816e-41
TMEM51	4.49491136545896e-46	1.38586994429254	0.048	0.015	1.35161984759351e-41
PIR	5.04427922450092e-46	3.16785885473442	0.027	0.006	1.51681476280743e-41
FOXD1	5.10648103332631e-46	3.12127898894491	0.018	0.003	1.53551884672122e-41
CKM	5.34859304333552e-46	2.74858751524324	0.017	0.002	1.60832192813099e-41
VLDLR	6.59247657974478e-46	2.93202400178806	0.077	0.033	1.98235770752925e-41
AL121603.2	7.79414183897483e-46	1.5275804766201	0.057	0.021	2.34369845097973e-41
GSTO1	8.06691318999406e-46	1.14137297475484	0.345	0.263	2.42572079623121e-41
ARPC5L	8.34965938629374e-46	1.15648190379566	0.212	0.133	2.51074257745853e-41
COCH	9.34601152062331e-46	3.65203242833542	0.022	0.004	2.81034566425143e-41
TEX29	1.08965623117193e-45	3.05854353276247	0.016	0.002	3.27659628713398e-41
CYP2U1	1.59060421627826e-45	2.34870288275293	0.054	0.019	4.78294687834872e-41
FENDRR	1.6242491195958e-45	3.44913155627666	0.01	0.001	4.88411710262457e-41
NES	1.70353100990711e-45	1.16095892753575	0.18	0.103	5.12251774679067e-41
KCNE4	1.88959904013597e-45	0.806750806026622	0.139	0.073	5.68202431368885e-41
SLC4A8	2.16628407627445e-45	3.47336375767762	0.015	0.002	6.51401621735727e-41
FHL2	2.40193775242811e-45	1.11681190909561	0.349	0.269	7.22262682155132e-41
ISCU	2.44883290467616e-45	0.908247368710794	0.402	0.318	7.36364054436122e-41
HIST1H1E	2.45911968928857e-45	2.01125140212768	0.086	0.038	7.39457290569073e-41
CYLD	2.60298724985524e-45	1.08460499983926	0.248	0.163	7.82718266031471e-41
ARHGAP25	3.14663075234722e-45	3.03519996139784	0.022	0.004	9.46191867230809e-41
AC100793.2	3.14735120502492e-45	1.66918736673952	0.067	0.026	9.46408507350995e-41
CSF2RB	3.54579809362348e-45	3.62972262229751	0.014	0.002	1.06622148675258e-40
CSNK2A2	3.58470203905614e-45	1.34169125369692	0.177	0.104	1.07791990314418e-40
CNN2	3.70981241797564e-45	0.387765866824196	0.172	0.292	1.11554059408528e-40
TNIK	3.80890510442232e-45	2.47275978108659	0.031	0.008	1.14533776489979e-40
MCUB	3.87156070374186e-45	1.62027453048949	0.078	0.033	1.16417830361518e-40
ZNF587B	4.07128294241656e-45	4.33840500735912	0.034	0.009	1.22423478078466e-40
CPXM2	4.71711154885754e-45	3.32967371650781	0.02	0.004	1.41843544274146e-40
MPP4	5.10608386335587e-45	2.80535517250058	0.017	0.003	1.53539941771111e-40
EZR	5.55073018608642e-45	1.16766280179758	0.163	0.093	1.66910456695619e-40
POU3F1	6.6787266205581e-45	2.04476328076216	0.029	0.007	2.00829309480182e-40
RIMS4	8.17458330302543e-45	3.66677421089924	0.01	0.001	2.45809719921975e-40
HYI	8.23849024823385e-45	1.31166557169468	0.208	0.129	2.47731401764392e-40
OSGIN1	8.71981804099644e-45	2.43797874827942	0.028	0.006	2.62204928492763e-40
ASRGL1	9.39222529510542e-45	4.40520693403234	0.035	0.01	2.8242421462382e-40
CLIP4	1.05182476327349e-44	2.05490590404935	0.079	0.034	3.16283706316338e-40
FMNL2	1.11669475179404e-44	2.20119765965817	0.096	0.045	3.35790111864468e-40
GAS6	1.43252782995661e-44	0.839135425040781	0.3	0.209	4.30761118467954e-40
UCP2	1.85683864347717e-44	4.24011275792982	0.029	0.007	5.58351380093584e-40
PABPC1L	2.19557329388948e-44	2.87552042351248	0.056	0.02	6.60208889472567e-40
OASL	2.19679986311302e-44	2.64355625447311	0.016	0.002	6.60577718838086e-40
ZNF267	3.20844033969525e-44	1.27694582817604	0.126	0.065	9.64778010146361e-40
KRT16	3.28170462020427e-44	2.66984767798393	0.02	0.004	9.86808579295423e-40
TG	4.72346599888774e-44	3.46294402209738	0.01	0.001	1.42034622586554e-39
FCHSD2	4.73270979657008e-44	1.75842839741623	0.082	0.036	1.42312583582862e-39
BOD1	5.01843059834309e-44	0.96634010547777	0.261	0.176	1.50904208092177e-39
ZNF800	5.06492393396784e-44	1.2593627730842	0.186	0.112	1.52302262694413e-39
LY96	6.8179881265314e-44	2.34754991972905	0.051	0.018	2.05016902964799e-39
NCKAP1L	7.58857583039786e-44	3.7857090123232	0.013	0.002	2.28188475220064e-39
GRIA2	7.63089627050634e-44	2.58822367198078	0.047	0.016	2.29461050854126e-39
ISG20	8.62907153228273e-44	1.86179493653818	0.072	0.03	2.59476180975742e-39
LAPTM5	1.04847852280716e-43	4.24752724111643	0.027	0.006	3.15277491808113e-39
ARHGEF28	1.28453876737558e-43	3.37594049031941	0.029	0.007	3.86260807349837e-39
UQCRHL	1.30522152984793e-43	2.65588766451875	0.023	0.005	3.92480114025272e-39
CDKN2A	1.6647036047688e-43	1.83784442881212	0.066	0.026	5.0057637395398e-39
CPE	1.84781656798105e-43	0.917010190143536	0.108	0.052	5.55638441991903e-39
PLXNB2	1.87295718047671e-43	2.11268959866934	0.208	0.136	5.63198224169348e-39
MYCBPAP	2.39417866905493e-43	3.24758401114353	0.018	0.003	7.19929525784818e-39
PROSER2	2.50382889277952e-43	3.88619298659889	0.014	0.002	7.52901348058801e-39
IL4R	3.53829613589119e-43	1.80970162759728	0.056	0.02	1.06396564806248e-38
LDB1	3.70556247585477e-43	2.99216985484056	0.112	0.058	1.11426263648953e-38
ORAOV1	3.83732037747731e-43	1.94877403799935	0.044	0.014	1.15388223750743e-38
SYNE3	4.35687503888298e-43	1.96314530088227	0.053	0.019	1.31011232419211e-38
FKBP10	4.7876753426139e-43	1.28245385332576	0.333	0.249	1.439653975524e-38
CACNG8	6.15949075994664e-43	3.17707603802833	0.011	0.001	1.85215887151595e-38
FDXR	8.17188002028448e-43	2.25118183875388	0.062	0.024	2.45728432209954e-38
WIPF3	1.16623378177976e-42	2.4097348391715	0.022	0.004	3.50686498181174e-38
PRRT2	1.20545732936765e-42	2.84210918994289	0.112	0.058	3.62481018940852e-38
CCPG1	1.37067113459915e-42	1.33729015419015	0.236	0.157	4.12160810173965e-38
NT5E	1.42998553017197e-42	1.96328	0.13	0.069	4.29996648922711e-38
HOXD4	1.70981844977951e-42	4.53758023264966	0.026	0.006	5.14142407848699e-38
BX322562.1	2.4807432080939e-42	1.74878906565043	0.031	0.008	7.45959482673836e-38
UBE2E2	2.52924358870584e-42	0.940281715608133	0.204	0.127	7.60543547123845e-38
ITGA10	3.18596281918422e-42	3.14987846422651	0.022	0.005	9.58019019728694e-38
LUCAT1	3.88820545380003e-42	2.19081315300992	0.024	0.005	1.16918337995767e-37
FBXO2	4.46094266888886e-42	2.47112557461672	0.02	0.004	1.34140546053488e-37
AIG1	4.46622772707767e-42	0.950399564117959	0.144	0.079	1.34299467753226e-37
COMP	4.84504786886023e-42	2.35949089164825	0.031	0.008	1.45690589416627e-37
VDR	4.88236312708768e-42	3.10615069526656	0.016	0.003	1.46812659231526e-37
FBXO43	5.12223217348101e-42	3.45192832637454	0.01	0.001	1.54025521456574e-37
GNAL	5.23614257671877e-42	1.41695020041532	0.054	0.019	1.57450807281933e-37
PWWP3A	5.32607411112408e-42	0.289994967580359	0.029	0.102	1.60155048521501e-37
PIK3C2G	5.33499613915621e-42	4.69020912645066	0.019	0.003	1.60423333904427e-37
TRAF1	5.81411707137901e-42	2.44768830473746	0.041	0.013	1.74830500336367e-37
INAVA	8.32217857392019e-42	3.97811781346447	0.01	0.001	2.5024790971778e-37
SLC25A18	9.76632525473185e-42	3.00920961391667	0.012	0.001	2.93673400409787e-37
EMD	1.11480514704748e-41	0.101216150343299	0.097	0.194	3.35221907717177e-37
FAT1	1.25171903373068e-41	0.963410650220747	0.147	0.081	3.76391913442814e-37
LAMB2	1.33374038648863e-41	1.32330660262827	0.269	0.184	4.0105573421713e-37
CRYL1	1.88958963338025e-41	1.96940645869386	0.093	0.044	5.6819960275744e-37
GCLM	1.97900100541236e-41	1.63973244859642	0.106	0.053	5.95085602327498e-37
PITX1	2.05825914610834e-41	2.35137314135563	0.023	0.005	6.18918525234777e-37
MFAP4	2.35485063045879e-41	0.888885578223698	0.307	0.214	7.08103584578957e-37
ELAVL3	2.38125115421383e-41	2.68388864342608	0.017	0.003	7.160422220721e-37
EYA2	2.82987722517265e-41	5.06711734794295	0.017	0.003	8.50944081609415e-37
PATJ	2.84094763358533e-41	3.35670764854654	0.048	0.017	8.54272953419109e-37
SEPT10	3.14664416416764e-41	1.03135646690681	0.165	0.098	9.46195900165209e-37
CGN	3.19544487389651e-41	4.42461588437217	0.01	0.001	9.60870273580681e-37
KLF13	3.69120829774922e-41	0.756073315724328	0.208	0.13	1.10994633513319e-36
CXCR4	4.08593499671664e-41	1.57322929292009	0.083	0.037	1.22864065351269e-36
TDO2	4.218533800534e-41	1.99387048220528	0.028	0.007	1.26851311382057e-36
PAG1	4.44742691380533e-41	0.980148409150932	0.096	0.046	1.33734127298126e-36
RAMMET	4.99606165907152e-41	1.47201213240724	0.103	0.052	1.50231574088281e-36
TMEM163	9.24986127306195e-41	5.65028322441945	0.011	0.001	2.78143328480973e-36
CHMP2B	9.62004013644002e-41	0.920464593822755	0.283	0.201	2.89274606902751e-36
IL6R-AS1	9.68055613307761e-41	2.11970256021924	0.02	0.004	2.91094322921644e-36
GAD1	1.05193787558288e-40	4.06110290316586	0.011	0.001	3.16317719187772e-36
RNF145	1.27249005823889e-40	1.12632233877335	0.192	0.12	3.82637760512434e-36
LGMN	1.31204619848136e-40	1.60201427184543	0.11	0.056	3.94532291883344e-36
MB21D2	1.34452452115137e-40	2.37007289810585	0.035	0.01	4.04298523510217e-36
BRIP1	1.42696204331078e-40	3.58354056017188	0.013	0.002	4.29087486423552e-36
MATN3	1.73355103863719e-40	2.11854963736597	0.02	0.004	5.21278797318202e-36
PDK4	1.77624644125777e-40	2.08193812025502	0.106	0.054	5.34117304886211e-36
FMN2	1.86630973247082e-40	3.06859454607201	0.013	0.002	5.61199336553976e-36
UBL3	1.94384682454583e-40	1.17733281516895	0.33	0.247	5.84514740140931e-36
RHOBTB2	2.01117520694717e-40	2.66332844513465	0.046	0.016	6.04760384729015e-36
AMOTL1	2.22931202793501e-40	1.75390903450441	0.112	0.058	6.70354126800058e-36
GBP5	2.28474278673467e-40	4.0549925296041	0.01	0.001	6.87022155971115e-36
TGFBR2	2.42602745955799e-40	1.98439227935291	0.148	0.086	7.29506457089088e-36
PITPNC1	2.44090895915029e-40	1.69760768495462	0.09	0.042	7.33981324016494e-36
AC137630.2	2.68517052607369e-40	2.82175634203399	0.015	0.002	8.07430777190358e-36
REEP3	3.03827092053086e-40	0.9532491365858	0.276	0.192	9.13608065803628e-36
TTC32	3.55564346871168e-40	1.44568944076088	0.081	0.037	1.0691819910416e-35
AC090673.1	3.81964601804016e-40	3.70393499627653	0.01	0.001	1.14856755762468e-35
RALGPS1	4.06991583792519e-40	2.96363733133431	0.031	0.009	1.22382369246411e-35
TLK1	4.12344488100754e-40	1.60452754889508	0.204	0.132	1.23991987571897e-35
WISP1	4.38345769297865e-40	1.95270078927045	0.039	0.012	1.31810572827868e-35
CH25H	4.64405408228076e-40	0.87063216316955	0.066	0.027	1.39646706254183e-35
DAP	5.69627938422181e-40	1.99797288048426	0.18	0.113	1.7128712108355e-35
AC104794.2	6.03819134371563e-40	2.54173736655742	0.036	0.011	1.81568413705529e-35
F2RL2	6.63957453763388e-40	3.53074577490084	0.026	0.006	1.99652006346651e-35
ZNF676	7.12884354512187e-40	2.81256086305367	0.03	0.008	2.14364325401815e-35
RNF169	7.56763317214275e-40	1.35084974850555	0.155	0.09	2.27558729486333e-35
AC131212.1	7.63102065720283e-40	2.70656345081307	0.012	0.002	2.29464791162089e-35
AL357054.4	8.05033440720734e-40	2.35115479759996	0.018	0.003	2.42073555624725e-35
SOX17	8.71710581474121e-40	4.01883748768609	0.028	0.007	2.62123371849268e-35
VIL1	8.77506146315501e-40	2.80242314084782	0.013	0.002	2.63866098197071e-35
TMEM116	1.31343898478515e-39	2.58543093918639	0.05	0.018	3.94951102724895e-35
CERT1	1.36484855499739e-39	0.31979731108706	0.024	0.091	4.10409960487715e-35
SGCD	1.38352004167348e-39	2.89663732260055	0.041	0.013	4.16024476531216e-35
CNTN2	1.47187480873905e-39	3.34891715491218	0.011	0.001	4.42592754987833e-35
ZNF365	1.59109467642136e-39	2.68264431333389	0.015	0.002	4.78442169199902e-35
CLN8	1.86503987126299e-39	0.983302798885414	0.155	0.09	5.60817489288781e-35
FBXL17	2.12980837086648e-39	2.32381351879511	0.08	0.036	6.4043337711955e-35
NFIX	2.22278214128275e-39	1.76749208084284	0.203	0.131	6.68390589883724e-35
GAS7	2.45838377470577e-39	2.45503142458947	0.126	0.07	7.39236001054026e-35
FKBP2	2.53587453489223e-39	0.423257885292954	0.385	0.276	7.62537472642093e-35
SERTAD4	2.55608930352787e-39	2.52706345095572	0.028	0.007	7.68616053570831e-35
PPARG	2.81565316395171e-39	4.52483665326795	0.014	0.002	8.46666906400281e-35
DAND5	3.06124029025099e-39	3.94567045876259	0.01	0.001	9.20514955278472e-35
HESX1	3.16481602956629e-39	3.00130845799742	0.014	0.002	9.51660180090583e-35
ETV1	3.46281004629705e-39	1.08492803471055	0.086	0.04	1.04126698092152e-34
SLC25A45	5.01684317014225e-39	1.99916235039079	0.042	0.014	1.50856474126177e-34
REEP5	5.10209223243391e-39	0.813122630150898	0.409	0.334	1.53419913429288e-34
ATP5S	6.17456100232268e-39	1.64135740439451	0.068	0.029	1.85669049339843e-34
SEC11C	7.9659441769871e-39	1.3394133826638	0.174	0.106	2.39535941402002e-34
CYP4V2	8.38294657962929e-39	2.83137312991942	0.058	0.023	2.52075203649453e-34
POLR1D	9.0775376044836e-39	0.922353306666262	0.391	0.313	2.72961555766822e-34
CXCL8	9.72023825357857e-39	1.96390054065236	0.333	0.234	2.92287564285108e-34
CEP250	1.13435389235216e-38	2.31261378865939	0.061	0.025	3.41100215430295e-34
IL32	1.24568392366744e-38	1.35327983262355	0.259	0.186	3.74577155846799e-34
TMEM136	1.37357320051261e-38	1.78595765821245	0.056	0.022	4.1303346139414e-34
ARHGEF37	1.66897667976945e-38	3.21588081009049	0.02	0.004	5.01861287606674e-34
AP001267.2	1.88528470033268e-38	3.27037949411915	0.01	0.001	5.66905109390038e-34
AES	2.01341358703699e-38	0.4623570391963	0.326	0.225	6.05433465622024e-34
UBE2M	2.22756710573272e-38	0.866062452238247	0.255	0.175	6.69829428693828e-34
ING2	2.5094325169648e-38	1.43685481805634	0.113	0.059	7.54586357851315e-34
TNFRSF11A	3.41505024901977e-38	3.99356222145875	0.011	0.001	1.02690560988025e-33
URI1	3.4250755922895e-38	1.33041697899933	0.229	0.154	1.02992023060145e-33
PCSK6	3.86924314018144e-38	3.19930998788081	0.026	0.007	1.16348141225256e-33
DKK2	4.26921415113286e-38	1.96977860692766	0.024	0.006	1.28375269524565e-33
AC110769.2	4.28772627387793e-38	1.84153489129896	0.031	0.009	1.28931929055509e-33
AL137026.1	4.37614065558482e-38	1.9344640386968	0.024	0.005	1.31590549513436e-33
ECM1	4.68081318756528e-38	1.15716081593043	0.395	0.31	1.40752052550088e-33
TAGAP	4.85477080783433e-38	3.46351510207103	0.016	0.003	1.45982958191578e-33
MSANTD3	4.88206727953866e-38	1.15319279713443	0.201	0.132	1.46803763095728e-33
PIF1	5.62242201763955e-38	2.27802986098823	0.03	0.008	1.69066230070421e-33
MAP3K11	6.10850347521287e-38	2.36847865758575	0.082	0.039	1.83682699499651e-33
TMEM236	6.14463516262491e-38	3.55852423710231	0.01	0.001	1.84769179340131e-33
SERPINA5	8.01709835755704e-38	4.88272104581021	0.014	0.002	2.4107414761174e-33
COL22A1	8.36996340513841e-38	2.76041795153343	0.013	0.002	2.51684799592512e-33
TMEM56	8.93007291800487e-38	2.76702430146189	0.017	0.003	2.68527292644406e-33
ZNF493	9.40753164136387e-38	2.32646529325526	0.12	0.066	2.82884476455811e-33
IDI2-AS1	1.00059307763761e-37	2.82124844312229	0.015	0.003	3.00878338445631e-33
AP003716.1	1.03797204826311e-37	2.36320879330414	0.033	0.01	3.12118194912718e-33
AP001830.1	1.05900908146595e-37	2.98123712534439	0.011	0.001	3.18444030796811e-33
TOMM34	1.18871251271655e-37	1.67622111560638	0.07	0.03	3.57445852573867e-33
PLA2G4C	1.72543049489476e-37	1.88325953616979	0.08	0.037	5.18836949814855e-33
FGF2	1.8982609957249e-37	1.12484488965369	0.235	0.161	5.70807081414479e-33
GNAQ	2.23963342357831e-37	0.382962633492658	0.141	0.243	6.73457770469998e-33
RAB11FIP4	2.33640501574935e-37	3.8894088931333	0.013	0.002	7.0255698823583e-33
AC008397.2	2.7121120193431e-37	3.23687297225798	0.014	0.002	8.15532084216471e-33
IL27RA	2.86448092985024e-37	2.13190552163389	0.034	0.01	8.61349415605967e-33
RAB39B	3.08345293263925e-37	2.35052066604648	0.019	0.004	9.27194296844622e-33
ACHE	3.13922814922759e-37	1.74682295104147	0.049	0.018	9.43965904472737e-33
SPATA18	3.72908419859905e-37	3.91355095154001	0.021	0.005	1.12133561851873e-32
TNFSF12	3.78674310993221e-37	1.47336624218411	0.143	0.083	1.13867365315661e-32
AC017083.1	3.7972271140162e-37	1.77388989363621	0.034	0.01	1.14182619318467e-32
AC016596.1	3.91411136790631e-37	2.29960540708339	0.024	0.006	1.17697328832943e-32
HES4	5.09666178822202e-37	1.2114540242012	0.206	0.138	1.53256619971836e-32
FICD	5.53293063430798e-37	1.54456	0.084	0.04	1.66375224173641e-32
ZMAT3	5.69655906664099e-37	1.9333367570024	0.113	0.061	1.71295531133895e-32
PTGER3	6.33497916414174e-37	2.49369898347611	0.075	0.034	1.90492823465742e-32
PDGFC	6.54657896097943e-37	1.24121434572189	0.171	0.103	1.96855629356651e-32
MBNL1-AS1	6.67958355255183e-37	1.16216320081179	0.057	0.023	2.00855077425233e-32
FAM162A	6.75125825174855e-37	1.17808194687866	0.186	0.117	2.03010335630079e-32
EPCAM	6.94889679608236e-37	2.95827064286109	0.048	0.018	2.08953326658197e-32
CIITA	7.08802497608397e-37	4.85615364724227	0.011	0.001	2.13136911030845e-32
TNFRSF10B	7.12539902316304e-37	1.26069051760947	0.156	0.093	2.14260748626513e-32
SRFBP1	7.85581957859441e-37	1.05823683025307	0.191	0.122	2.36224494728334e-32
SERTAD4-AS1	8.03652082643071e-37	1.38455505625217	0.055	0.022	2.41658181250771e-32
BOD1L1	8.66930233597801e-37	0.786121302991899	0.337	0.256	2.60685921242859e-32
SNX3	9.02834851761069e-37	0.642267162128653	0.522	0.476	2.71482439924553e-32
TMEM248	9.53845282450424e-37	1.49794390322755	0.247	0.173	2.86821276432843e-32
C19orf70	1.03672364378165e-36	0.719965686998701	0.223	0.147	3.11742799685142e-32
ESYT2	1.04495983891354e-36	2.26814738113885	0.146	0.088	3.14219423561302e-32
P4HTM	1.09523861412121e-36	1.47258828593932	0.167	0.103	3.29338251266247e-32
CPEB1	1.11528258815307e-36	2.59676652814002	0.034	0.01	3.35365474257627e-32
AL355388.2	1.3444479741125e-36	2.82323461111848	0.013	0.002	4.04275505815628e-32
BEND7	1.38230017107245e-36	1.74739400358566	0.053	0.02	4.15657661441487e-32
DDAH1	1.63874291249938e-36	1.66688831095762	0.082	0.039	4.92769993788565e-32
KAZALD1	1.87324298212255e-36	2.7523441431751	0.037	0.012	5.6328416472425e-32
AHSP	1.95923218948753e-36	3.01875147468661	0.01	0.001	5.89141119378901e-32
SGK494	2.27679329992288e-36	3.03382829856353	0.014	0.002	6.8463174528681e-32
LURAP1L	2.48028728849952e-36	1.08415920411474	0.054	0.021	7.45822387651806e-32
SCG2	2.64206043525245e-36	2.32836981845398	0.011	0.001	7.94467572880411e-32
TRIM9	3.30894882902191e-36	3.95410658720254	0.016	0.003	9.95000912886888e-32
RNASE4	3.32053532480191e-36	0.422140679811663	0.026	0.09	9.98484972167935e-32
HIF3A	3.49348392080792e-36	3.33876833933901	0.034	0.01	1.05049061498694e-31
BEX4	4.1901216410778e-36	1.04922769382351	0.259	0.181	1.25996957747209e-31
AAED1	4.24933749824865e-36	1.17156608558651	0.122	0.068	1.27777578572337e-31
FIBIN	4.3151357272107e-36	2.95281393926317	0.022	0.005	1.29756131317226e-31
HOXA7	5.33462439870642e-36	1.69115120798503	0.041	0.014	1.60412155669102e-31
C15orf59-AS1	5.82571536929815e-36	3.32986848895883	0.01	0.001	1.75179261154795e-31
INPP5B	5.91222389032103e-36	3.3898331958699	0.059	0.025	1.77780572381954e-31
CD3G	6.24499028177205e-36	3.63803113559786	0.011	0.001	1.87786857772885e-31
AL445183.2	6.75306123514904e-36	1.83537627722332	0.026	0.007	2.03064551340932e-31
COL5A3	7.99945624186263e-36	2.86636869895528	0.11	0.061	2.40543649192809e-31
PHAX	9.20858577602274e-36	1.02829805226812	0.204	0.132	2.76902174285004e-31
CXCL3	9.21193037986259e-36	1.48994249626281	0.138	0.08	2.77002746522468e-31
PCDHB7	1.12036617183181e-35	3.14126164594627	0.037	0.012	3.36894107869826e-31
GLI3	1.16784434525081e-35	3.45444084172392	0.095	0.05	3.51170794616917e-31
GATA3	1.18070633286513e-35	1.91706288780805	0.024	0.006	3.55038394292546e-31
IFI44	1.19940162158773e-35	2.50807623635202	0.053	0.021	3.60660067611431e-31
PRDM8	1.25874482323319e-35	2.77709644961375	0.053	0.021	3.78504568346219e-31
GPR160	1.52415625846176e-35	5.06892323625182	0.016	0.003	4.58313786919452e-31
KLK4	1.58742836104912e-35	1.45782048386234	0.046	0.017	4.7733970816747e-31
LINC01521	1.80369696310945e-35	2.19345807090245	0.017	0.003	5.4237167680701e-31
BATF	1.85555939365162e-35	3.6419554916675	0.011	0.001	5.57966709671042e-31
LACTB2-AS1	1.85638765459608e-35	2.97392645637081	0.011	0.001	5.58215767737041e-31
ZNF728	2.08817109888128e-35	3.00378569226838	0.012	0.002	6.279130494336e-31
UPB1	2.1850241101229e-35	2.62674775723205	0.012	0.002	6.57036749913956e-31
SDC4	2.27076980079598e-35	1.17769474565581	0.172	0.106	6.8282047909935e-31
AK4	2.50488595556072e-35	2.84438314464395	0.036	0.012	7.53219206837108e-31
NAP1L2	2.74263024544685e-35	2.22783034041723	0.021	0.005	8.24708914805868e-31
TAPBPL	3.54214822606047e-35	1.90666563733445	0.068	0.03	1.06512397157638e-30
DESI2	3.82743989608076e-35	1.03179818317554	0.231	0.159	1.15091117675149e-30
EPHA7	4.08013590367229e-35	3.26540724443542	0.041	0.014	1.22689686623426e-30
PRNP	4.22022348125898e-35	0.895469664803689	0.429	0.355	1.26902120081458e-30
PEA15	4.23887627333751e-35	1.10022627770528	0.279	0.203	1.27463009539259e-30
PSAT1	4.2681085040321e-35	4.51440812488804	0.013	0.002	1.28342022716245e-30
HRCT1	4.29389868389984e-35	2.37964365278156	0.016	0.003	1.29117533424868e-30
PHF1	5.00170254459429e-35	1.54414911688182	0.194	0.128	1.5040119551595e-30
ZNF256	5.25269792264597e-35	3.23029853343251	0.021	0.005	1.57948626533964e-30
CMPK2	5.54091785806365e-35	3.01379073852317	0.017	0.003	1.66615399991974e-30
ABCB1	6.48540774715264e-35	2.48517430826544	0.015	0.003	1.9501621095688e-30
PBX2	6.63099400200973e-35	2.76131024119869	0.11	0.061	1.99393989640432e-30
USP51	7.07160284726969e-35	1.52187483464908	0.066	0.029	2.126430976174e-30
RIMS2	7.44807370624054e-35	3.83712643455054	0.017	0.003	2.23963576346653e-30
RUNX1	7.53408699025968e-35	1.24450122524644	0.153	0.093	2.26549995797109e-30
PCMTD1	7.54739819001073e-35	1.08863365823234	0.354	0.278	2.26950263573623e-30
ELF3	8.24566971547199e-35	2.27172194125891	0.037	0.012	2.47947288344243e-30
CLIC6	8.35216672154387e-35	2.57875767257801	0.018	0.004	2.51149653316824e-30
OLFM1	9.42655069178699e-35	1.09101479587221	0.074	0.034	2.83456379302035e-30
ENO2	9.97857516780041e-35	2.85728410182807	0.047	0.018	3.00055755295758e-30
RELB	9.99641825756101e-35	1.08796181166785	0.159	0.097	3.0059229700486e-30
TRPC1	1.10290644624049e-34	2.3485234383389	0.084	0.041	3.31643968384514e-30
LY6H	1.21158431365258e-34	5.03163354129302	0.01	0.001	3.64323403115331e-30
LEMD2	1.37605213217564e-34	2.00472115136846	0.091	0.046	4.13778876145216e-30
TMEM159	1.56653956465321e-34	1.35022850979629	0.146	0.086	4.71058447091221e-30
MCTP2	1.57777494334118e-34	1.93079855136095	0.048	0.018	4.74436925462694e-30
MALINC1	1.95380156573424e-34	1.37808836192096	0.033	0.01	5.87508130816285e-30
ZMAT1	1.99565382329195e-34	1.55056792656353	0.062	0.027	6.0009310466389e-30
FOXF2	2.3100168205403e-34	2.00516174502578	0.017	0.003	6.94622057936468e-30
GPATCH2L	2.4997161638627e-34	1.33454838925135	0.26	0.186	7.51664650473513e-30
FAM129A	2.57977661786613e-34	1.51245616649957	0.032	0.01	7.75738828992346e-30
USP18	2.87990906323191e-34	2.6896814119942	0.029	0.008	8.65988655313834e-30
AC114490.3	3.06766388418922e-34	2.98862209638867	0.015	0.003	9.224465299757e-30
ABCA9	3.41929718086239e-34	2.19026874820998	0.068	0.031	1.02818266228532e-29
AC013394.1	3.5981887282902e-34	1.99311484195561	0.05	0.02	1.08197535059686e-29
FAM110B	3.67048755305974e-34	2.3659010060633	0.1	0.053	1.10371560720506e-29
ERLEC1	3.71845271101688e-34	1.12999779945137	0.31	0.235	1.11813873020277e-29
MMP23B	4.41797863417823e-34	1.58637002610097	0.078	0.037	1.32848617529739e-29
NPAS3	6.00584624731136e-34	3.40449464289778	0.038	0.013	1.80595796656653e-29
SEPT6	6.21247330170153e-34	1.52584163121718	0.065	0.029	1.86809072182165e-29
CCSAP	6.78427949914708e-34	1.87522585939304	0.037	0.012	2.04003284539353e-29
TUBA4A	8.87498769386778e-34	1.75564591070288	0.029	0.009	2.66870879954604e-29
ACSL3	8.90483784167451e-34	1.28434777656185	0.193	0.126	2.67768473899153e-29
DNAJC3-DT	9.02290774752706e-34	1.28116223175808	0.054	0.022	2.71318835968139e-29
CCDC9B	9.54922876345744e-34	4.10247387194292	0.015	0.003	2.87145308917165e-29
CDK14	1.11138522433295e-33	1.61208295777147	0.134	0.079	3.34193536956918e-29
BLOC1S4	1.13826535936205e-33	1.24288100446276	0.117	0.065	3.42276393560169e-29
ZBTB16	1.2687088273572e-33	0.624965362155307	0.094	0.181	3.81500744386309e-29
FAM193B	1.35236681759968e-33	2.82394170629994	0.087	0.045	4.06656702052225e-29
LINC01842	1.56244409441266e-33	2.96480317270915	0.011	0.002	4.69826939189888e-29
CCDC144NL	1.56434203484721e-33	2.12239493947366	0.022	0.005	4.70397649878556e-29
RYR1	1.84432852268383e-33	2.23858247072136	0.016	0.003	5.54589586771028e-29
PDCD7	1.8513972989687e-33	1.07485656487189	0.214	0.145	5.56715167799889e-29
NSD3	1.98104428288073e-33	0.780017608892305	0.318	0.241	5.95700015862236e-29
PSMD6	2.12562113715128e-33	0.986976292459186	0.217	0.148	6.39174275941391e-29
BCL7C	2.1555680999489e-33	1.15749642998995	0.251	0.179	6.48179327654635e-29
BFSP1	2.27704410587412e-33	2.58557502421728	0.018	0.004	6.84707162636349e-29
ARHGEF6	2.62977102364981e-33	2.85540153379138	0.033	0.01	7.90772146811497e-29
NRIP3	2.78815393649024e-33	1.75728227204483	0.058	0.025	8.38397888702615e-29
NR1D1	2.82941863050055e-33	1.46237878262847	0.132	0.076	8.50806182191516e-29
ISYNA1	3.00903726711463e-33	0.90263913886958	0.169	0.105	9.0481750622137e-29
WAC-AS1	3.26341295952898e-33	0.976937752611021	0.117	0.065	9.81308276930364e-29
FGF12	3.44779169255433e-33	1.89000482882787	0.028	0.008	1.03675096195109e-28
SAP30	3.60685160500026e-33	1.39994079322484	0.116	0.065	1.08458027762358e-28
PURA	3.62523365064829e-33	0.757071324065864	0.341	0.265	1.09010775874994e-28
VAMP2	3.75376101842445e-33	0.937459692562485	0.343	0.27	1.12875593824023e-28
TM9SF3	4.39514459688428e-33	1.33977684775809	0.391	0.324	1.3216199802831e-28
SLC16A9	4.42591341382809e-33	1.58943842129666	0.051	0.02	1.33087216353811e-28
ADRA2A	5.23908894570905e-33	1.18621550684046	0.101	0.054	1.57539404597471e-28
KIFC3	5.51998019586261e-33	1.33774490035392	0.069	0.031	1.65985804489589e-28
AMN	7.4492754247348e-33	2.8518201498915	0.012	0.002	2.23999712021775e-28
OS9	8.53994960614851e-33	1.42240498184215	0.339	0.268	2.56796284656886e-28
LINC00891	8.79867613737576e-33	1.62782043690525	0.019	0.004	2.64576191450889e-28
PTPRJ	1.06731906403951e-32	2.5249306636609	0.028	0.008	3.2094284255668e-28
TBC1D9B	1.1053982800564e-32	2.53813068537416	0.128	0.077	3.3239326281296e-28
AP002884.1	1.10999986221048e-32	2.28565735024047	0.023	0.006	3.33776958566693e-28
KIF13B	1.12198344853151e-32	1.91068425030155	0.062	0.027	3.37380422973426e-28
ARNTL2	1.195665514117e-32	3.30852932250883	0.011	0.001	3.59536620094983e-28
AL354920.1	1.21220614978468e-32	2.43040328584422	0.016	0.003	3.64510389240253e-28
SAA1	1.39397696972245e-32	4.10206006701438	0.011	0.001	4.1916887479554e-28
SLC25A33	1.60019054742135e-32	1.22058993007418	0.158	0.098	4.81177297609599e-28
AFDN	1.74289288296897e-32	1.4252852459997	0.166	0.105	5.24087889908768e-28
CSAD	2.05830472052042e-32	1.84482536138522	0.142	0.087	6.18932229460491e-28
SYPL1	2.07264373699175e-32	0.786671074811112	0.342	0.267	6.23243971713418e-28
IL10RB	2.25475890141992e-32	0.223279770440963	0.024	0.079	6.78006001656969e-28
LINC01118	2.26456954659898e-32	2.64589357143463	0.01	0.001	6.80956062662314e-28
CLEC2D	2.41643992244189e-32	2.54732386746618	0.066	0.03	7.26623484678275e-28
APOL2	2.84689960955467e-32	2.84824929287576	0.073	0.035	8.5606271259309e-28
SUPV3L1	2.97119882172121e-32	1.58485356227954	0.094	0.049	8.93439485691569e-28
HTATIP2	3.1554159459053e-32	1.47089324986993	0.057	0.024	9.48833574933725e-28
FN3K	3.33005866889633e-32	3.1962314693536	0.028	0.008	1.00134864173713e-27
IKZF3	3.47137462873525e-32	3.53973081562159	0.014	0.002	1.04384235086069e-27
CDK6	3.54560596796085e-32	0.739086058160239	0.17	0.105	1.06616371456583e-27
KLHL5	3.69224430349551e-32	1.66500007878846	0.088	0.045	1.1102578620611e-27
INO80	3.79771265692759e-32	1.61108717160842	0.099	0.053	1.14197219593813e-27
NEUROD2	3.79801582660227e-32	3.32221948855824	0.012	0.002	1.1420633590593e-27
RAB14	4.01362487598613e-32	0.844646401681886	0.345	0.268	1.20689700020903e-27
TMEM123	4.03163843661845e-32	0.858949405017722	0.234	0.16	1.21231367789117e-27
ZNF322	4.28361103393264e-32	1.10315939052887	0.158	0.099	1.28808183790355e-27
AL021453.1	4.60643278862825e-32	2.48031304683057	0.024	0.006	1.38515433954051e-27
VAMP8	4.85395786129455e-32	2.87465034835112	0.037	0.013	1.45958512889127e-27
SEZ6	5.75417724332207e-32	3.46759207113766	0.01	0.001	1.73028109706695e-27
NSMCE3	7.93793402129623e-32	1.18525644622184	0.133	0.079	2.38693676020378e-27
PAFAH1B1	8.37336721362067e-32	0.940101051749567	0.353	0.278	2.51787152113574e-27
PIK3IP1	8.63711769513476e-32	2.16039291766715	0.07	0.033	2.59718129092702e-27
ZNF556	8.94530720211352e-32	2.38503692108603	0.024	0.007	2.68985387567553e-27
SURF1	9.48624948016161e-32	1.26677035593443	0.174	0.112	2.8525152186846e-27
SCNN1A	1.01210133599519e-31	4.15203212223091	0.016	0.003	3.04338871733755e-27
TSPAN5	1.12565272022095e-31	0.953044903259847	0.201	0.135	3.38483772970441e-27
ARL6IP5	1.23330540744631e-31	0.87036858539265	0.347	0.271	3.70854936019105e-27
KLHDC2	1.31363938730332e-31	1.63824739945722	0.204	0.141	3.95011363762107e-27
IDI2	1.32062541119103e-31	3.2045639879608	0.01	0.001	3.97112061145144e-27
PHC2	1.42120953355007e-31	1.04229647794801	0.243	0.173	4.27357706738506e-27
EFEMP2	1.44468890762115e-31	0.920252208830049	0.406	0.347	4.3441795452168e-27
ARHGAP22	1.51662714795199e-31	2.12660471912036	0.028	0.008	4.56049783389162e-27
SHE	1.55812088951258e-31	2.75526466039808	0.013	0.002	4.68526951476433e-27
FOXO3	1.98568159729766e-31	1.44008992261252	0.227	0.158	5.97094456307405e-27
GPC4	2.07399704840231e-31	2.78920515157972	0.037	0.013	6.23650912454573e-27
ZNF582-AS1	2.21379344525988e-31	1.72902363028134	0.027	0.008	6.65687688989645e-27
PLAAT4	2.26498568830941e-31	0.238350668027675	0.019	0.071	6.81081196474639e-27
CD22	2.39210317826158e-31	4.17920659726351	0.018	0.004	7.19305425703259e-27
GOSR2	2.59809567736265e-31	2.16182216357402	0.161	0.104	7.81247370182949e-27
DDX17	2.62784296134054e-31	0.111704499983205	0.501	0.64	7.901923784751e-27
FUT6	2.68085457404009e-31	3.4092861681831	0.01	0.001	8.06132970413856e-27
NEB	3.4678738331061e-31	2.45682669043137	0.015	0.003	1.04278966161501e-26
PPP1R3F	3.9343703735549e-31	2.73850712705451	0.029	0.009	1.18306517132796e-26
CYSLTR1	4.40445920662344e-31	4.34105369447245	0.011	0.001	1.32442088343167e-26
NTN4	4.43210649844665e-31	1.77306838454281	0.038	0.014	1.33273442408291e-26
GALNT16	4.54860714617322e-31	2.81057877873955	0.025	0.007	1.36776616885429e-26
LRRN3	4.90294747049347e-31	3.76533399784933	0.012	0.002	1.47431630437739e-26
SPART	5.08577755988126e-31	1.13607172335394	0.299	0.229	1.52929331225629e-26
KCNN1	5.36001299741196e-31	2.39115294906568	0.016	0.003	1.61175590832178e-26
MRC2	7.45125861673223e-31	1.70512596186602	0.244	0.177	2.24059346605138e-26
EFEMP1	7.92953085464362e-31	0.51984128950478	0.137	0.232	2.38440992799134e-26
EMB	8.01383091588006e-31	2.96952666330521	0.016	0.003	2.40975895640513e-26
HMCN1	8.24086621919886e-31	1.81676055979475	0.028	0.009	2.4780284721131e-26
CMYA5	9.09396745104055e-31	1.89322382652097	0.072	0.035	2.73455601252789e-26
ODF3B	1.02665535171164e-30	1.93826290413337	0.057	0.025	3.0871526425969e-26
CLIC4	1.2844632266926e-30	0.193366782937089	0.321	0.438	3.86238092266465e-26
OSBPL3	1.47741580201262e-30	2.66038091068689	0.02	0.005	4.44258931665195e-26
IFI44L	1.69177951051367e-30	2.21563401454746	0.034	0.012	5.08718098811462e-26
IKZF2	1.7054824082405e-30	2.51066582625373	0.023	0.006	5.12838560157918e-26
TCN2	1.71273857044243e-30	1.60693184306335	0.073	0.035	5.15020488132039e-26
GNPDA1	1.80686942246967e-30	1.02920178672454	0.141	0.085	5.43325635336629e-26
TACC1	2.27189640267239e-30	0.785707133146152	0.348	0.274	6.83159248283587e-26
AC105760.2	2.31707706160611e-30	3.20191364570781	0.011	0.002	6.96745072424958e-26
ANKAR	3.2459208736447e-30	2.22167375016573	0.057	0.025	9.76048406704961e-26
AC073111.5	3.58036279287375e-30	2.19038973271313	0.021	0.005	1.07661509181714e-25
TRBC2	4.58824586013332e-30	4.10427394526368	0.022	0.006	1.37968553014209e-25
FNDC5	4.63808525905565e-30	2.64469301596224	0.03	0.01	1.39467223739803e-25
BCL2	4.81434968411456e-30	1.5659584774204	0.137	0.084	1.44767495001325e-25
RAB3A	4.86383654156228e-30	2.39766343622596	0.02	0.005	1.46255564804778e-25
RASGRP3	5.02092250658358e-30	2.32046404658156	0.018	0.004	1.50979139772968e-25
SLC41A2	5.03376120849132e-30	2.31460153503167	0.039	0.014	1.51365199539334e-25
AL034549.1	5.16331501852186e-30	2.58225691001313	0.019	0.004	1.55260882606952e-25
FCGR2A	5.25792376607574e-30	2.18743291817406	0.024	0.007	1.58105767645898e-25
MMP1	5.26951251754831e-30	1.91833369750128	0.018	0.004	1.58454241402678e-25
ZNF550	5.38706002933802e-30	2.67933297711227	0.036	0.012	1.61988895082194e-25
EIF3H	6.74404241318206e-30	0.499968843747456	0.568	0.54	2.02793355364385e-25
CDON	7.24799082394965e-30	3.8465609507499	0.022	0.006	2.17947084076166e-25
BEX2	9.0740893248157e-30	0.908826925375872	0.089	0.046	2.72857865997208e-25
MARC2	9.08079484286541e-30	2.95196817280492	0.024	0.007	2.73059500924963e-25
AC087645.2	1.03848145027011e-29	2.64228092359257	0.011	0.002	3.12271372096223e-25
SLBP	1.2435440865347e-29	1.32435259139362	0.156	0.1	3.73933706820983e-25
C1orf198	1.38699385431362e-29	1.44820065536129	0.115	0.066	4.17069051992106e-25
C8orf44	1.46429127236221e-29	2.19094776175094	0.025	0.007	4.40312385599317e-25
AC245140.2	1.47662787329892e-29	1.65262227023576	0.029	0.009	4.44022001500984e-25
SLC6A20	1.64047242362235e-29	3.14219132690204	0.011	0.002	4.93290057783241e-25
NRK	1.66919052445859e-29	4.07645639971656	0.028	0.009	5.01925590704697e-25
NDN	1.99911955773144e-29	0.906302246448308	0.313	0.245	6.01135251009843e-25
IGIP	2.24328783020078e-29	3.10273595405644	0.054	0.024	6.74556650541376e-25
ZNF620	2.4353675117052e-29	2.3010742297807	0.029	0.009	7.32315010769752e-25
AC062029.1	2.73415921006917e-29	2.32562318122013	0.024	0.007	8.22161674467798e-25
MYEF2	2.9187065027533e-29	2.33142849849366	0.035	0.012	8.77655045377919e-25
TMEM185A	3.46963301420783e-29	2.62723295329747	0.08	0.042	1.04331864737229e-24
HES7	3.57347672928253e-29	2.54876914658402	0.011	0.002	1.07454445249526e-24
WASF3	3.61209242748107e-29	2.28645068966459	0.044	0.018	1.08615619294356e-24
TUBD1	3.63142795194574e-29	2.3476020318591	0.06	0.028	1.09197038515008e-24
CSTF3	3.63724084312364e-29	2.1580957800846	0.121	0.072	1.09371832152728e-24
RAB25	4.06509550152427e-29	4.64791052258245	0.011	0.002	1.22237421730835e-24
BAG1	4.40148648799999e-29	1.00808113313048	0.267	0.198	1.3235269869416e-24
RNPC3	4.76033736933431e-29	1.45151439961861	0.115	0.067	1.43143344695883e-24
ABRACL	4.84801352713351e-29	1.84458546514245	0.106	0.06	1.45779766760905e-24
HMGA1	5.69286007618158e-29	1.08508917841941	0.182	0.123	1.7118430249078e-24
P2RX7	5.94420025492336e-29	2.16446103083277	0.028	0.009	1.78742101665545e-24
MPPED2	6.23879190954827e-29	2.06274227462728	0.033	0.012	1.87600472720116e-24
HKR1	7.06469076819769e-29	1.79485440874077	0.038	0.014	2.12435251399704e-24
LMO7	7.24463114543392e-29	1.50332384567078	0.048	0.02	2.17846058543198e-24
COL6A6	7.62735605428108e-29	4.43343673235428	0.017	0.004	2.29354596552232e-24
UTP14C	9.85083746649683e-29	1.6651765047119	0.046	0.019	2.9621468261756e-24
GSPT1	1.02259149816916e-28	0.805235496490413	0.267	0.201	3.07493263499467e-24
PPP1R13B	1.02475405072221e-28	2.33336590654891	0.036	0.013	3.08143543052167e-24
MEIS2	1.03291120694405e-28	2.12829693271765	0.122	0.074	3.10596399928075e-24
PPP1R1B	1.03884840829012e-28	2.97480568176826	0.022	0.006	3.12381716372839e-24
TENM4	1.08464615986053e-28	2.50686433913749	0.035	0.013	3.26153100270061e-24
CCDC84	1.08928969237915e-28	1.35819586793575	0.104	0.058	3.27549410498412e-24
GLRB	1.10203074313544e-28	1.23366515356816	0.054	0.024	3.31380644460828e-24
MAP3K5	1.14279563297252e-28	0.440835414095575	0.066	0.133	3.43638646834837e-24
BCL7B	1.23815272531985e-28	1.17082695651023	0.124	0.074	3.72312524503678e-24
ABCG1	1.2846253944307e-28	2.33863562576943	0.048	0.02	3.86286856105313e-24
SLC25A38	1.32105954894812e-28	1.94561224570471	0.106	0.061	3.97242606368699e-24
CD36	1.34790370953679e-28	2.72514395894978	0.015	0.003	4.05314645457714e-24
ATP6V1B2	1.36496562969213e-28	1.53097208903061	0.131	0.08	4.10445164848424e-24
UBR7	1.45482043449437e-28	1.40780304930898	0.071	0.035	4.37464504652457e-24
CHRNB1	1.60569453832555e-28	1.70125951655583	0.05	0.021	4.82832347674493e-24
FAM241A	1.72198616261167e-28	1.55697684569468	0.057	0.026	5.1780123909733e-24
MYCN	1.85901735530958e-28	3.05810119736002	0.013	0.002	5.5900651874159e-24
FOXF1	1.98435876199022e-28	1.71531684901958	0.027	0.008	5.96696679730459e-24
FAM19A5	1.98665865395025e-28	1.12001087303822	0.11	0.064	5.97388257242839e-24
AC012360.3	2.05462167594484e-28	1.20118920444588	0.067	0.032	6.17824737956612e-24
IDUA	2.28600854364296e-28	2.53049177550197	0.066	0.032	6.87402769073439e-24
IDNK	2.28697657769083e-28	2.38820350382378	0.03	0.01	6.87693856911634e-24
CUBN	2.36922278852417e-28	2.27111153665012	0.025	0.007	7.12425292509217e-24
CCL26	2.63141016685595e-28	0.694623978243633	0.059	0.027	7.91265037173584e-24
CD274	2.66328551270761e-28	2.36146245086307	0.013	0.003	8.00849953671179e-24
KCNMB2	2.74537598336422e-28	4.6664985365676	0.011	0.002	8.2553455819762e-24
RHEX	2.79886886816573e-28	4.57246919794721	0.015	0.003	8.41619868657435e-24
MTSS2	3.03507649178273e-28	3.6431140045843	0.027	0.009	9.12647501079066e-24
PIWIL2	3.10133421428421e-28	2.17437975277235	0.03	0.01	9.32571198235262e-24
WBP2	3.65507801143219e-28	0.932537870740781	0.178	0.117	1.09908195803766e-23
CSF2RA	3.73528321901246e-28	4.47917746765768	0.01	0.002	1.12319966395705e-23
TMEM140	3.97955644674476e-28	2.39689938810722	0.039	0.015	1.19665262353615e-23
HLF	4.11586406667963e-28	1.86817892820655	0.064	0.03	1.23764032485056e-23
C17orf51	4.43642022657716e-28	1.70429970385286	0.039	0.015	1.33403156213175e-23
ENPEP	4.91325721638533e-28	0.753890333062958	0.06	0.127	1.47741644496707e-23
MAP7D2	5.12072538907655e-28	2.99412930215965	0.011	0.002	1.53980212449532e-23
GATM	5.13226599105562e-28	1.88254028911885	0.02	0.005	1.54327238351043e-23
FUCA1	5.22917497219408e-28	2.81028391105419	0.043	0.017	1.57241291413876e-23
NECTIN3	5.47518202871008e-28	1.86159603165415	0.086	0.046	1.64638723603312e-23
ZNRF2	5.51468558157912e-28	2.3821710159733	0.054	0.024	1.65826595438084e-23
SH2B3	6.15479398703085e-28	1.51068449822146	0.043	0.017	1.85074655190018e-23
HCLS1	6.48277782358267e-28	2.9279000891086	0.029	0.01	1.94937129155131e-23
GAST	6.85297948260336e-28	1.86004562816476	0.014	0.003	2.06069093041883e-23
MSL1	6.92326866545498e-28	1.66673110352003	0.199	0.138	2.08182688770231e-23
DCLK2	6.93232256599134e-28	2.29381908681216	0.051	0.022	2.0845493955936e-23
AC124068.2	7.09282739723106e-28	2.50132415476384	0.014	0.003	2.13281319834738e-23
SBF2-AS1	7.25127629900978e-28	1.74156211615182	0.036	0.013	2.18045878311224e-23
PLGLB2	7.39737475831662e-28	4.85582489243251	0.012	0.002	2.22439058982581e-23
MRNIP	7.84004568780469e-28	1.95628204777495	0.123	0.075	2.35750173832287e-23
AC245297.3	8.03031592947295e-28	0.505164790847641	0.13	0.077	2.41471599999252e-23
TMEM109	8.20384162824414e-28	1.19658412053054	0.185	0.125	2.46689517761301e-23
OGFRL1	9.46653209952532e-28	1.21747680906222	0.099	0.055	2.84658620232726e-23
POPDC2	9.87405941573653e-28	2.33869308168858	0.018	0.004	2.96912966631197e-23
ARHGDIB	1.05782120295577e-27	2.15226721464037	0.077	0.04	3.18086835728802e-23
ACVRL1	1.17345797886947e-27	1.65637154854069	0.076	0.038	3.52858814246051e-23
GNG2	1.17927362098611e-27	2.77931389982955	0.043	0.018	3.54607577830525e-23
TRIM36	1.24382916089784e-27	3.11407951427234	0.011	0.002	3.7401942868198e-23
KCNS3	1.30057273773772e-27	2.32693559188754	0.031	0.01	3.91082222237733e-23
ZNF543	1.38056940487073e-27	2.58520248021357	0.023	0.007	4.1513722004463e-23
CTNND1	1.44454431954868e-27	0.383884169433665	0.132	0.217	4.34374476888289e-23
AC239800.3	1.61909223630286e-27	2.60807628243709	0.016	0.004	4.86861035456269e-23
FANCA	1.72651245072246e-27	2.3524349185686	0.024	0.007	5.19162293932244e-23
LY75	1.73014955565353e-27	3.92390029035606	0.013	0.002	5.20255971385015e-23
FBXO44	1.82714471139463e-27	1.96103389715725	0.054	0.024	5.49422414716366e-23
EBPL	1.84670956297868e-27	0.89883075111294	0.232	0.166	5.55305565587689e-23
BSCL2	2.0092433413275e-27	0.311525263528988	0.023	0.073	6.0417947273718e-23
WDR43	2.07819910438632e-27	0.918044255358487	0.219	0.156	6.24914470688965e-23
LRCOL1	2.29216429496524e-27	1.87734385116956	0.016	0.003	6.89253803496047e-23
ZNF90	2.36084029122194e-27	1.67461577886514	0.042	0.017	7.09904675570438e-23
SNRPA1	2.41849231175826e-27	0.917631523760432	0.209	0.147	7.2724063814571e-23
JDP2	2.4196773574183e-27	1.27425480281648	0.105	0.06	7.27596981375683e-23
C1QBP	2.65195991320915e-27	0.784951217436672	0.294	0.228	7.97444345901991e-23
FAS	2.67177619623987e-27	1.20881199176914	0.161	0.105	8.03403102209329e-23
ASNA1	2.75739196887931e-27	0.795015079574324	0.163	0.106	8.2914776504201e-23
SHFL	2.88818002874659e-27	0.35055007816981	0.015	0.06	8.68475734644098e-23
ETV4	2.93922894309632e-27	3.74102045903201	0.014	0.003	8.83826143189064e-23
PFKP	2.97205723661897e-27	1.50371428808992	0.056	0.025	8.93697611051323e-23
YAP1	3.05411085627179e-27	1.14498161231811	0.255	0.19	9.18371134480927e-23
TSPAN15	3.08518064275608e-27	3.72814142862463	0.018	0.004	9.27713819276752e-23
PRKACA	3.11259193747431e-27	2.81074605136263	0.138	0.091	9.35956395598524e-23
PLIN5	3.35457188370716e-27	4.01760362397537	0.01	0.002	1.00871976543074e-22
ZNF596	3.51984678841231e-27	2.06034039455856	0.029	0.009	1.05841792927558e-22
DENND2A	3.65240329493636e-27	1.98644090187367	0.091	0.05	1.09827767078736e-22
SKAP2	3.7976282412523e-27	1.8728412619693	0.032	0.011	1.14194681214457e-22
CPM	3.81292470216069e-27	3.18387060703262	0.04	0.016	1.14654645793972e-22
KAZN	3.95159238640336e-27	1.0057769750476	0.108	0.062	1.18824383059149e-22
PCBD1	4.2084277432777e-27	0.811068381345883	0.271	0.202	1.2654742224036e-22
HIST2H2BF	4.47273925854339e-27	1.34763128163124	0.045	0.019	1.344952695044e-22
ATP6V1C1	4.50446286820477e-27	1.14285683079407	0.165	0.109	1.35449198446917e-22
BTF3L4	4.78639089036597e-27	0.190744908323342	0.225	0.32	1.43926774073305e-22
SLC12A4	4.83508860453641e-27	2.32907268361224	0.117	0.071	1.4539111433841e-22
SYNGR2	4.98778962311356e-27	2.36488739910272	0.061	0.029	1.49982833967025e-22
TSLP	5.45844046877004e-27	1.9021517165726	0.039	0.015	1.64135304895915e-22
IQSEC3	5.50386406184706e-27	2.65023410861409	0.022	0.006	1.65501192339741e-22
PTGS1	6.02081439930069e-27	4.01760329504673	0.01	0.002	1.81045888986972e-22
ZFC3H1	6.16707669375849e-27	0.997476624632536	0.205	0.144	1.85443996181318e-22
NCS1	6.40865037065321e-27	1.13191990487956	0.08	0.042	1.92708116645542e-22
AC124312.1	6.44965248955076e-27	2.3314267812276	0.022	0.006	1.93941050360791e-22
AL121827.2	6.54938186670855e-27	2.50418061449115	0.01	0.002	1.96939912731926e-22
ULBP2	6.60157179293587e-27	2.35299002303916	0.012	0.002	1.98509263813582e-22
PLSCR1	6.66630869006757e-27	1.33259246552884	0.148	0.094	2.00455902310332e-22
CSRP1	7.46706321067411e-27	1.45273178466487	0.448	0.396	2.24534590744971e-22
C3orf52	7.87705890805325e-27	2.26601226606586	0.013	0.003	2.36863161365161e-22
UACA	8.26949645458818e-27	0.995761480924972	0.212	0.148	2.48663758389467e-22
LRG1	8.77456490841002e-27	2.5018171701753	0.011	0.002	2.63851166795889e-22
NAALADL2	8.78134026473519e-27	1.91894579494819	0.076	0.04	2.64054901760587e-22
LCNL1	1.05570973434437e-26	2.77832386105008	0.027	0.009	3.17451917117352e-22
OPTN	1.12991483819382e-26	1.21096185689481	0.207	0.147	3.39765391844881e-22
SLU7	1.16764627326297e-26	0.98717888789087	0.203	0.142	3.51111234370174e-22
SFRP4	1.21591751681253e-26	0.407623696839604	0.638	0.594	3.65626397305528e-22
CAV2	1.26395697658124e-26	0.681911624155341	0.266	0.198	3.80071862857979e-22
PIP5K1C	1.26416021779084e-26	0.256030660790519	0.055	0.115	3.80132977489707e-22
CPNE5	1.32984425642149e-26	4.00557002631683	0.011	0.002	3.99884167905941e-22
DDIT4L	1.44527745845266e-26	1.90606069014025	0.017	0.004	4.34594931756716e-22
LPCAT2	1.4563258045853e-26	1.87432327376422	0.061	0.029	4.37917169438801e-22
NMNAT3	1.52767704571618e-26	2.99208693360296	0.031	0.011	4.59372487646856e-22
FAM83D	1.55742914724845e-26	2.11079457947396	0.017	0.004	4.6831894457761e-22
PLB1	1.66754268614029e-26	3.26726098023098	0.011	0.002	5.01430085722385e-22
TRAPPC2B	1.68399767501846e-26	0.894465867589672	0.084	0.045	5.06378100878052e-22
SNX9	1.7191739686903e-26	0.823992812880014	0.294	0.227	5.16955612385172e-22
MICU3	2.13962003776377e-26	1.27705371364795	0.183	0.126	6.43383745355567e-22
PITPNM3	2.9070822649668e-26	3.65808111267504	0.011	0.002	8.74159637075517e-22
GPCPD1	3.0420623366626e-26	0.274260763043574	0.073	0.138	9.14748144634445e-22
SHC1	3.16069111685114e-26	0.631232423015802	0.164	0.254	9.50419818837136e-22
AC092687.3	3.25906785009204e-26	2.0739524692461	0.023	0.007	9.80001702522677e-22
AC084018.2	3.28324086737571e-26	1.68600139448478	0.031	0.011	9.87270528819877e-22
SH3PXD2B	3.37200464653537e-26	0.291746807020805	0.058	0.118	1.01396179721319e-21
TM9SF1	3.41391163870847e-26	0.574891675485577	0.054	0.114	1.02656322975964e-21
IMMP2L	3.43550665300786e-26	2.61092563988059	0.1	0.059	1.03305685055946e-21
CFAP70	3.81175917666979e-26	2.29634192859671	0.033	0.012	1.14619598442461e-21
LIG1	3.85779336900411e-26	2.13113471626102	0.039	0.015	1.16003846605954e-21
CEBPB-AS1	4.19332128315102e-26	1.94463093030398	0.016	0.004	1.26093170984351e-21
EDARADD	4.23717913114866e-26	2.39748441298689	0.015	0.003	1.2741197647364e-21
SEC61A1	4.52743807591596e-26	0.153307901075613	0.218	0.307	1.36140062942793e-21
OFD1	4.62172418127865e-26	1.5795472455285	0.142	0.091	1.38975246131049e-21
RPP25	5.11011605950657e-26	1.88768500324218	0.03	0.01	1.53661189909363e-21
ADM2	5.18706898218993e-26	3.17748208184636	0.01	0.002	1.55975164294451e-21
NANOS1	5.66281987843193e-26	1.82176187478533	0.027	0.009	1.70280993744448e-21
TSGA10	5.66809025012111e-26	1.98754262258149	0.036	0.014	1.70439473821142e-21
LCA5	6.37709883138012e-26	1.55409911335251	0.072	0.037	1.917593618596e-21
TARID	6.56678377051227e-26	1.82105925735337	0.016	0.004	1.97463187979304e-21
TASOR2	6.82625050295547e-26	0.600273154613618	0.025	0.074	2.05265352623871e-21
HSPA6	7.29445568965246e-26	1.46589588238502	0.325	0.255	2.1934428258785e-21
ZNF106	7.91276330676931e-26	1.0487314701489	0.305	0.239	2.37936792634553e-21
CEBPG	8.06323610149462e-26	1.09494397005766	0.103	0.059	2.42461509571943e-21
IQCJ-SCHIP1	9.14841561430103e-26	1.71950151656538	0.015	0.004	2.75092857522032e-21
HSF4	9.57068828438993e-26	3.51292119001689	0.037	0.015	2.87790596711605e-21
SLC44A3	1.02537964296474e-25	3.13741875248874	0.021	0.006	3.08331658639496e-21
KLK3	1.03210496719348e-25	2.26098456719395	0.011	0.002	3.10353963635079e-21
IL33	1.05903275257636e-25	1.30401680392505	0.105	0.061	3.1845114869971e-21
AC011416.3	1.10513572239265e-25	2.20422562611229	0.014	0.003	3.3231431172347e-21
NPIPB2	1.26880225453126e-25	2.2594110073318	0.015	0.004	3.8152883793755e-21
AL136295.5	1.33475370062512e-25	2.30360532338364	0.025	0.008	4.01360437777975e-21
AL627171.1	1.41280925100614e-25	1.48520454805894	0.042	0.017	4.24831741777547e-21
AC099791.2	1.66731329307588e-25	1.61361569228461	0.025	0.008	5.01361107227918e-21
SQOR	1.67897482436855e-25	1.75608510377316	0.054	0.025	5.04867729687624e-21
CTSD	1.68480043701665e-25	0.68168095120382	0.419	0.358	5.06619491410905e-21
FAM107A	1.72581208769457e-25	2.59225294715588	0.014	0.003	5.18951694769758e-21
CD37	1.73644525673237e-25	2.30465681635569	0.027	0.009	5.22149088699424e-21
CAPN10-DT	1.9762703731702e-25	1.92251139308848	0.028	0.01	5.9426450121228e-21
SULT1C2	1.97717944319224e-25	2.75854713247875	0.01	0.002	5.94537858567907e-21
HIST1H1D	2.15644693125684e-25	2.60356302322889	0.047	0.021	6.48443592228932e-21
SMIM19	2.16092827170934e-25	1.06458951111117	0.167	0.113	6.49791131302998e-21
ZNF24	2.21917339125804e-25	0.94280243373019	0.225	0.161	6.67305438751292e-21
GON4L	2.24270106208045e-25	1.05516872158776	0.206	0.147	6.74380209367591e-21
UTP6	2.30269900034792e-25	1.10810880534155	0.153	0.1	6.9242158940462e-21
MAFA	2.31801330605973e-25	2.59971550755473	0.014	0.003	6.97026601132161e-21
COL18A1	2.58832876713454e-25	1.00122733993232	0.341	0.276	7.78310460277356e-21
WHAMM	2.77396864538614e-25	1.35507121671323	0.095	0.054	8.34132371667612e-21
INMT	2.80814709536827e-25	1.37861599472144	0.024	0.007	8.44409831577238e-21
RPL5	2.89215634174425e-25	0.297413961137369	0.713	0.955	8.69671411962497e-21
AC092807.3	3.05744009334027e-25	0.953404508944103	0.053	0.024	9.19372236067421e-21
DLC1	3.23076659268336e-25	0.823249616486737	0.242	0.175	9.71491514419886e-21
Z84485.1	3.32856821805007e-25	2.26957501376005	0.016	0.004	1.00090046316766e-20
SCARB2	3.34039684499985e-25	0.974763375191666	0.315	0.248	1.00445733129146e-20
HIST1H1A	3.65237922185979e-25	1.74066687082119	0.03	0.011	1.09827043201324e-20
BCL7A	3.79640799717847e-25	1.23944033688666	0.074	0.039	1.14157988475157e-20
SORCS2	3.79711639606431e-25	3.7099220412156	0.024	0.007	1.14179290029654e-20
TRMT2B	3.90999093008825e-25	3.48002978766212	0.026	0.009	1.17573427267754e-20
EMC4	3.96038075163208e-25	1.13811723470166	0.275	0.212	1.19088649201577e-20
MMP25	4.11150704885191e-25	2.28949305126769	0.019	0.005	1.23633016958977e-20
LY6G5B	4.14766695492477e-25	3.80539859315186	0.034	0.013	1.24720345334588e-20
ARHGAP29	4.38019612541437e-25	0.775272936180325	0.083	0.045	1.3171249749121e-20
CTU1	4.76647108991773e-25	1.24710564209344	0.074	0.039	1.43327785673826e-20
ZNF563	5.21080590383356e-25	2.28803403076519	0.024	0.008	1.56688933528275e-20
GTF2H1	5.28555401475645e-25	1.55470147800317	0.129	0.081	1.58936609223727e-20
LAT2	5.67868201773505e-25	2.67236869834569	0.014	0.003	1.70757968273293e-20
ACTR3C	6.00260396641957e-25	2.1484491825753	0.014	0.003	1.80498301270236e-20
STC2	6.14188702581704e-25	1.39543397548758	0.015	0.003	1.84686542866318e-20
EGLN2	6.23624219701747e-25	0.694443431065515	0.026	0.074	1.87523802864315e-20
SLC2A9	6.69457889885818e-25	3.05983220015625	0.017	0.004	2.01305987488665e-20
FHOD3	6.99305759853275e-25	1.33323160277473	0.053	0.025	2.1028124198788e-20
SFMBT1	7.1753604202857e-25	1.93658547942979	0.03	0.011	2.15763087837991e-20
KLHL36	7.25368717446883e-25	1.13019850110261	0.103	0.06	2.18118373336278e-20
PSMB10	7.46570289918594e-25	0.229983858397841	0.044	0.098	2.24493686178521e-20
SPRY1	7.70455138067217e-25	1.77652708514894	0.211	0.156	2.31675860016812e-20
EID3	8.30179837061092e-25	1.68169700512314	0.061	0.03	2.4963507700427e-20
RAB1B	9.07128054979072e-25	0.268368678312564	0.101	0.17	2.72773406132207e-20
HAUS8	9.52037373089462e-25	1.36673786735974	0.056	0.027	2.86277638088001e-20
CHTF8	1.03899676312492e-24	1.71851978292917	0.069	0.036	3.12426326671663e-20
SMCO4	1.08220576747357e-24	1.12098077668348	0.046	0.02	3.25419274279303e-20
MAGED1	1.10756057361748e-24	0.113358041997421	0.155	0.232	3.33043464486776e-20
AC022075.1	1.17143091189637e-24	2.55975174140179	0.011	0.002	3.52249275207238e-20
TMEM173	1.25886787673188e-24	1.08164772599171	0.19	0.131	3.78541570533278e-20
ITGA2	1.30985664397649e-24	1.85662512349022	0.03	0.011	3.9387389284373e-20
AC092803.2	1.40818266195143e-24	1.68876927261161	0.042	0.018	4.23440526448795e-20
UTP3	1.41205326359042e-24	1.01659688179838	0.121	0.075	4.24604416361638e-20
BX284668.6	1.41732896689713e-24	1.25028091761105	0.028	0.01	4.26190820345967e-20
LRCH1	1.45119408939541e-24	1.91943086178931	0.07	0.037	4.36374062681199e-20
KLK1	1.46777343836839e-24	0.696459070030091	0.063	0.031	4.41359472917375e-20
LRRN4CL	1.48349253507375e-24	1.36611207134964	0.123	0.077	4.46086205296677e-20
EAF2	1.50524128322026e-24	2.60871085239069	0.025	0.008	4.52626053864333e-20
SOX5	1.51479486702271e-24	0.262250506700334	0.06	0.119	4.5549881651373e-20
ZNF382	1.57396470083865e-24	2.35670427775044	0.021	0.006	4.73291185542183e-20
PON3	1.59199962408815e-24	3.30426862585464	0.014	0.003	4.78714286963306e-20
C3orf38	1.59280380204379e-24	1.20877954240344	0.102	0.06	4.78956103274568e-20
APOBEC3G	1.59584769781897e-24	1.2179993219813	0.072	0.037	4.79871402734163e-20
INHBA	1.73326676179264e-24	1.18679712416714	0.156	0.105	5.21193315271048e-20
AL035563.1	1.81941975107518e-24	2.76036384314419	0.013	0.003	5.47099519148305e-20
FBXO24	1.91195481637635e-24	4.23635600493543	0.012	0.002	5.7492481328437e-20
CCDC71	1.94547182544579e-24	3.58980628299392	0.026	0.008	5.8500337791155e-20
SDCBP2-AS1	2.00058564663883e-24	1.30954312413927	0.024	0.008	6.01576103944298e-20
SSTR2	2.00176610502571e-24	0.723871966619708	0.034	0.013	6.01931067781232e-20
2025-03-03	2.0951669807012e-24	1.59863898981471	0.028	0.009	6.30016711096849e-20
ITGA1	2.22604317536678e-24	0.481178649183911	0.181	0.12	6.69371182832792e-20
CUEDC1	2.33125416205944e-24	1.97357619302948	0.051	0.024	7.01008126531273e-20
EPB41L4A	2.599323718947e-24	2.84308680031139	0.027	0.009	7.81616642287363e-20
RPS6KL1	2.95393629179762e-24	2.30669385722005	0.014	0.003	8.88248642943544e-20
DHX58	3.1229199388341e-24	2.67442729567195	0.03	0.011	9.39062025607414e-20
HTRA3	3.16305701596835e-24	2.30737066515283	0.147	0.1	9.51131244701684e-20
MAP3K4	3.17173650151115e-24	0.243648702185617	0.105	0.176	9.53741166004402e-20
HIPK2	3.23685596315547e-24	1.60250282019436	0.104	0.062	9.7332258812085e-20
NAALAD2	3.62882024823149e-24	0.368362689852255	0.03	0.077	1.09118624864321e-19
TMEM63A	3.64212287647227e-24	2.51848850989695	0.062	0.031	1.09518634895521e-19
MEIS1	3.67104387592252e-24	1.13046564952675	0.196	0.305	1.1038828934899e-19
TCEA3	3.70069900414009e-24	2.11078486035295	0.074	0.04	1.11280019054493e-19
ATAD3C	3.97637222124767e-24	1.72436225343766	0.029	0.01	1.19569512692917e-19
TNFRSF10A	4.70299981293119e-24	2.58237368417423	0.014	0.003	1.41419204374841e-19
DIDO1	4.75244801416795e-24	1.43139530391017	0.141	0.092	1.4290611178603e-19
LAP3	4.80699211804179e-24	1.22297859942524	0.162	0.11	1.44546252989517e-19
GNG12	5.23988964178854e-24	0.919276104072126	0.214	0.154	1.57563481528581e-19
KTI12	5.31271194978382e-24	1.19004138677428	0.061	0.03	1.5975324833e-19
HOXD8	5.36357953654035e-24	1.92384473748536	0.061	0.03	1.61282836663768e-19
CUL3	5.70938777777047e-24	1.16790215622929	0.21	0.151	1.71681290477558e-19
ADCYAP1R1	5.90934747829394e-24	4.39262796725528	0.011	0.002	1.77694078672299e-19
PDP2	5.91817266991028e-24	2.02664464525711	0.028	0.01	1.77959452184202e-19
NBPF14	6.00213604252434e-24	1.10731431769854	0.061	0.03	1.80484230798707e-19
CASK	6.28044069118461e-24	1.59905297159976	0.123	0.077	1.88852851583921e-19
SLX4	6.71435512528964e-24	1.98497185146475	0.032	0.012	2.01900658617459e-19
PLCB1	6.77759700540298e-24	2.29635257343666	0.036	0.014	2.03802341952468e-19
UGDH-AS1	7.49531125500487e-24	1.7422717751468	0.023	0.007	2.25384009437997e-19
BMP1	7.56780247001222e-24	0.13567486700039	0.116	0.185	2.27563820273267e-19
ZNF7	8.72989696887276e-24	1.57001200020704	0.076	0.041	2.62508001854004e-19
PRRG2	8.84826382322871e-24	1.56126925418405	0.03	0.011	2.66067293164487e-19
XPA	8.85724498125194e-24	1.25703019267012	0.139	0.091	2.66337356586246e-19
BCL9L	8.93585203952025e-24	0.257989179668246	0.066	0.126	2.68701070828374e-19
PLEKHA6	9.03927496910923e-24	2.99365955696686	0.021	0.006	2.71810998321115e-19
ZNF773	9.45470276428943e-24	2.07025727040546	0.018	0.005	2.84302912122183e-19
SNHG10	9.69836267623485e-24	0.749744376440145	0.102	0.06	2.91629765674382e-19
CATSPER2	1.03631801028706e-23	1.98998464548259	0.03	0.011	3.1162082569332e-19
CCDC8	1.04194068286954e-23	3.08480622069032	0.083	0.048	3.1331156333887e-19
SEMA6B	1.12287835229168e-23	2.50535872639151	0.013	0.003	3.37649520534109e-19
ZNF350	1.18272437685326e-23	1.84457051674124	0.045	0.02	3.55645220119774e-19
CHMP4B	1.19812148134573e-23	1.03056885178804	0.273	0.214	3.60275129440662e-19
PTPRK	1.20919734623428e-23	1.6158256488319	0.074	0.04	3.63605642012649e-19
SEPT4	1.2937393314814e-23	1.65722726722509	0.023	0.007	3.89027416976456e-19
MYO18A	1.32098504913741e-23	2.70623211674053	0.036	0.014	3.9722020427562e-19
TTC21A	1.38217216390838e-23	2.23766129246422	0.036	0.015	4.1561916968725e-19
HSPA1L	1.39650139848923e-23	1.89001561803447	0.021	0.006	4.19927970525711e-19
IQCG	1.80213976455513e-23	1.13087836758341	0.102	0.061	5.41903427201729e-19
RGS7BP	1.86552086289312e-23	1.70759083755741	0.026	0.009	5.6096212347196e-19
ARHGAP5-AS1	1.88899847803715e-23	1.37286470343216	0.03	0.011	5.6802184234577e-19
POLR2A	2.20378008119507e-23	0.1814959523738	0.135	0.21	6.62676670415356e-19
SYPL2	2.24949752902229e-23	2.95479510918731	0.012	0.002	6.76423906977003e-19
ADCK2	2.28680659707313e-23	2.46303597637398	0.039	0.016	6.8764274373989e-19
PLA2G4A	2.62978686634651e-23	2.73511221524691	0.026	0.009	7.90776910710397e-19
NT5DC2	2.69550939518963e-23	0.778637709518745	0.127	0.08	8.10539675133523e-19
KCNK1	2.90494842298241e-23	1.30203992711254	0.103	0.062	8.73517990790809e-19
LINC02245	2.97504549145116e-23	2.05340362483987	0.014	0.003	8.94596179279363e-19
SMAGP	3.01488344150278e-23	1.39473477602101	0.031	0.011	9.06575450859886e-19
TEX26-AS1	3.46240274256687e-23	1.77629193967618	0.021	0.006	1.04114450468986e-18
MAN1B1-DT	3.52433631958139e-23	1.15047658947209	0.036	0.015	1.05976793129812e-18
NGFR	3.58169631350823e-23	1.81271	0.029	0.011	1.07701608147192e-18
ITGA2B	3.78847264375582e-23	3.74636665802074	0.011	0.002	1.13919372397737e-18
ZNF12	4.00587612194057e-23	1.21966626349924	0.11	0.067	1.20456694986753e-18
NOL9	4.04670375240276e-23	1.29146348455741	0.095	0.055	1.21684381834751e-18
FAM208A	4.10576891746513e-23	1.1413442775583	0.085	0.048	1.23460471348176e-18
TMED4	4.16976209534853e-23	0.921162677622659	0.333	0.27	1.2538474620713e-18
AC104695.3	4.36630872893933e-23	2.00172140950285	0.022	0.007	1.31294903479206e-18
APOPT1	4.43102786612626e-23	0.894682131894946	0.127	0.081	1.33241007934417e-18
ZCWPW1	4.52443008733014e-23	1.72782680494887	0.04	0.017	1.36049612726017e-18
UTP23	4.53951428865904e-23	1.07245404543865	0.153	0.102	1.36503194659977e-18
TIMP2	4.60000581499174e-23	0.801643745275476	0.637	0.596	1.38322174856802e-18
EMILIN1	4.97764009740244e-23	1.5772005550001	0.267	0.216	1.49677637728891e-18
GRID2	5.26300385262361e-23	2.21514532848256	0.016	0.004	1.58258525848392e-18
RDH14	5.27594181156806e-23	1.2924444778279	0.093	0.055	1.58647570273852e-18
TOM1L1	5.29233182780488e-23	2.45897849059078	0.036	0.015	1.59140418062093e-18
RHEB	5.39695683439649e-23	0.692225608015851	0.412	0.368	1.62286492010302e-18
NUDT3	5.4987377952207e-23	1.43888024407871	0.187	0.134	1.65347045502287e-18
ADGRL1	5.5133430942932e-23	1.98530134765009	0.072	0.039	1.65786226845396e-18
FNBP4	5.51678465316778e-23	0.867164680559943	0.331	0.271	1.65889714520755e-18
CCND3	5.67254824694647e-23	1.5497561256017	0.096	0.056	1.7057352578568e-18
NFATC3	5.73779655137169e-23	2.25517069837311	0.084	0.048	1.72535542299747e-18
BRIX1	5.84011311888471e-23	0.718909112909166	0.186	0.129	1.75612201484863e-18
CCL28	5.85317615478411e-23	3.52742379332015	0.015	0.004	1.76005006974358e-18
NUP42	5.96107368239567e-23	0.135915342822183	0.012	0.048	1.79249485629638e-18
ACTN2	6.03253075723365e-23	1.95326359699312	0.017	0.005	1.81398199870016e-18
RNF187	6.15537289942245e-23	1.17012486771251	0.198	0.146	1.85092063085633e-18
S100A2	6.32702131999292e-23	1.47492166667072	0.026	0.009	1.90253531092187e-18
CCSER2	6.49153151778635e-23	1.08876145467435	0.206	0.15	1.95200352739836e-18
AC009041.2	6.67847137853696e-23	1.00996735170931	0.033	0.013	2.00821634352606e-18
KCNG1	6.8240373880725e-23	2.70563417724375	0.013	0.003	2.0519880425934e-18
DYNLT3	6.91132648384647e-23	0.671964772350312	0.277	0.215	2.07823587369263e-18
DGKI	6.98403304236655e-23	1.81225022872298	0.028	0.01	2.10009873583962e-18
MT-ND6	7.15897475912676e-23	0.677346889024467	0.118	0.193	2.15270371006942e-18
RNF115	7.36198793388135e-23	1.37399906109307	0.195	0.142	2.21374977171812e-18
TEF	7.43664151131254e-23	1.71395059948717	0.053	0.025	2.23619810245168e-18
OPHN1	8.00275417796862e-23	2.05501717968241	0.045	0.02	2.40642818131516e-18
RCN1	8.28410737502634e-23	0.152619883899081	0.358	0.46	2.49103108767042e-18
FAM149A	8.34583644568806e-23	3.07661937806586	0.02	0.006	2.5095930192184e-18
NR1D2	8.40486967632008e-23	0.948576633517473	0.207	0.148	2.52734431166945e-18
ARMC10	8.64981358383901e-23	1.44712335577403	0.145	0.097	2.60099894466039e-18
SGIP1	8.68612117590208e-23	0.768525532650741	0.168	0.114	2.61191663759376e-18
MCFD2	8.75959626936209e-23	0.830384129199448	0.282	0.223	2.63401059819718e-18
CD14	9.49027086385006e-23	2.10234954395401	0.035	0.014	2.85372444875971e-18
HNRNPD	9.80133145053415e-23	0.882859102494349	0.436	0.384	2.94726036717562e-18
F8	9.86590689609252e-23	2.63908887248923	0.022	0.007	2.96667820365502e-18
RSRP1	1.00270032367435e-22	0.15298074222275	0.353	0.465	3.01511987328876e-18
FAM228B	1.01441213519691e-22	1.4233892597426	0.099	0.059	3.05033729053711e-18
ADCY3	1.11344541326903e-22	0.230178621579886	0.078	0.139	3.34813035769997e-18
LINC00426	1.11936490131061e-22	2.34407037516936	0.01	0.002	3.365930258241e-18
MAPK13	1.14552574283099e-22	3.16653905217803	0.023	0.008	3.44459590869279e-18
CCDC74A	1.15587315249942e-22	0.739165659209286	0.08	0.045	3.47571056956574e-18
MUM1	1.1689874608444e-22	0.95289216385244	0.124	0.079	3.51514529475911e-18
RAB23	1.19787472458012e-22	1.53993273121556	0.139	0.093	3.60200929681242e-18
RCL1	1.29442164427392e-22	1.62318854290838	0.089	0.052	3.89232588433168e-18
HEBP1	1.30787338785568e-22	0.840334157028064	0.185	0.129	3.93277527728202e-18
ERBIN	1.30885491654698e-22	1.17224158242465	0.213	0.156	3.93572673405677e-18
UBE2D2	1.33352560275171e-22	0.650045331745898	0.368	0.308	4.00991148747438e-18
HDAC9	1.33427254878485e-22	2.16941340413458	0.023	0.008	4.01215755419605e-18
AC009113.1	1.43737834647909e-22	1.44623064402998	0.03	0.011	4.32219668786262e-18
FTH1	1.5240663892999e-22	0.471781280451919	0.911	0.967	4.5828676326248e-18
CHST8	1.56329514563737e-22	2.43946563780701	0.01	0.002	4.70082850293158e-18
CCDC102B	1.63987826611753e-22	0.821641006493086	0.05	0.024	4.93111394621541e-18
SMDT1	1.70126046474634e-22	0.695333587627567	0.382	0.318	5.11569021749225e-18
PARVA	1.75383225383847e-22	0.179645960107734	0.217	0.301	5.27377358729229e-18
SSX2IP	1.86107590337808e-22	1.3978736251003	0.067	0.035	5.59625524145788e-18
TASOR	1.95867199978883e-22	0.531428538747611	0.027	0.071	5.88972670336502e-18
ULK1	1.99814256215862e-22	0.219746133599073	0.054	0.108	6.00841468441098e-18
AC079305.1	2.06922386982588e-22	3.1470406517624	0.01	0.002	6.22215617656643e-18
CLIC2	2.08189767227538e-22	1.30102134815719	0.123	0.078	6.26026630053205e-18
CLIP1	2.08252508001639e-22	0.975944079117351	0.233	0.175	6.26215291560928e-18
ZNF619	2.13033713588967e-22	3.43438600108589	0.017	0.005	6.40592376762024e-18
LCP2	2.19132686212161e-22	2.41170181889467	0.024	0.008	6.58931987439967e-18
GPSM3	2.19526312826304e-22	2.84470203951436	0.021	0.007	6.60115622668697e-18
PLEKHA3	2.40561476925067e-22	0.908328355115636	0.202	0.146	7.23368361113677e-18
TTLL3	2.45015961123152e-22	2.47751664659225	0.127	0.085	7.36762995097319e-18
PITHD1	2.55378215022566e-22	1.19899168336344	0.173	0.121	7.67922292572855e-18
AP1S3	2.62543512164201e-22	2.74624810610894	0.014	0.003	7.89468341077754e-18
AMT	2.73203023881208e-22	3.16161424031011	0.057	0.029	8.21521492810793e-18
KIAA1211	2.78358008160166e-22	2.48891707741762	0.023	0.008	8.37022530537621e-18
TECR	2.80836905061329e-22	0.544385510571547	0.248	0.183	8.44476573519418e-18
RHOJ	2.86195504682001e-22	2.22103073195703	0.088	0.051	8.60589882578778e-18
LACTB2	2.87158817215234e-22	1.55989402132702	0.061	0.031	8.6348656336621e-18
RCSD1	2.96350247777824e-22	1.28979139338638	0.033	0.013	8.91125195067917e-18
TPGS1	2.99574235746881e-22	1.09960012313472	0.182	0.13	9.0081972689087e-18
GFRA1	3.07660354146435e-22	2.43111796303634	0.019	0.005	9.25134684918329e-18
2025-03-07	3.10143445420861e-22	1.32590348675768	0.261	0.203	9.3260134038053e-18
PRKAR2B	3.17297342124516e-22	1.31522622980921	0.082	0.047	9.54113107768418e-18
PEBP1	3.19276319023913e-22	0.685710074842228	0.637	0.64	9.60063891304906e-18
RGS4	3.25424894569712e-22	0.762674049939819	0.076	0.042	9.78552657971123e-18
ABCA6	3.71311705537346e-22	1.85160892299942	0.085	0.049	1.1165342985508e-17
PODXL2	4.08026412568322e-22	1.74293802672608	0.033	0.013	1.22693542259295e-17
AC025171.3	4.32668551518449e-22	2.29005652684887	0.011	0.002	1.30103433441598e-17
FUT10	4.42141611075363e-22	2.12223540717836	0.057	0.029	1.32951982450362e-17
NGDN	4.5901848178542e-22	1.07537	0.138	0.091	1.38026857472876e-17
DTWD2	4.6234420653955e-22	2.38705753795681	0.03	0.011	1.39026902906443e-17
ZNF75D	4.7874366895159e-22	2.79901432009035	0.042	0.018	1.43958221253743e-17
GSR	4.87732766738456e-22	2.49283819318785	0.061	0.032	1.46661242958254e-17
DLX5	4.92838246034607e-22	2.55521780855055	0.038	0.016	1.48196460582606e-17
AC026401.1	5.19062467721841e-22	1.65871307519851	0.016	0.004	1.56082084043958e-17
PDE1B	5.41461322712481e-22	3.56388010420851	0.01	0.002	1.62817419739643e-17
ZNF439	5.7054524626358e-22	1.84431402639565	0.035	0.015	1.71562955551459e-17
FMNL3	6.052600052939e-22	1.93081896103415	0.046	0.021	1.82001683591876e-17
C1S	6.14990292850113e-22	0.989166098013934	0.622	0.62	1.84927581060029e-17
ZNRF1	6.18896889453529e-22	1.67479311917826	0.099	0.06	1.86102294658676e-17
ZNF436-AS1	7.09402660544319e-22	0.941872487141276	0.05	0.024	2.13317380025677e-17
MTO1	7.63751123964473e-22	2.13695661410359	0.06	0.031	2.29659962976117e-17
DDR1	8.66172876835415e-22	3.0354095541033	0.039	0.017	2.60458184064409e-17
ITSN2	8.78447066638863e-22	1.55676191251577	0.108	0.067	2.64149032938306e-17
MFSD2A	9.40904131009324e-22	1.46882204456984	0.037	0.015	2.82929872194504e-17
ATP8B1	9.7635706990435e-22	2.11245622301804	0.04	0.018	2.93590570920238e-17
DYM	1.14507375441971e-21	1.79569000177426	0.131	0.087	3.44323677954006e-17
C1orf109	1.26317516128392e-21	1.60195181765745	0.072	0.039	3.79836770998075e-17
ZC3H6	1.27493139209006e-21	1.27153463656053	0.109	0.068	3.8337186960148e-17
ADHFE1	1.27526834304758e-21	3.2171759876978	0.019	0.006	3.83473190754408e-17
TNFSF4	1.35224757128868e-21	2.79182788676972	0.011	0.002	4.06620844686505e-17
TAS2R4	1.4171638778543e-21	3.00585282049029	0.024	0.008	4.26141178070789e-17
STX11	1.4195788319179e-21	1.27740380244334	0.023	0.008	4.26867354757712e-17
DUSP12	1.44825371257574e-21	1.30187294782006	0.096	0.057	4.35489891371526e-17
FAM45A	1.46738004368734e-21	1.15272345078377	0.08	0.046	4.41241179136782e-17
SPG7	1.48196134639452e-21	1.52087929830448	0.214	0.162	4.45625776860833e-17
ACCS	1.56762730605217e-21	2.26381339587707	0.047	0.022	4.71385530929888e-17
KLHL2	1.57382496556031e-21	2.06591126311256	0.044	0.02	4.73249167143986e-17
CDCP1	1.59109896607457e-21	2.49034726168674	0.017	0.005	4.78443459098623e-17
DEFB124	1.6829664501289e-21	1.0740611422862	0.043	0.02	5.06068011553761e-17
GPR137B	1.69345382980176e-21	1.59679195219617	0.128	0.083	5.09221566621388e-17
TNFRSF1A	1.82521900559304e-21	0.443278679225193	0.231	0.321	5.48843354981828e-17
DOCK10	1.91141685558396e-21	1.75490306544999	0.044	0.02	5.74763048474096e-17
PENK	1.97172330760758e-21	1.50754746663604	0.037	0.016	5.92897198597601e-17
MYO3B	2.27899644126602e-21	2.36610409867105	0.012	0.003	6.85294229888694e-17
AC084033.3	2.34840142308821e-21	1.71112217371046	0.054	0.027	7.06164307922625e-17
DYNC1I1	2.3648872749967e-21	3.17272477760159	0.013	0.003	7.11121603591507e-17
NIPAL1	2.39500651179441e-21	1.71599431231965	0.021	0.007	7.20178458096579e-17
ZC3HAV1L	2.42022156785781e-21	2.40517765561994	0.021	0.007	7.27760625454845e-17
NSG1	2.42347189368998e-21	1.95634467658779	0.037	0.016	7.28737998432576e-17
MAP4K5	2.57310182451802e-21	0.983438061833045	0.233	0.174	7.73731718632568e-17
KRR1	2.7321135395401e-21	0.661826800212645	0.259	0.199	8.21546541339709e-17
LAMA1	2.78535079103151e-21	2.51500477929354	0.015	0.004	8.37554982863175e-17
ANKRD13D	2.92017139549734e-21	1.78900574930238	0.115	0.074	8.78095538626051e-17
POMC	2.97994758449793e-21	1.4409263099092	0.04	0.018	8.96070238658527e-17
CDC25B	3.04589902436778e-21	0.335106866638882	0.034	0.078	9.15901836627391e-17
SRGAP3	3.06347617160999e-21	1.82657569895209	0.036	0.015	9.21187284803124e-17
ANKRA2	3.14231469657042e-21	2.07530673886774	0.08	0.046	9.44894029258724e-17
CAPN3	3.24095274780443e-21	3.74548735842213	0.018	0.006	9.74554491264793e-17
ITFG1	3.4320646052266e-21	1.32751638143905	0.175	0.124	1.03202182679164e-16
ZNFX1	3.4365803200747e-21	1.23371220139435	0.123	0.079	1.03337970224646e-16
IL20	3.58348754519028e-21	2.11683990472277	0.013	0.003	1.07755470483872e-16
2025-03-09	3.62827360960291e-21	1.25497119078494	0.073	0.041	1.09102187440759e-16
KCNMB4	3.70491604327141e-21	2.46651260520471	0.023	0.008	1.11406825421171e-16
UQCC1	3.80762183259833e-21	2.56548378417916	0.074	0.042	1.14495188506232e-16
PALM	3.90250136747763e-21	0.181262960710523	0.086	0.145	1.17348216120052e-16
CEP19	4.16285574094648e-21	1.56796386495501	0.034	0.014	1.25177072130261e-16
TXNDC5	4.27403076650049e-21	1.28207647548368	0.067	0.128	1.2852010514867e-16
PDE8B	4.28037804103129e-21	1.87436	0.037	0.016	1.28710967693811e-16
PAPLN	4.30318566154591e-21	1.40358831909233	0.093	0.161	1.29396792842686e-16
GFRA2	4.4383829634603e-21	0.802715241248332	0.067	0.036	1.33462175711251e-16
UBE2D4	4.62711921679777e-21	1.94614813470908	0.059	0.03	1.39137474849109e-16
ARL8B	4.67041992568176e-21	0.850582474915049	0.236	0.179	1.4043952716525e-16
AL161772.1	4.70288437748832e-21	1.31450297155813	0.035	0.015	1.41415733231074e-16
ZNF630	4.71340185312107e-21	3.58761485915126	0.022	0.008	1.41731993723351e-16
LIF	4.84656402682037e-21	0.886667226083459	0.051	0.025	1.45736180286489e-16
ZFP62	4.84698057049709e-21	2.72876327094412	0.05	0.025	1.45748705754848e-16
MAP4	4.91254908760915e-21	0.102104879236495	0.327	0.417	1.47720351064407e-16
NPIPB6	5.11136600949787e-21	2.02347357649731	0.011	0.002	1.53698775905601e-16
ABCD2	5.42715930936488e-21	2.74440267344422	0.024	0.008	1.63194680432602e-16
PHLDB1	5.70702737222075e-21	0.902583240045363	0.192	0.284	1.71610313082678e-16
ZNF638	5.91396144130842e-21	1.15814241853684	0.265	0.21	1.77832820540144e-16
ACBD4	6.18846991135023e-21	2.17342	0.039	0.017	1.86087290234301e-16
TAPT1	6.39830412884629e-21	1.86880388614997	0.07	0.038	1.92397005154408e-16
GLIS2	6.41573873632819e-21	1.40620326203836	0.1	0.061	1.92921263801389e-16
SERPINB1	6.53663740556287e-21	1.08516650807634	0.133	0.088	1.96556686785275e-16
HTT	6.55996247654216e-21	1.69993795419781	0.097	0.059	1.97258071669623e-16
TSC22D1	6.5785081485353e-21	0.466278714622706	0.509	0.458	1.97815740026457e-16
TNS1	6.58594009478968e-21	0.246955664716245	0.157	0.23	1.98039218650326e-16
TRIM47	6.61242829954821e-21	0.865229639801178	0.125	0.08	1.98835718967415e-16
FLVCR1-DT	6.6258019525352e-21	1.90596484854653	0.015	0.004	1.99237864712733e-16
ARHGAP15	6.87942233174497e-21	1.31301	0.034	0.014	2.06864229515571e-16
GRINA	7.47406216280894e-21	1.71431261594522	0.183	0.134	2.24745049235665e-16
RBMS3	7.88900098651537e-21	0.986363069684378	0.118	0.074	2.37222259664517e-16
SLC2A4	8.41377346392246e-21	1.31610658795498	0.02	0.006	2.53002168060148e-16
RAP1A	8.58746296348265e-21	1.35134087141446	0.184	0.133	2.58225011311923e-16
EIF2D	8.64353810725367e-21	1.42123194927338	0.134	0.089	2.59911190885118e-16
TNK2	8.66433871802183e-21	2.61930506331299	0.045	0.022	2.60536665250917e-16
CROCC	8.82462159163462e-21	2.32342981902589	0.057	0.03	2.65356371260453e-16
SLC44A1	9.12651545504411e-21	1.78321568302257	0.148	0.102	2.74434319733176e-16
ZNF154	9.22683445751159e-21	2.59242663831653	0.013	0.003	2.77450912137373e-16
LMAN2	9.37690850289295e-21	0.140861521644985	0.326	0.417	2.81963638681991e-16
CENPA	9.40055859207017e-21	3.04904094050743	0.01	0.002	2.8267479686355e-16
PLD3	9.66953072924795e-21	1.43754243983675	0.292	0.244	2.90762789028486e-16
SPRY4	1.04436654814351e-20	1.81867761814776	0.055	0.027	3.14041021026754e-16
CDKL1	1.06305615692438e-20	1.97285527023231	0.067	0.037	3.19660986387162e-16
PTGER2	1.11103092532753e-20	2.28338255593492	0.029	0.011	3.34086999245987e-16
ACOX2	1.15420335389813e-20	2.61496238697557	0.027	0.01	3.47068948517168e-16
DPT	1.20133010935668e-20	1.80489424714691	0.095	0.058	3.61239963883554e-16
MIF4GD	1.31736377009438e-20	1.31171378939371	0.057	0.029	3.9613128566738e-16
FAM107B	1.32103131685123e-20	0.86450699265186	0.252	0.195	3.97234116977165e-16
JAM3	1.3461966946549e-20	1.18767617033586	0.154	0.105	4.04801346082728e-16
PRELID1	1.37446409608707e-20	0.512339468435068	0.348	0.293	4.13301353693382e-16
APOL1	1.3842080269725e-20	2.04022261848674	0.085	0.051	4.16231353710631e-16
VLDLR-AS1	1.39371252874103e-20	1.3233926564626	0.023	0.008	4.19089357392428e-16
BTF3	1.50947642280198e-20	0.34555513956661	0.699	0.852	4.53899560336554e-16
KCNJ12	1.51580307111702e-20	2.1550455073607	0.013	0.003	4.55801983484887e-16
CCDC47	1.54684585997947e-20	0.96038713187253	0.301	0.245	4.65136550095826e-16
CDC16	1.56914272706816e-20	2.50047587658141	0.129	0.088	4.71841218029397e-16
FOXP4	1.57862437328718e-20	3.40447515610398	0.031	0.013	4.74692349047454e-16
LRRC37B	1.72578036017115e-20	1.71443814923351	0.038	0.017	5.18942154303466e-16
LUC7L3	1.75077724907114e-20	1.14317418069917	0.483	0.447	5.26458718795691e-16
TIA1	1.80620270149725e-20	0.316686160276041	0.15	0.225	5.43125152340224e-16
DDHD2	1.81620434068888e-20	2.08746883250212	0.072	0.04	5.46132645245148e-16
MUL1	1.89048866252903e-20	1.53871817459345	0.078	0.045	5.68469940822479e-16
SERGEF	1.9333762540467e-20	1.78713745637983	0.064	0.035	5.81366239591841e-16
PPP2R5A	2.01242134348543e-20	1.49450270843385	0.084	0.049	6.05135097986069e-16
PDE7B	2.11317667425523e-20	2.74707738689735	0.037	0.016	6.35432225948548e-16
UNC50	2.18153948094293e-20	1.06780814806645	0.194	0.142	6.55988921919539e-16
RNF114	2.23561407603133e-20	0.802601057377406	0.231	0.174	6.72249152662621e-16
USP32	2.33458760396008e-20	2.04720226235513	0.076	0.043	7.02010492510796e-16
LCN2	2.3666042885146e-20	2.92620945378158	0.015	0.004	7.11637909556342e-16
PSMC2	2.43291292280549e-20	1.00644792075136	0.187	0.136	7.3157691588761e-16
NFASC	2.50602004980332e-20	1.55338996927905	0.04	0.018	7.53560228975859e-16
GNAO1	2.60553352182881e-20	1.34641388871611	0.041	0.018	7.83483930013923e-16
AL138828.1	2.64290076883362e-20	2.72731185330492	0.011	0.002	7.94720261188271e-16
FAM171B	2.70908115565574e-20	2.03467	0.097	0.06	8.14620703505682e-16
NEK8	2.7288479212084e-20	1.68708558019705	0.039	0.018	8.20564569907365e-16
CNTRL	2.78218976447832e-20	2.45556753220445	0.071	0.04	8.36604462178631e-16
CYP27A1	2.82772667599911e-20	1.7445035132436	0.06	0.032	8.50297411472933e-16
STX1B	2.83576417809876e-20	2.95417130637346	0.011	0.002	8.52714288354299e-16
AL391422.3	2.84316569388937e-20	1.92915958834991	0.03	0.012	8.54939924152534e-16
GSTO2	2.95720634150369e-20	1.10836511448888	0.06	0.031	8.8923194689016e-16
SP100	2.97480428339243e-20	0.827690504816785	0.224	0.166	8.94523648016104e-16
MT-ND1	3.26259545952606e-20	0.353294534203346	0.807	0.989	9.81062454679485e-16
XBP1	3.29729151598845e-20	0.168413536696895	0.444	0.562	9.91495558857727e-16
CCDC144NL-AS1	3.36763674434604e-20	1.54103654524012	0.02	0.007	1.01264836902486e-15
MYH7B	3.4736574407713e-20	2.87991678458806	0.014	0.004	1.04452879243993e-15
BMPR2	3.60703477262677e-20	0.396140839201507	0.146	0.215	1.08463535612887e-15
AKT1	3.96715930599104e-20	1.46382136355444	0.163	0.115	1.19292480331151e-15
KHDC4	4.28053564128741e-20	1.52564233531431	0.142	0.097	1.28715706733512e-15
NOV	4.29564163464363e-20	1.52907440744366	0.037	0.016	1.29169943953734e-15
ETV5	4.31226454958135e-20	1.5982251234664	0.053	0.027	1.29669795005911e-15
STIM1	4.48157561889895e-20	0.290829257327136	0.059	0.111	1.34760978860291e-15
MBLAC2	4.77865725474629e-20	1.49422282537875	0.039	0.018	1.43694223650221e-15
IQGAP2	4.81771339791333e-20	2.4215553209068	0.026	0.009	1.44868641875254e-15
ZNF540	4.83834545993862e-20	3.68733966047263	0.017	0.005	1.45489047980354e-15
ILF2	4.90423179931041e-20	0.783789029512278	0.362	0.322	1.47470250205264e-15
MED15	4.99757428854483e-20	1.08878893034843	0.154	0.106	1.50277058856543e-15
MOAP1	5.07794951752701e-20	1.0025490911668	0.116	0.074	1.52693941992037e-15
PRR29-AS1	5.33876024721182e-20	2.42864246525914	0.018	0.005	1.60536520633659e-15
WSB1	5.3802484768803e-20	0.264537518544381	0.468	0.58	1.61784071699791e-15
HBS1L	5.46235482833894e-20	1.69531746913686	0.147	0.102	1.64253009688152e-15
PATL2	5.55127200250288e-20	2.73139696497122	0.01	0.002	1.66926749115262e-15
TPD52L1	5.64476623396503e-20	2.63830301605604	0.02	0.007	1.69738120655328e-15
GDF9	6.00504231800392e-20	2.12678116650017	0.016	0.005	1.80571622502378e-15
MTA1	6.10387579559623e-20	1.71923683157973	0.123	0.082	1.83543545173579e-15
CASZ1	6.86763566998875e-20	3.63826726877437	0.012	0.003	2.06509804596562e-15
CYSTM1	6.90043211223879e-20	0.626491542037634	0.308	0.249	2.0749599361502e-15
ZNF610	7.21641637643469e-20	2.90598513587178	0.012	0.003	2.16997640439391e-15
RNF215	7.75260841534765e-20	1.95925416915559	0.045	0.021	2.33120935049504e-15
TRIB2	7.84044527866229e-20	0.773806733446195	0.091	0.054	2.35762189529375e-15
CFAP410	8.50667416394592e-20	0.333867421569042	0.012	0.045	2.55795692109854e-15
ANKRD45	8.90740178096255e-20	3.08103841605934	0.01	0.002	2.67845571553544e-15
IL19	9.22778303372424e-20	2.00942292345738	0.016	0.004	2.77479435824088e-15
GFOD1	9.76722303391494e-20	2.24467181429288	0.018	0.006	2.93700396629822e-15
MACROD2	1.02384070210627e-19	1.24947196195446	0.03	0.012	3.07868899123355e-15
ZIK1	1.05422813088531e-19	1.86261391282734	0.015	0.004	3.17006398957212e-15
ANXA4	1.06790225884783e-19	1.2436922580349	0.191	0.141	3.21118209235543e-15
PCDHGC3	1.08372274753664e-19	2.5294701428526	0.059	0.032	3.25875430184268e-15
ASAP1	1.08568877822224e-19	1.11582026303549	0.203	0.151	3.26466615611429e-15
TGIF1	1.09879664562294e-19	0.855983455751522	0.234	0.179	3.30408151338818e-15
SH2D4A	1.18754706315979e-19	2.01918924284697	0.023	0.008	3.57095401892149e-15
ZNF70	1.27982401786849e-19	2.82780938666065	0.028	0.011	3.84843082173056e-15
AC005229.4	1.28227042100372e-19	1.33217704965196	0.03	0.012	3.85578715595819e-15
ABHD14A-ACY1	1.30037710071711e-19	2.65056	0.011	0.003	3.91023394185634e-15
FHL1	1.34664472152972e-19	0.643825472953415	0.219	0.163	4.04936067763988e-15
FAM181B	1.37800676406636e-19	1.61747535804544	0.029	0.011	4.14366633954754e-15
DMD	1.3835580253063e-19	1.17906042166434	0.049	0.024	4.16035898209605e-15
ADAMTSL1	1.39414518923478e-19	3.62872628832177	0.013	0.003	4.19219458402898e-15
TK2	1.60862067610742e-19	1.83496725150339	0.094	0.058	4.83712237305501e-15
ATP6V1G1	1.68169499252758e-19	0.519875458227064	0.556	0.561	5.05685684253044e-15
TMEM31	1.68359565625239e-19	2.01041104338497	0.013	0.003	5.06257213835095e-15
ECHDC2	1.77164878390997e-19	1.67830979881105	0.132	0.089	5.32734789321728e-15
N4BP2L1	1.91229578590749e-19	1.37077841244108	0.08	0.047	5.75027342822381e-15
GIT1	1.99773676544729e-19	0.332032496231326	0.027	0.066	6.0071944537e-15
SLC2A11	1.99832888251492e-19	0.936652981020387	0.09	0.054	6.00897494972237e-15
AL450998.2	2.00081691632746e-19	0.744943232543158	0.086	0.051	6.01645646739668e-15
NTF3	2.13412436142809e-19	0.883358903139135	0.025	0.009	6.41731195481428e-15
SLC4A2	2.13866500536556e-19	0.164011377721466	0.055	0.103	6.43096567113425e-15
STK17A	2.15404056834075e-19	1.05598824801316	0.089	0.054	6.47719998900065e-15
LRRC32	2.15808018922463e-19	0.798290525753444	0.075	0.043	6.48934712899846e-15
ANKRD26	2.32174611376442e-19	1.41073732255993	0.128	0.087	6.98149056408962e-15
AKAP17A	2.53578414834805e-19	1.1999053352603	0.167	0.12	7.6251029340826e-15
GOLGA7B	2.66770932946835e-19	2.33109906130448	0.013	0.003	8.02180195371132e-15
MECOM	2.92872241341089e-19	3.87466705430915	0.016	0.005	8.80666829712655e-15
SCML1	2.99091408360769e-19	0.65105438608082	0.159	0.11	8.99367864940833e-15
SMAD2	3.06638552803692e-19	0.15623459438379	0.12	0.184	9.220621282807e-15
SEL1L2	3.13572700135505e-19	1.36626117142524	0.012	0.003	9.42913109307464e-15
RNASET2	3.14865925762935e-19	0.982258069089746	0.118	0.076	9.46801838769145e-15
AC008741.2	3.48498668433943e-19	1.86903180189758	0.038	0.017	1.04793549598087e-14
AKAP12	3.60860286135783e-19	0.788202277249025	0.416	0.373	1.0851068804103e-14
DCBLD2	4.3364476646186e-19	0.939224442938692	0.194	0.143	1.30396981275081e-14
POLE	4.42520137400513e-19	2.04768735724253	0.034	0.015	1.33065805316334e-14
RBM11	4.49515549508246e-19	2.01964294279836	0.014	0.004	1.3516932573713e-14
SH3BGR	4.66798981339883e-19	1.20197631378312	0.04	0.018	1.40366453688903e-14
CADPS2	4.72576100551351e-19	2.23520021217913	0.052	0.027	1.42103633435791e-14
KDELC1	4.79809564194468e-19	1.51114940093833	0.031	0.013	1.44278735953277e-14
SGSM3	4.99603725756241e-19	0.47034467928968	0.021	0.057	1.50230840334902e-14
CDIPT	5.00879641406606e-19	1.41703544629748	0.193	0.144	1.50614508170966e-14
TMEM167B	5.2426802418383e-19	0.926755191209396	0.158	0.111	1.57647394872078e-14
CFAP43	5.53563672529888e-19	2.86835280570335	0.01	0.002	1.66456596329737e-14
HOOK2	5.90378217098149e-19	1.14804061333375	0.115	0.076	1.77526729881413e-14
BTN2A2	6.04112080404205e-19	1.64922356802155	0.048	0.024	1.81656502577544e-14
TMEM130	6.59639131788039e-19	2.02151871980618	0.018	0.005	1.98353486928663e-14
AC034111.1	6.63679347987811e-19	2.31342321155144	0.013	0.003	1.99568379939935e-14
C19orf24	6.76461939364075e-19	0.806739545338568	0.127	0.085	2.03412105166777e-14
POLA2	6.95583843276157e-19	2.34324452060109	0.029	0.012	2.0916206167314e-14
SLC25A32	7.00613976279667e-19	1.37462674192133	0.096	0.06	2.10674622667296e-14
UNC5B	7.05048147394414e-19	1.60360586550665	0.052	0.026	2.120079779215e-14
ANKRD36	7.66217487885195e-19	1.12873970852062	0.081	0.048	2.30401598607078e-14
NTNG1	7.75997613868041e-19	1.70679730771513	0.019	0.006	2.3334248249012e-14
KATNAL1	8.10267644431166e-19	0.141023756344907	0.047	0.092	2.43647480680452e-14
CUL1	8.17775436871208e-19	1.65697307046228	0.14	0.097	2.45905073867172e-14
DUS4L	8.2729767107352e-19	1.51629578447331	0.05	0.026	2.48768409691807e-14
RHBDD2	8.34753340436281e-19	1.36608359676745	0.115	0.075	2.5101032946919e-14
GOLGA7	8.47837478806522e-19	0.968922602045166	0.238	0.183	2.54944729877121e-14
PIGP	8.54956877204725e-19	0.760316130941464	0.185	0.135	2.57085532975461e-14
ZNF706	9.15716227097427e-19	0.53837107359661	0.333	0.277	2.75355869488196e-14
CCDC168	9.19503862090992e-19	2.11098288298842	0.015	0.004	2.76494811330761e-14
ERMAP	9.31260824824954e-19	1.84046332318589	0.039	0.018	2.80030130024864e-14
TSTD1	9.80697117036481e-19	1.54016357443257	0.052	0.027	2.9489562309287e-14
SMARCD2	9.81667855164218e-19	0.106568915949863	0.041	0.084	2.9518752404788e-14
AL606760.3	9.89262521210454e-19	2.06680933113695	0.012	0.003	2.97471240127984e-14
NKAPD1	1.03306493474715e-18	1.04067064093836	0.138	0.094	3.10642625878469e-14
PCLAF	1.03573024958102e-18	2.10147677535368	0.022	0.008	3.11444086049013e-14
CACHD1	1.04414328734185e-18	1.79880087304728	0.061	0.034	3.13973886503696e-14
KANK4	1.07346392755861e-18	2.1778872974591	0.011	0.003	3.22790603016873e-14
POLI	1.15830899409085e-18	2.25614142056497	0.072	0.042	3.48303514523118e-14
DEPDC7	1.16284872403896e-18	1.65569920601538	0.014	0.004	3.49668611318516e-14
APOE	1.16748579812512e-18	0.613530537844579	0.593	0.535	3.51062979496224e-14
IFI6	1.18446597663219e-18	0.722762437397842	0.248	0.191	3.56168919173299e-14
LAYN	1.2116872453732e-18	1.12633634927933	0.071	0.041	3.6435435468372e-14
AC023509.4	1.22877659363099e-18	2.46460894983545	0.014	0.004	3.6949312170484e-14
LINC01290	1.23239531852374e-18	1.83144369988719	0.016	0.005	3.70581272280089e-14
C1QA	1.24380957419379e-18	4.67455555884126	0.012	0.003	3.74013538960072e-14
SPRED2	1.30208800478046e-18	1.17993217599576	0.1	0.063	3.91537863037484e-14
GUCY1A1	1.31491814866898e-18	0.327343972252794	0.089	0.053	3.95395887304761e-14
SERP2	1.35399864642561e-18	1.04707497271911	0.067	0.038	4.07147392980182e-14
HIPK1-AS1	1.37144216883642e-18	2.16222956551385	0.011	0.003	4.12392660169113e-14
PDCD4	1.44880044590372e-18	0.672136714439893	0.19	0.274	4.35654294083249e-14
FGF11	1.45867662430304e-18	2.14318963765051	0.013	0.004	4.38624060927924e-14
MKKS	1.47828863385667e-18	2.19307283434996	0.057	0.03	4.445213922007e-14
TPRG1L	1.4826217021327e-18	1.51909994621651	0.08	0.048	4.45824345831302e-14
CLTA	1.52789866300486e-18	0.532042247896179	0.539	0.53	4.59439127965563e-14
MID2	1.54617815107293e-18	3.13398085995875	0.019	0.006	4.64935770027629e-14
IQSEC2	1.58762231411449e-18	2.3068689003467	0.033	0.014	4.77398029854228e-14
GRHL1	1.596587763484e-18	2.28406249215309	0.012	0.003	4.8009394047964e-14
POLR2J3.1	1.63652529204372e-18	0.705022768080592	0.141	0.097	4.92103155317548e-14
ATP6V0E2	1.69897863792572e-18	1.83679677323431	0.028	0.011	5.10882876424265e-14
AC009403.1	1.81409063631138e-18	1.17275104897999	0.029	0.012	5.45497054338833e-14
REV1	1.83600938468246e-18	1.43145412622596	0.16	0.115	5.52088021974017e-14
SHROOM3	1.84741323469955e-18	1.6645275919977	0.032	0.014	5.55517159674156e-14
ZNF821	1.85852632888743e-18	1.65006950894081	0.05	0.026	5.5885886709645e-14
BATF3	1.86791201800338e-18	1.00848040107825	0.042	0.02	5.61681143813616e-14
RORA	1.88805252631399e-18	0.230208924178351	0.156	0.223	5.67737394662618e-14
TRIM69	1.89255094456984e-18	0.906568822195465	0.082	0.049	5.6909006903215e-14
CSNK1G3	1.90379047041817e-18	1.10278820091054	0.138	0.094	5.72469794454744e-14
APOL3	1.92649517387354e-18	2.2631685064584	0.034	0.015	5.79297098783775e-14
DHRS1	2.04395970706347e-18	1.46208320154533	0.057	0.03	6.14618683913984e-14
CCNI	2.10093512840085e-18	0.479675621618163	0.701	0.724	6.31751193110136e-14
ELP3	2.13241554116711e-18	2.86269676624646	0.07	0.041	6.41217353228951e-14
CPNE8	2.17893273516027e-18	0.856760781768855	0.083	0.05	6.55205073462692e-14
DNASE1	2.42682055777601e-18	1.51013464508592	0.057	0.031	7.29744941723247e-14
SLC2A13	2.47622340770646e-18	1.46864004589862	0.105	0.067	7.44600378697334e-14
PDXK	2.51878701235422e-18	1.21022007404065	0.167	0.12	7.57399254614915e-14
CNIH3	2.54202780253035e-18	1.38005323206721	0.041	0.019	7.64387760220877e-14
AC087564.1	2.6191221151646e-18	1.48799028719671	0.048	0.024	7.87570020029995e-14
PCDHA10	2.77829304901833e-18	1.49044996568612	0.03	0.012	8.35432719839812e-14
POU6F1	2.77960390884723e-18	3.44792256915806	0.021	0.008	8.35826895390361e-14
LGR4	2.86158674488673e-18	3.36370720433074	0.025	0.009	8.60479134187438e-14
ITPRID2	3.03119392995451e-18	0.781279679708135	0.027	0.065	9.11480014737321e-14
PEX1	3.03388876135903e-18	1.51192284769678	0.08	0.048	9.1229035054066e-14
SEMA4F	3.06934046252508e-18	3.32162680388546	0.013	0.003	9.22950677081293e-14
ZNF788P	3.10842484855399e-18	2.78518319017891	0.01	0.002	9.34703351960185e-14
SRPRB	3.21933502588768e-18	0.124760566979867	0.127	0.188	9.68054042284425e-14
PASK	3.30223511600287e-18	2.77417793729097	0.013	0.003	9.92982099382064e-14
TMEM38A	3.33998734837235e-18	2.48870871908238	0.011	0.003	1.00433419565557e-13
CDH1	3.35128742392341e-18	3.74481777217412	0.017	0.005	1.00773212837377e-13
AC007950.2	4.21646128262937e-18	1.67871297938846	0.02	0.007	1.26788990768665e-13
LYRM9	4.44676363220993e-18	1.44959791500455	0.06	0.033	1.33714182420553e-13
TNFRSF21	4.5435899823174e-18	2.83199029564581	0.103	0.069	1.36625750768284e-13
EIF4H	4.56027389435212e-18	0.721066778350555	0.373	0.326	1.37127436003168e-13
FRY	4.64120454175499e-18	1.08885781686813	0.047	0.023	1.39561020570573e-13
BCLAF3	4.6611390698778e-18	2.23003034541648	0.064	0.036	1.40160451831225e-13
RAB22A	4.81811467319877e-18	0.853922245064725	0.173	0.125	1.44880708223087e-13
WDR53	4.85156042485127e-18	2.17627698459704	0.024	0.009	1.45886421975278e-13
PSMC1	4.90813076311467e-18	0.717150017836748	0.26	0.209	1.47587492046858e-13
DUT	5.445567179414e-18	0.679225627056562	0.33	0.281	1.63748205084979e-13
TSPAN2	5.69741899440626e-18	2.71304899129361	0.017	0.005	1.71321389161796e-13
NBPF3	5.76597331104112e-18	2.71540975578809	0.011	0.003	1.73382817463007e-13
COL1A2	6.38589620599247e-18	0.822305396474649	0.784	0.82	1.92023898914193e-13
NAV3	6.42692787731113e-18	1.60073318726749	0.061	0.033	1.93257721270746e-13
IFFO1	6.51891877641308e-18	2.01477944612652	0.065	0.037	1.96023887606741e-13
NEK10	6.58677160651515e-18	1.75484946918782	0.025	0.01	1.98064222207911e-13
ASIC2	6.63022057653415e-18	1.8609180163838	0.034	0.015	1.99370732736382e-13
PCNX1	6.64284538287196e-18	0.512932052096508	0.092	0.148	1.9975036066296e-13
SARAF	6.65161763958328e-18	0.491990172519154	0.501	0.468	2.00014142422269e-13
FOXK1	6.69994969403943e-18	1.20218960582981	0.096	0.06	2.01467487299766e-13
LRIG3	6.74355923596219e-18	0.556820837856317	0.059	0.107	2.02778826225383e-13
VCPKMT	7.11515625102723e-18	1.32973600091352	0.078	0.046	2.13952748468389e-13
AC093677.2	7.21603850631546e-18	2.26558051002864	0.012	0.003	2.16986277884906e-13
INPP1	7.43723237053545e-18	1.57052839336074	0.103	0.066	2.23637577382001e-13
AC011815.2	7.53417711019464e-18	1.54391902427356	0.017	0.005	2.26552705703553e-13
TMEM156	7.90742896201989e-18	2.03383984699185	0.01	0.002	2.37776388887938e-13
SELENBP1	8.24156198540187e-18	1.66422795688627	0.112	0.075	2.47823768901034e-13
DENND4C	8.33975410907767e-18	1.75359919823803	0.113	0.075	2.50776406059965e-13
TCAF1	8.51533547275111e-18	0.182414364053857	0.128	0.189	2.56056137665626e-13
RERE	8.69551662284709e-18	1.36521628060979	0.253	0.204	2.61474184849012e-13
CCDC102A	8.97653370727095e-18	1.42444620501432	0.067	0.038	2.69924368577638e-13
NICN1	9.13544693014796e-18	3.6892619618682	0.027	0.011	2.74702889189549e-13
EPB41L4A-AS1	9.4733223585809e-18	0.402099475229055	0.409	0.356	2.84862803322528e-13
GPC1	9.62149098788569e-18	1.20562389959417	0.177	0.132	2.89318234005723e-13
SNAP25	1.06822722024554e-17	2.51852825369114	0.016	0.005	3.21215925127833e-13
ZNF606	1.07276073689574e-17	2.91830374820192	0.037	0.017	3.22579153584548e-13
THADA	1.10173448255561e-17	2.12125894883116	0.092	0.058	3.31291558904471e-13
TRIM41	1.10511266339144e-17	1.47214	0.067	0.038	3.32307377881805e-13
SPTLC3	1.11837544979627e-17	3.11270275499297	0.019	0.006	3.36295497753738e-13
AL359915.2	1.20638144259278e-17	2.30531973690042	0.014	0.004	3.62758899787649e-13
AC137767.1	1.22548327745741e-17	1.85995386716879	0.03	0.013	3.68502821531444e-13
UBA2	1.2351521543373e-17	0.885224208409157	0.252	0.199	3.71410252809226e-13
FBF1	1.25142824844995e-17	2.60235823890832	0.029	0.012	3.76304474308901e-13
AC018647.1	1.25545277770794e-17	1.46554329877691	0.01	0.002	3.77514650256779e-13
SPACA6	1.25649651849047e-17	2.41556136243094	0.053	0.028	3.77828503110085e-13
CDC42BPA	1.26214018536159e-17	1.17173807335643	0.177	0.131	3.79525553738229e-13
DPP8	1.2978291582242e-17	1.3915268441423	0.108	0.071	3.90257227878017e-13
KALRN	1.30055592250803e-17	0.394546367182301	0.03	0.067	3.91077165898164e-13
SEPHS2	1.31635414314483e-17	1.06573224594804	0.121	0.082	3.95827690843652e-13
IER5	1.32599299704309e-17	1.10320620524648	0.285	0.239	3.98726094210857e-13
PCGF5	1.32897703771215e-17	0.914559373985105	0.162	0.116	3.99623395240045e-13
SRPRA	1.34617765580958e-17	1.34250763383136	0.25	0.202	4.0479562110194e-13
MBOAT1	1.42939287922054e-17	1.86909311525482	0.053	0.029	4.29818438781616e-13
LPAR1	1.48549952145068e-17	0.843235112477451	0.094	0.152	4.46689706100221e-13
BEX5	1.56436389934262e-17	3.22741679944994	0.015	0.005	4.70404224532326e-13
OXTR	1.57870238257595e-17	1.8891992980819	0.013	0.004	4.74715806440587e-13
PTPRA	1.61382526737571e-17	1.11753568553847	0.19	0.143	4.85277257899877e-13
EPHB4	1.62625248943638e-17	0.696721543493733	0.043	0.087	4.89014123573521e-13
CCDC121	1.64106381365992e-17	1.54827339799187	0.042	0.021	4.93467888767539e-13
AGT	1.68456547455949e-17	1.14950997169352	0.032	0.014	5.06548838200038e-13
TIMM10B	1.78675147586771e-17	1.31226803084494	0.113	0.075	5.37276168793419e-13
TNNC1	1.81172904727157e-17	2.09105523603834	0.01	0.002	5.44786924514561e-13
MMUT	1.85648152176718e-17	0.641564016045402	0.01	0.038	5.58243993595391e-13
CD48	1.86197077966315e-17	3.36801100102464	0.012	0.003	5.5989461344471e-13
CCDC7	1.86928607081961e-17	2.01708048182418	0.044	0.022	5.62094321495458e-13
GGA2	1.88324956346764e-17	2.24655697374732	0.097	0.062	5.66293143734718e-13
LIMK1	1.89176212288319e-17	1.53127701109091	0.074	0.044	5.68852870350975e-13
SLC43A3	2.0664122423008e-17	1.72268012235158	0.047	0.024	6.2137016125985e-13
ZNF292	2.07396146724932e-17	0.150468060860348	0.177	0.247	6.23640213201872e-13
PHF19	2.15774136742902e-17	1.74696102335765	0.083	0.051	6.48832829185908e-13
TIPIN	2.21903340003757e-17	1.07501819096246	0.051	0.027	6.67263343391298e-13
PALM2	2.24070016647017e-17	1.69471477918481	0.022	0.008	6.73778540057581e-13
BAZ1B	2.2410873494623e-17	1.1513568368672	0.207	0.159	6.73894965983313e-13
OCIAD1	2.24531557273895e-17	0.58647567468555	0.416	0.369	6.75166392722602e-13
L1TD1	2.27582468959476e-17	1.95324540375598	0.016	0.005	6.84340484161146e-13
DHFR	2.29761393065068e-17	2.58268757719523	0.033	0.015	6.90892508946659e-13
NXPH3	2.33435854340566e-17	2.23739979205259	0.036	0.017	7.01941614002083e-13
AC106739.2	2.46556502877099e-17	2.45906589272388	0.013	0.004	7.41395404151437e-13
RNF219	2.48880325729149e-17	1.46281671258051	0.042	0.02	7.48383139467551e-13
DCLK1	2.64210585170608e-17	1.71482876120216	0.049	0.025	7.94481229608019e-13
NFATC4	2.70212760750042e-17	0.74572998449311	0.092	0.15	8.12529771575377e-13
SOCS1	2.72142137255517e-17	0.945829174045738	0.123	0.083	8.1833140672734e-13
PLSCR4	2.73126477052519e-17	1.43409029961433	0.108	0.072	8.21291316496924e-13
CDK18	2.73766752034026e-17	2.36372488250856	0.019	0.007	8.23216623366315e-13
EPHB2	2.91255283631368e-17	2.37912726482572	0.017	0.006	8.75804637879524e-13
SLC22A17	3.00200378922477e-17	1.44087134465085	0.115	0.077	9.02702539419889e-13
KIAA1468	3.01055576750815e-17	1.50311879037108	0.035	0.016	9.05274119289701e-13
RSPRY1	3.1496245959292e-17	0.117583582283517	0.111	0.167	9.47092115995912e-13
NEO1	3.19339074135758e-17	1.52277496918739	0.081	0.049	9.60252595926224e-13
AC073610.3	3.19385244106327e-17	1.88591201336204	0.016	0.005	9.60391429027727e-13
FAM174C	3.3691298160807e-17	0.954780022672312	0.02	0.053	1.01309733569547e-12
ADGRE2	3.40178171992222e-17	1.75956459413944	0.028	0.011	1.02291576318061e-12
TRAPPC10	3.60261440782761e-17	1.84667131083502	0.077	0.047	1.08330615243376e-12
TSR2	3.82055318397511e-17	0.8846983741854	0.139	0.097	1.14884034242132e-12
CDT1	3.88689518282497e-17	2.44303049446165	0.01	0.002	1.16878938147547e-12
OBSCN	3.89306797686917e-17	2.66867656094706	0.045	0.023	1.17064554064456e-12
KCNG3	3.92483289162459e-17	2.36856239167354	0.013	0.003	1.18019725051152e-12
FMO2	3.94556460742878e-17	2.86725	0.011	0.003	1.18643127745383e-12
MAP2K1	3.96982096698685e-17	1.61058547113141	0.114	0.076	1.19372516477294e-12
TBC1D2B	4.03001726381238e-17	1.79863933269763	0.165	0.124	1.21182619122838e-12
TNK1	4.1280688056775e-17	2.67498407412495	0.01	0.002	1.24131028986722e-12
DDX39A	4.16410656770772e-17	1.23924594659637	0.181	0.137	1.25214684490971e-12
LFNG	4.25441447365889e-17	1.92545596747996	0.054	0.029	1.27930243222923e-12
TMEM263	4.62397134294646e-17	0.172885092167896	0.219	0.294	1.390428182824e-12
ZNF841	4.68734130031836e-17	2.18121641232565	0.042	0.021	1.40948352900573e-12
MPHOSPH8	4.83712478750637e-17	0.632797701667965	0.392	0.344	1.45452342360316e-12
EFCAB13	4.85620732822743e-17	2.76505851577212	0.028	0.012	1.46026154359799e-12
[truncated: 1,976 more rows]
